# Supplementary material
Source: PubMed Central journal article supplement (PMC6873284)
Supplement: DS_10.1177_0022034519882355.pdf [file DS_10.1177_0022034519882355.pdf]

## **Transcriptomic and Single-Cell Analysis of the Murine Parotid Gland**

A. Oyelakin, E.A.C. Song, S. Min, J.E. Bard, J.V. Kann, E. Horeth, K. Smalley, J.M. Kramer, S. Sinha, and R.A. Romano

### **APPENDIX**

#### **Appendix Materials and Methods**

##### **Animal Experiments**

All animal experiments and procedures were performed in accordance with the State University of New York at Buffalo (University at Buffalo) Institutional Animal Care and Use Committee (IACUC) regulations. All procedures were approved by University at Buffalo IACUC. Wild type C57BL/6J (Stock No. 000664) mice were purchased from The Jackson Laboratory (Bar Harbor, Maine). Animals were euthanized by CO<sub>2</sub> inhalation. Parotid and submandibular glands were dissected from postnatal day 18 (P18, young) and 12-week old (adult) male mice as indicated.

##### **RNA Isolation and Sequence Mapping**

Total RNA was extracted from whole mouse salivary gland tissues at indicated time points (P18 and adult) as previously described (Gluck et al. 2016). For each RNA sample, 50bp cDNA-libraries were generated using the TrueSeq RNA Sample Preparation Kit (Illumina). Libraries were single-end sequenced on the Illumina HiSeq 2500. Quality metrics were generated using FASTQC (Andrews 2010) v0.4.3, and high quality reads were mapped to the Mouse genome (mm9 build) with the Tophat2 (Kim et al. 2013) v2.0.13 wrapper for Bowtie2 (Langmead and Salzberg 2012) v2.2.6. The reads that

aligned to the mouse genome were counted using featureCounts (Liao et al. 2014). New sequencing data generated for this study has been deposited in the Gene Expression Omnibus (GEO) database under the accession number GSE131285.

### **Bioinformatics Analysis**

All computational analysis was performed on the R Statistical Platform (R Development Core Team 2018) v 3.5.1., heatmaps were generated using Pretty Heatmaps Package (Kolde 2019), and differential gene expression analysis was performed using DESeq2 package (Love et al. 2014) v1.22.2. All differentially expressed genes were called at a log<sub>2</sub> Fold Change of 1 and an adjusted *p*-value of 0.1 unless otherwise specified.

### **Parotid Gland Signature**

We have previously described the compilation of a comprehensive mouse tissue RNA-sequencing dataset (Gluck et al. 2016) using data obtained from the mouse ENCODE consortium (Yue et al. 2014), skin (Rizzo et al. 2015) and adult submandibular salivary gland (Gluck et al. 2016). This dataset was combined with the newly generated adult parotid gland dataset (this study). The raw sequencing files for each of the publicly available datasets were processed using the same RNA-sequencing pipeline (described above). The combination of these datasets resulted in a 20,028 x 53 counts matrix. The counts matrix was normalized using the DESeq2 package (Love et al. 2014) in R, and a data frame of Transcripts Per Million (TPM) values were generated as previously described (Wagner et al. 2012). Contrasts were iteratively generated between the parotid gland and the other tissues to identify differentially expressed genes. For the comparison

between parotid gland and epithelial tissues such as bladder, colon, skin, duodenum, submandibular salivary gland and pancreas; a log<sub>2</sub> Fold Change cut off of 1.2 instead of 1 was used given their similarities to parotid glands. The intersect of the upregulated genes (parotid gland enriched genes) generated across all contrasts was identified and this served as the parotid gland signature. The parotid gland gene signature using the Gao et al. dataset (Gao et al. 2018) was generated using the same pipeline used for our PG gene signature to ensure consistency. Briefly the male SMG, PG, and SLG FASTQ files were downloaded from the GEO database (GSE96747) and aligned to the mouse genome (*mm9*). Subsequent to alignment, the dataset was subjected to the same DEG analysis as described above.

### **Hierarchical Clustering Analysis**

A subset of the full data frame containing TPM values of all expressed genes was created using the parotid gland signatures to generate a smaller matrix. Hierarchical clustering analysis for Figure 4A and 4B was then performed on this smaller subset using Pearson Correlation as similarity metric and Average Linkage as a distance measure. The resulting matrix was the z-scaled row-wise across tissues for visualization using the Pretty Heatmap Package.

### **Correlation Analysis**

Correlation analyses (Fig. 3) were performed by calculating the pairwise Pearson Correlation of the top 2,500 most variable genes that were expressed in at least one sample replicate across all tissues. The resulting matrix was then reordered by

hierarchical clustering using Average Linkage as a distance measure while preserving the pair-wise correlation.

### **Differential Gene Expression Analysis**

Counts from the young parotid and young submandibular datasets were combined with those from the adult parotid and adult submandibular glands into one data frame. Gene expression analysis was performed by generating contrasts between adult submandibular and parotid glands (Fig. 1A), adult parotid and young parotid (Appendix Fig. 2A) and young submandibular and young parotid glands (Appendix Fig. 2C). The differentially expressed genes (DEGs) were then further filtered by level of expression to identify genes that are expressed at 5 TPM values or higher in at least one replicate. Counts from the alignment of the male submandibular and parotid glands from the Gao et al. dataset were imported into one matrix. Differential gene expression analysis was performed by setting up contrast between the parotid and submandibular gland samples. The result was further filtered by focusing on genes that are similarly enriched in the respective glands in our own dataset.

### **Gene Ontology Analysis**

Gene ontology analysis for identification of enriched pathways was done using the Database for Analysis Visualization and Integrated Discovery (DAVID) (Huang et al. 2007; Sherman et al. 2007) v6.8. The database was queried by providing the list of official names of genes of interest. The resulting KEGG Pathway (Du et al. 2014; Kanehisa and

Goto 2000; Ogata et al. 1999; Wixon and Kell 2000) table was then imported into R for generating bar plots.

### **Single-cell RNA sequencing**

Single cell suspensions from freshly isolated young male (P18) murine parotid glands were generated for scRNA-seq analysis as previously described (Song et al. 2018). A total of 492 cells were sequenced to a depth of 394,442 mean reads per cell and 1,632 median genes per cell. Output from 10X Genomics Cellranger v2.0.2 pipeline was used as input into the R analysis package Seurat (Stuart et al. 2018) v2.3.4. Cells with high unique molecular index counts (nUMI), high mitochondrial transcript counts, and high transcript counts for red blood cell markers were filtered from the analysis. The data was normalized using Seurat's LogNormalize, with a scale factor of 10,000. Principal Component Analysis (PCA), and cluster analysis was performed, and the t-Distributed Stochastic Neighbor Embedding (tSNE) algorithm was used for dimensionality reduction and visualization. Using the called clusters, cluster-to-cluster differential expression testing using the Wilcoxon Rank Sum identified unique gene markers for each cluster. A complete list of differentially expressed genes are provided in Appendix Table 7. Datasets have been deposited in the Gene Expression Omnibus (GEO) database under the accession number GSE132867.

### **Immunostaining and Imaging**

Paraffin embedded parotid and submandibular gland tissue sections were processed for immunofluorescence analysis as previously described (Song et al. 2018). Primary

antibodies used at the indicated dilutions include Ngfr (1:25, Santa Cruz Biotechnology), Ngf (1:25, Santa Cruz Biotechnology), K14 (1:100 (Rizzo et al. 2016)), Pax9 (1:25, Santa Cruz Biotechnology), Crabp-I/II (1:25, Santa Cruz Biotechnology), and Nkcc1 (1:100, Cell Signaling Technology, D2O8R). Sections were mounted using VECTASHIELD Antifade Mounting Medium with DAPI (Vector Laboratories) and imaged using a ZEISS Confocal microscope with ZEISS ZEN imaging software.

## Appendix References

- Andrews S. 2010. Fastqc: A quality control tool for high throughput sequence data.
- Du J, Yuan Z, Ma Z, Song J, Xie X, Chen Y. 2014. Kegg-path: Kyoto encyclopedia of genes and genomes-based pathway analysis using a path analysis model. *Mol Biosyst.* 10(9):2441-2447.
- Gao X, Oei MS, Ovitt CE, Sincan M, Melvin JE. 2018. Transcriptional profiling reveals gland-specific differential expression in the three major salivary glands of the adult mouse. *Physiol Genomics.* 50(4):263-271.
- Gluck C, Min S, Oyelakin A, Smalley K, Sinha S, Romano RA. 2016. Rna-seq based transcriptomic map reveals new insights into mouse salivary gland development and maturation. *BMC Genomics.* 17(1):923.
- Huang DW, Sherman BT, Tan Q, Collins JR, Alvord WG, Roayaei J, Stephens R, Baseler MW, Lane HC, Lempicki RA. 2007. The david gene functional classification tool: A novel biological module-centric algorithm to functionally analyze large gene lists. *Genome Biol.* 8(9):R183.
- Kanehisa M, Goto S. 2000. Kegg: Kyoto encyclopedia of genes and genomes. *Nucleic Acids Res.* 28(1):27-30.
- Kim D, Pertea G, Trapnell C, Pimentel H, Kelley R, Salzberg SL. 2013. Tophat2: Accurate alignment of transcriptomes in the presence of insertions, deletions and gene fusions. *Genome Biol.* 14(4):R36.
- Kolde R. 2019. Pretty heatmaps.
- Langmead B, Salzberg SL. 2012. Fast gapped-read alignment with bowtie 2. *Nat Methods.* 9(4):357-359.
- Liao Y, Smyth GK, Shi W. 2014. Featurecounts: An efficient general purpose program for assigning sequence reads to genomic features. *Bioinformatics.* 30(7):923-930.
- Love MI, Huber W, Anders S. 2014. Moderated estimation of fold change and dispersion for rna-seq data with deseq2. *Genome Biol.* 15(12):550.
- Ogata H, Goto S, Sato K, Fujibuchi W, Bono H, Kanehisa M. 1999. Kegg: Kyoto encyclopedia of genes and genomes. *Nucleic Acids Res.* 27(1):29-34.

- R Development Core Team. 2018. R: A language and environment for statistical computing. R Foundation for Statistical Computing.
- Rizzo JM, Oyelakin A, Min S, Smalley K, Bard J, Luo W, Nyquist J, Guttman-Yassky E, Yoshida T, De Benedetto A et al. 2016. Deltanp63 regulates il-33 and il-31 signaling in atopic dermatitis. *Cell Death Differ.*
- Rizzo JM, Romano RA, Bard J, Sinha S. 2015. Rna-seq studies reveal new insights into p63 and the transcriptomic landscape of the mouse skin. *J Invest Dermatol.* 135(2):629-632.
- Sherman BT, Huang da W, Tan Q, Guo Y, Bour S, Liu D, Stephens R, Baseler MW, Lane HC, Lempicki RA. 2007. David knowledgebase: A gene-centered database integrating heterogeneous gene annotation resources to facilitate high-throughput gene functional analysis. *BMC Bioinformatics.* 8:426.
- Song EC, Min S, Oyelakin A, Smalley K, Bard JE, Liao L, Xu J, Romano RA. 2018. Genetic and scrna-seq analysis reveals distinct cell populations that contribute to salivary gland development and maintenance. *Sci Rep.* 8(1):14043.
- Stuart T, Butler A, Hoffman P, Hafemeister C, Papalexi E, Mauck WMI, Stoeckius M, Smibert P, Satija R. 2018. Comprehensive integration of single cell data. *bioRxiv.*
- Wagner GP, Kin K, Lynch VJ. 2012. Measurement of mrna abundance using rna-seq data: Rpkm measure is inconsistent among samples. *Theory Biosci.* 131(4):281-285.
- Wixon J, Kell D. 2000. The kyoto encyclopedia of genes and genomes--kegg. *Yeast.* 17(1):48-55.
- Yue F, Cheng Y, Breschi A, Vierstra J, Wu W, Ryba T, Sandstrom R, Ma Z, Davis C, Pope BD et al. 2014. A comparative encyclopedia of DNA elements in the mouse genome. *Nature.* 515(7527):355-364.

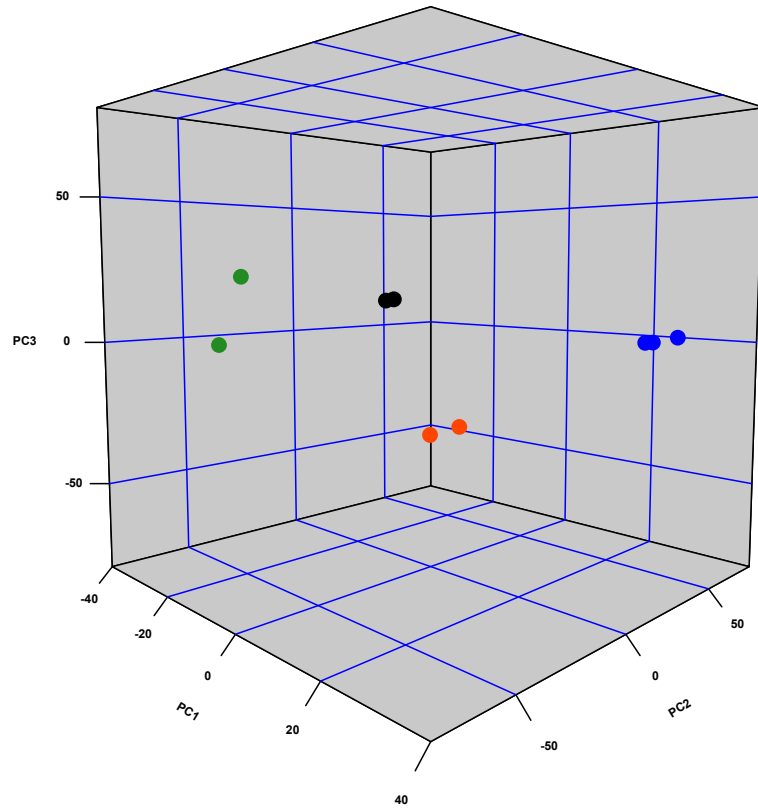

- Young Parotid Gland
  - Young Submandibular Gland
- Adult Parotid Gland
  - Adult Submandibular Gland

**Appendix Figure 1.** Three-dimensional projection plot shows the Principal Component Analysis (PCA) coordinates for each salivary gland sample, which are indicated by different colors.



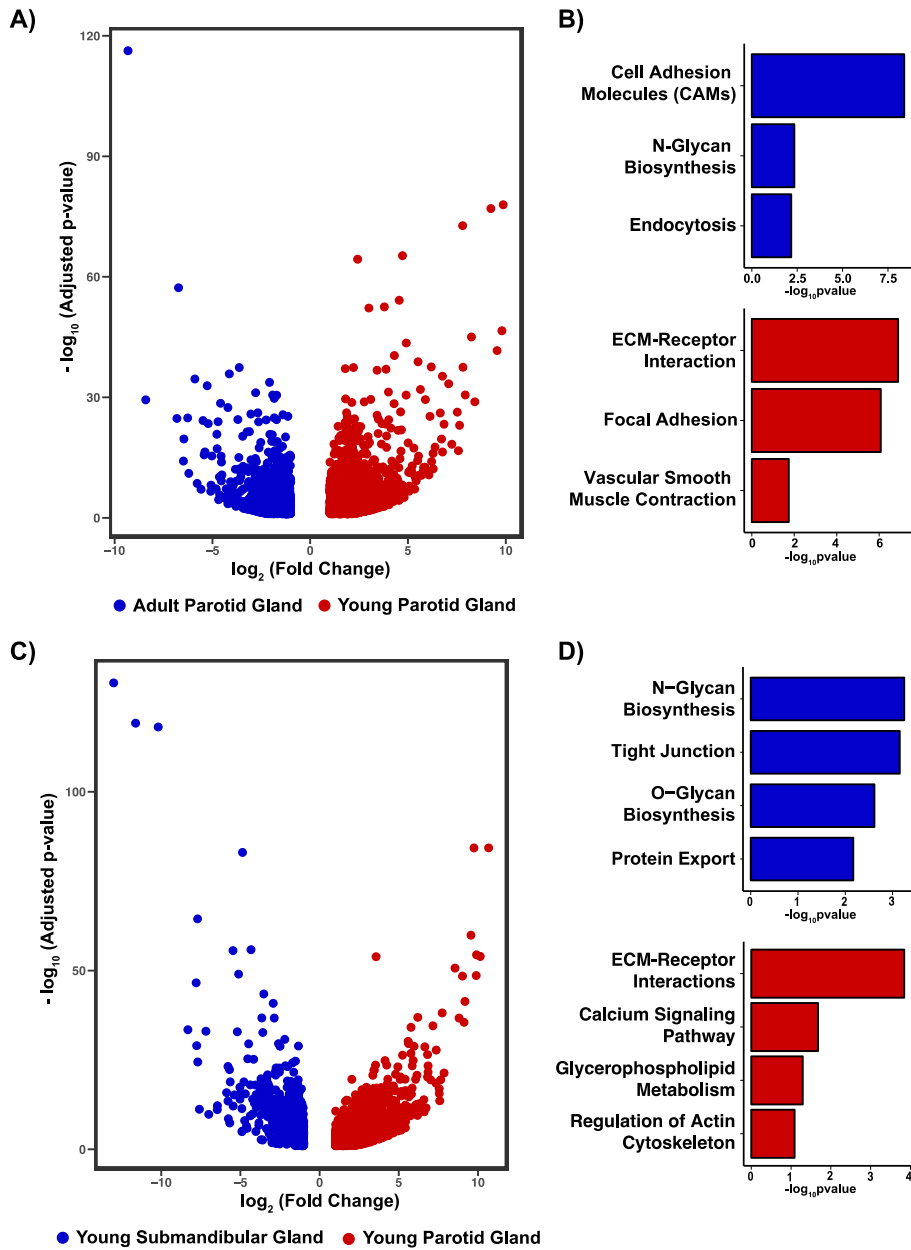

**Appendix Figure 2.** (A) Volcano plot showing the distribution of genes enriched in the adult parotid (blue) and young parotid (red) glands. (B) Bar plots highlighting KEGG pathway terms enriched in the adult (blue) and young (red) PGs. (C) Volcano plot showing the distribution of genes enriched in the young submandibular (blue) and young parotid (red) glands. (D) Bar plots highlighting KEGG pathway terms enriched in the young submandibular (blue) and young parotid (red) glands.

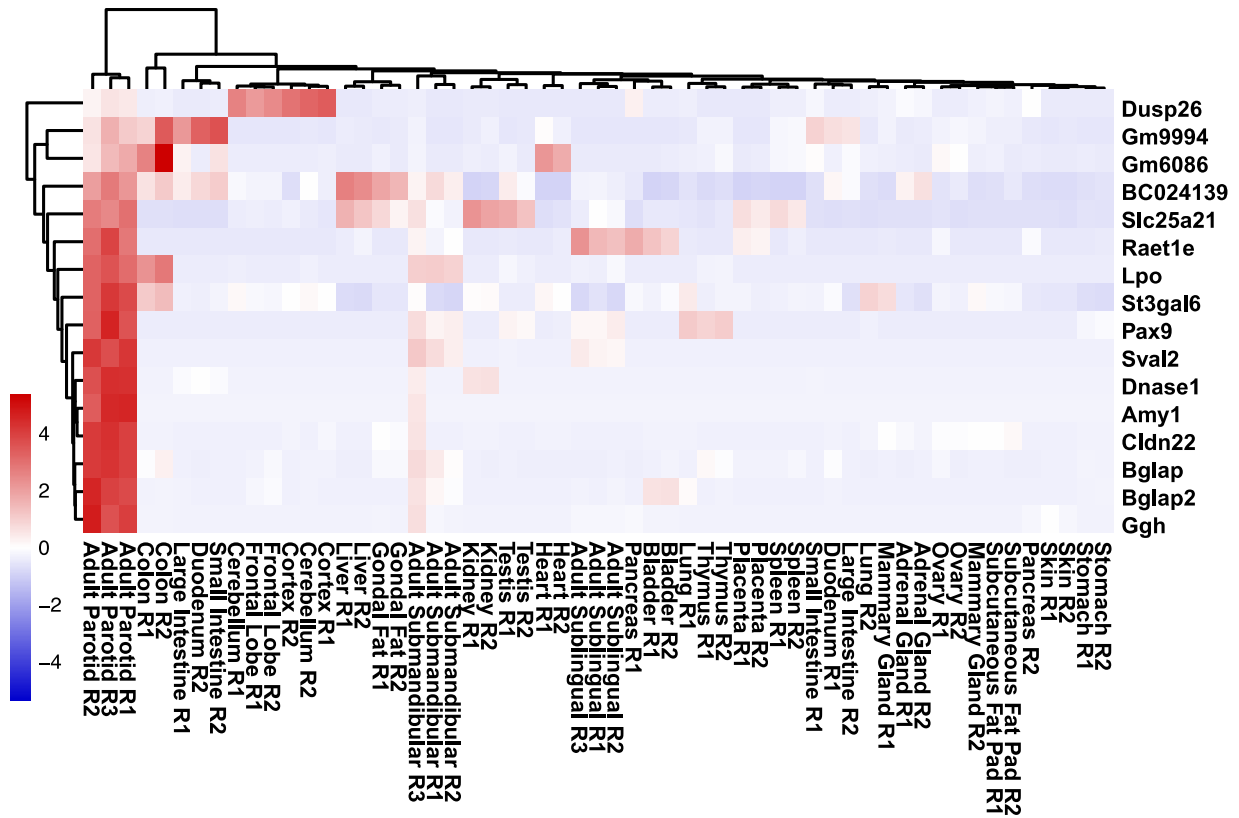

**Appendix Figure 3. Visualization of a parotid gland gene signature.** Hierarchical clustering of the gene expression values selected from the PG gene signature generated utilizing the SMG, PG and SLG datasets from Gao et al. (Gao et al. 2018).

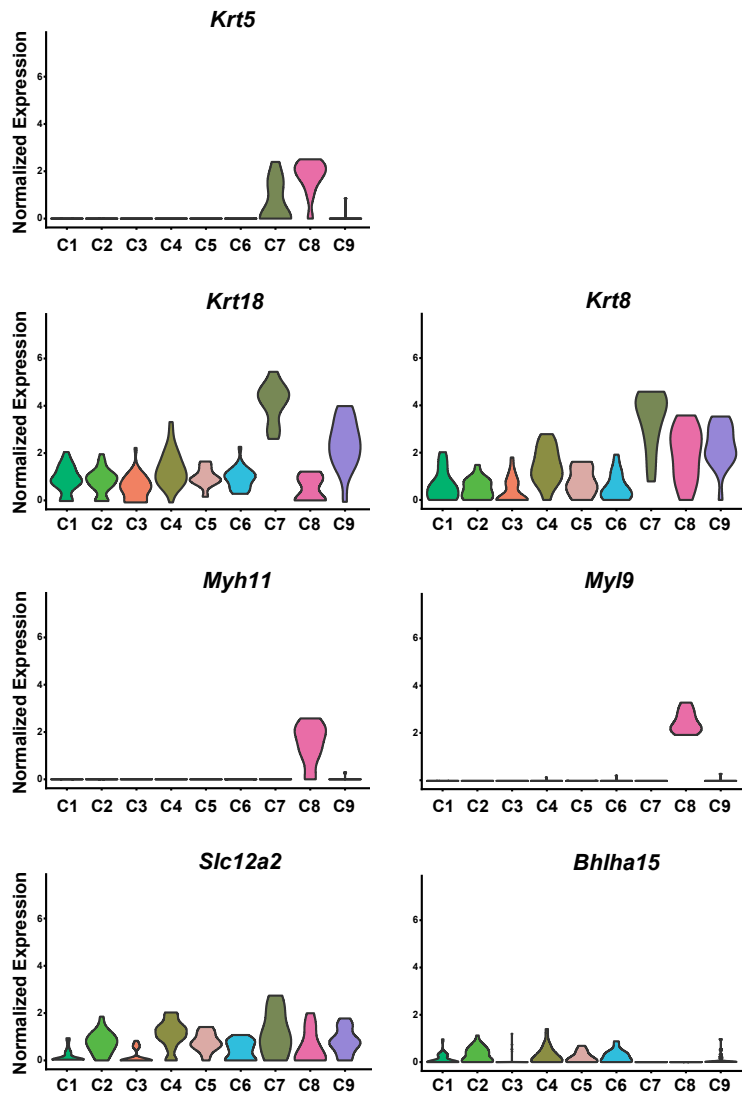

**Appendix Figure 4.** Violin plots demonstrate cluster specific expression of known basal (*Krt5*), ductal (*Krt8*, *Krt18*), myoepithelial (*Myh11*, *Myl9*), and acinar (*Slc12a2*, *Bhlha15*) genes in the PG as identified by scRNA-seq.

## Appendix Table 1

### Young PG Enriched Biological Pathways and Associated Genes

| Term                               | P-Value  | Genes                                                                                                                                                                                                                                            |
|------------------------------------|----------|--------------------------------------------------------------------------------------------------------------------------------------------------------------------------------------------------------------------------------------------------|
| ECM-receptor interaction           | 4.51E-07 | COL4A2, COL4A1, TNXB, COL3A1, ITGA1, ITGA11, COL5A2, COL5A1, HMMR, LAMA2, LAMA4, CD36, ITGA6, COL6A6, ITGB8, COL6A2, COL1A2, COL6A1, COL1A1, LAMC1, FN1                                                                                          |
| Focal adhesion                     | 1.12E-06 | CAV1, TLN2, COL3A1, ITGA11, ARHGAP5, COL6A6, ITGB8, PPP1R12A, COL6A2, COL6A1, PDGFD, AKT3, FN1, COL4A2, COL4A1, FLT1, VAV3, TNXB, MET, ITGA1, FLNC, FLNB, COL5A2, COL5A1, KDR, LAMA2, LAMA4, ITGA6, PDGFRA, COL1A2, GRLF1, PDGFRB, LAMC1, COL1A1 |
| Vascular smooth muscle contraction | 1.60E-02 | PPP1R12B, MRVI1, GNA12, PRKG1, ARHGEF12, ITPR1, ITPR2, ADCY9, AGTR1A, PPP1R12A, GUCY1A3, ADRA1A, GUCY1B3, GNAS, PLCB1, ADRA1D                                                                                                                    |

## Appendix Table 2

### Adult PG Enriched Biological Pathways and Associated Genes

| Term                           | P-Value  | Genes                                                                                                                                                                                                                       |
|--------------------------------|----------|-----------------------------------------------------------------------------------------------------------------------------------------------------------------------------------------------------------------------------|
| Cell adhesion molecules (CAMs) | 1.17E-09 | ITGAL, CLDN7, CD8A, CLDN4, CLDN3, H2-D1, ITGB2, VCAM1, ITGB7, CD22, CD4, SELPLG, H2-K1, ICAM1, H2-Q10, ICOSL, CD8B1, H2-M3, SELL, CLDN22, H2-DMB1, H2-AB1, CD40, H2-DMB2, CD86, H2-OA, H2-EB1, H2-OB, H2-AA, H2-T23, H2-DMA |
| N-Glycan biosynthesis          | 1.35E-02 | MGAT4A, ALG1, ALG3, DAD1, MAN1A, DPM2, ALG5, MAN1C1                                                                                                                                                                         |
| Endocytosis                    | 1.85E-02 | H2-K1, GIT1, STAMBP, EPN3, IL2RB, H2-Q10, H2-M3, RAB4A, H2-D1, PIP5K1B, VPS37B, CBLC, ADRB3, SMAP2, CXCR4, ACAP1, H2-T23, IL2RG, EGF, EHD3                                                                                  |

### Appendix Table 3

#### Young SMG Enriched Biological Pathways and Associated Genes

| Term                  | P-Value  | Genes                                                                                                                       |
|-----------------------|----------|-----------------------------------------------------------------------------------------------------------------------------|
| N-Glycan biosynthesis | 5.66E-04 | MGAT4A, MGAT3, GLT28D2, ALG3, RPN1, DPM2, ALG5, ALG6, RPN2, ALG14                                                           |
| Tight junction        | 7.03E-04 | CLDN8, PRKCZ, CLDN7, INADL, MAGI3, OCLN, CLDN4, MAGI1, CLDN3, CRB3, PRKCD, SRC, LLGL2, IGSF5, CGN, PCP4, CLDN1, MYH14, TJP3 |
| O-Glycan biosynthesis | 2.42E-03 | ST3GAL1, GALNT3, C1GALT1C1, GALNT10, GALNT7, GALNT5, GALNT12                                                                |
| Protein export        | 6.76E-03 | SRPR, SRP54C, SRP19, SRP9                                                                                                   |

## Appendix Table 4

### Young PG Enriched Biological Pathways and Associated Genes

| Term                             | P-Value  | Genes                                                                                                                                                                                                                                                                        |
|----------------------------------|----------|------------------------------------------------------------------------------------------------------------------------------------------------------------------------------------------------------------------------------------------------------------------------------|
| ECM-receptor interaction         | 3.08E-04 | TNXB, COL3A1, ITGA11, VTN, ITGA4, ITGB3, COL5A3, COL5A1, SDC3, VWF, ITGA9, LAMA4, CD36, ITGA5, ITGB7, ITGA7, COL1A2, RELN, COL1A1, THBS3, ITGA2B, SPP1, THBS4, FN1                                                                                                           |
| Calcium signaling pathway        | 1.52E-02 | ADCY3, PHKA2, ADCY4, ADCY7, TNNC2, ADORA2A, TNNC1, ITPKA, EDNRB, ADRB3, ATP2B4, PDE1B, PTK2B, PDE1A, PLCD3, NOS3, PRKACA, CAMK2A, PLCB2, PTGER1, PTGER3, SLC25A4, PHKG1, MYLK2, CACNA1S, PRKCB, ITPR2, P2RX5, CD38, AGTR1A, ATP2A1, RYR1, ADRA1A, PDGFRB, PTAFR, ADRA1D, F2R |
| Glycerophospholipid metabolism   | 5.11E-02 | GPD2, GPD1, CRLS1, CHKB, DGKH, PNPLA3, AGPAT6, DGKD, GNPAT, PHOSPHO1, AGPAT4, AGPAT3, GPAM, PLA2G2D, AGPAT2                                                                                                                                                                  |
| Regulation of actin cytoskeleton | 8.17E-02 | ITGAL, PDGFB, SSH1, MRAS, SSH2, ITGA11, ITGB2, ITGB3, ITGAM, RAC2, ITGB7, PIK3R5, MSN, FGF2, FGD3, FN1, ARHGEF1, ARHGEF6, PIK3CD, MYLK2, MYLPF, NCKAP1L, ACTN2, ACTN3, ITGA4, WAS, VAV1, ITGA9, ITGA5, ITGA7, CYFIP2, PDGFRB, PIP4K2A, ITGA2B, MYH10, PIP4K2B, F2R           |

## Appendix Table 5

### SMG Enriched Biological Pathways and Associated Genes

| Term                                        | P-Value  | Genes                                                                                                                                                                                                                                                                                                                                                         |
|---------------------------------------------|----------|---------------------------------------------------------------------------------------------------------------------------------------------------------------------------------------------------------------------------------------------------------------------------------------------------------------------------------------------------------------|
| Focal adhesion                              | 7.57E-05 | PRKCA, VAV3, MET, MYL9, LAMB3, ITGA6, ITGA8, VEGFA, ITGB6, PPP1R12A, LAMC2, PAK1, PDGFD, THBS1, EGF, PIK3R3, MYLK                                                                                                                                                                                                                                             |
| Gastric acid secretion                      | 4.72E-04 | PRKCA, KCNJ16, KCNJ15, CAMK2D, CFTR, KCNQ1, CALM2, MYLK, ITPR1                                                                                                                                                                                                                                                                                                |
| Synaptic vesicle cycle                      | 9.70E-04 | ATP6V1A, STX3, ATP6V1E1, STXBP1, ATP6V1H, ATP6V1G3, UNC13B, ATP6V0D2                                                                                                                                                                                                                                                                                          |
| Protein processing in endoplasmic reticulum | 1.22E-03 | ATF6, HYOU1, HSP90B1, PDIA3, CKAP4, PDIA6, PDIA4, ERO1L, HSPA5, CALR, DDIT3, SEC23B, UBE2E1                                                                                                                                                                                                                                                                   |
| Metabolic pathways                          | 1.51E-03 | ALPL, ME3, GCLC, SGMS2, ENPP1, HEXB, UPP1, HK1, UPP2, GGT1, ANPEP, CKB, GSS, ALDH1A1, ST3GAL5, INPP5J, ST3GAL4, DHCR7, CKMT1, PAFAH1B3, GALC, PNPO, GALE, PAPSS1, ATP6V0D2, BDH1, ACSL3, SHMT1, PLD1, MOCS2, NOS1, PDXK, CMAS, PIK3C2A, PGAP1, ATP6V1H, ALDH3B2, LPIN2, ATP6V1A, ACSM1, UOX, ATP6V1E1, PI4K2A, ATP6V1G3, EXT1, IPPK, ABO, DEGS1, PYGB, ALOX12 |
| Thyroid hormone synthesis                   | 1.99E-03 | PRKCA, GPX1, FXYD2, HSP90B1, DUOXA2, HSPA5, PDIA4, ITPR1                                                                                                                                                                                                                                                                                                      |
| Tight junction                              | 2.07E-03 | CLDN8, CLDN7, CTTN, OCLN, CLDN4, CLDN1, MYH11, PPP2R2C, MYL9                                                                                                                                                                                                                                                                                                  |
| Proteoglycans in cancer                     | 2.09E-03 | PRKCA, MET, TIMP3, ITPR1, WNT4, CTTN, ANK3, MAPK13, VEGFA, PPP1R12A, CAMK2D, PAK1, PIK3R3, THBS1                                                                                                                                                                                                                                                              |
| Glutathione metabolism                      | 2.67E-03 | GSS, GPX1, GSTA4, GCLC, GSTK1, ANPEP, GGT1                                                                                                                                                                                                                                                                                                                    |
| Leukocyte transendothelial migration        | 3.19E-03 | PRKCA, CLDN8, CLDN7, OCLN, VAV3, CLDN4, MAPK13, CLDN1, PIK3R3, MYL9                                                                                                                                                                                                                                                                                           |



## Appendix Table 6

### PG Enriched Biological Pathways and Associated Genes

| Term                                        | P-Value  | Genes                                                                                                                                                                                                                  |
|---------------------------------------------|----------|------------------------------------------------------------------------------------------------------------------------------------------------------------------------------------------------------------------------|
| Metabolic pathways                          | 5.23E-04 | IMPA2, GALNT1, GALNT6, ACOT1, GLB1, ASAH2, ARG1, INPP5K, ARG2, PLA2G12A, GALNS, FASN, GCNT1, GALNT12, GPT2, B4GALT1, AMY1, SHMT2, ADSSL1, COX8B, AK1, UGCG, CDO1, MAN2A2, CD38, GLUL, PCX, CYP27A1, RRM2, PLA2G7, GPAM |
| Arginine biosynthesis                       | 1.78E-03 | ARG1, GLUL, ARG2, GPT2                                                                                                                                                                                                 |
| Biosynthesis of amino acids                 | 2.99E-03 | ARG1, PCX, GLUL, SHMT2, ARG2, GPT2                                                                                                                                                                                     |
| Mucin type O-Glycan biosynthesis            | 5.52E-03 | GALNT1, GALNT6, GALNT12, GCNT1                                                                                                                                                                                         |
| Alanine, aspartate and glutamate metabolism | 1.20E-02 | GLUL, ADSSL1, GPT2, DDO                                                                                                                                                                                                |
| PPAR signaling pathway                      | 2.00E-02 | SLC27A1, CYP27A1, FABP3, DBI, ANGPTL4                                                                                                                                                                                  |
| Transcriptional misregulation in cancer     | 6.34E-02 | CEBPA, CDKN2C, TGFB2, FOXO1, ZBTB16, MLF1                                                                                                                                                                              |
| Renin secretion                             | 6.47E-02 | ACE, CALML3, PDE3B, AQP1                                                                                                                                                                                               |
| Lysosome                                    | 7.41E-02 | CTSL, CTSZ, GALNS, CTSB, GLB1                                                                                                                                                                                          |
| Renin-angiotensin system                    | 7.55E-02 | ACE, PRCP, ENPEP                                                                                                                                                                                                       |

## Appendix Table 7

### Cluster 1

| Gene Name     | p-value  | log <sub>2</sub> FoldChange |
|---------------|----------|-----------------------------|
| Bpifa2        | 3.80E-12 | 0.97746                     |
| Smr3a         | 1.14E-09 | 1.0802                      |
| Ttr           | 2.27E-09 | 0.59636                     |
| Crisp1        | 6.43E-09 | 0.90869                     |
| Ggh           | 1.14E-08 | 0.89189                     |
| Esp8          | 1.86E-08 | 0.42245                     |
| Prpmp5        | 6.21E-08 | 0.60408                     |
| Amy1          | 8.79E-08 | 0.9223                      |
| Prb1          | 1.32E-07 | 0.5842                      |
| 2310057J18Rik | 1.59E-07 | 0.84237                     |
| Cldn22        | 1.76E-07 | 0.40811                     |
| Aqp5          | 5.00E-07 | 0.39226                     |
| Cst10         | 6.76E-07 | 0.76781                     |
| Bglap3        | 7.41E-07 | 0.92258                     |
| Tcn2          | 9.67E-07 | 0.53091                     |
| Pip           | 1.46E-06 | 0.73257                     |
| Chia1         | 1.56E-06 | 0.70531                     |
| Dnase1        | 2.01E-06 | 0.64281                     |
| A630073D07Rik | 2.70E-06 | 0.41121                     |
| Wfdc12        | 7.39E-06 | 0.80798                     |
| Oit1          | 1.76E-05 | 0.26062                     |
| Kcnn4         | 1.92E-05 | 0.35427                     |
| Eif4ebp1      | 2.22E-05 | 0.32079                     |
| Lpo           | 2.38E-05 | 0.34643                     |
| Car6          | 3.68E-05 | 0.97089                     |
| Gm8882        | 3.94E-05 | 0.3498                      |
| Scgb2b27      | 4.80E-05 | 0.31688                     |
| Prol1         | 5.42E-05 | 0.7302                      |
| Bglap2        | 8.96E-05 | 0.2878                      |
| Rnase1        | 9.78E-05 | 0.28569                     |
| Fxyd3         | 1.40E-04 | 0.2667                      |
| Asns          | 2.70E-04 | 0.34328                     |
| BC037156      | 1.67E-03 | 0.52064                     |
| Mup5          | 4.70E-03 | 0.56732                     |

## Cluster 2

| Gene Name     | p-value  | log <sub>2</sub> FoldChange | Gene Name | p-value  | log <sub>2</sub> FoldChange |
|---------------|----------|-----------------------------|-----------|----------|-----------------------------|
| Etv1          | 5.11E-16 | 0.76401                     | Ttr       | 5.83E-07 | 0.355279                    |
| Gm8882        | 3.17E-13 | 0.852932                    | Mup5      | 6.06E-07 | 0.32702                     |
| Fam174b       | 2.22E-12 | 0.265877                    | Pla2g12a  | 8.96E-07 | 0.272339                    |
| Prb1          | 7.18E-12 | 0.967873                    | Esp8      | 1.59E-06 | 0.408442                    |
| Bhlha15       | 1.10E-11 | 0.258833                    | Car6      | 1.76E-06 | 0.91574                     |
| Cldn22        | 2.77E-11 | 0.60247                     | Npdc1     | 2.18E-06 | 0.279464                    |
| Lpo           | 4.89E-11 | 0.722049                    | Smr3a     | 3.13E-06 | 0.791056                    |
| Kcnn4         | 8.46E-11 | 0.701993                    | Bpifa2    | 3.83E-06 | 0.769342                    |
| 2310057J18Rik | 1.75E-10 | 1.000129                    | Agt       | 3.87E-06 | 0.382662                    |
| Lrrc26        | 2.67E-10 | 0.514151                    | Wfdc12    | 4.14E-06 | 0.978943                    |
| Cldn10        | 4.74E-10 | 0.337678                    | Fxyd3     | 4.16E-06 | 0.335482                    |
| Crisp1        | 1.11E-09 | 0.967346                    | Scgb2b27  | 5.71E-06 | 0.433177                    |
| Prpmp5        | 1.27E-09 | 0.819824                    | Eif4ebp1  | 1.58E-05 | 0.299059                    |
| Aqp5          | 1.72E-09 | 0.572292                    | Tmed3     | 2.25E-05 | 0.270467                    |
| Cracr2b       | 1.84E-09 | 0.341797                    | BC037156  | 3.05E-05 | 0.498224                    |
| Rap1gap       | 2.53E-09 | 0.255599                    | Scgb1b27  | 3.45E-05 | 0.300593                    |
| Tcn2          | 3.63E-09 | 0.66677                     | Reep5     | 3.44E-04 | 0.289475                    |
| Cited4        | 3.85E-09 | 0.490395                    | Pdcd4     | 1.38E-03 | 0.314139                    |
| Dnase1        | 4.33E-09 | 0.986079                    | Bglap3    | 3.51E-03 | 0.267354                    |
| Pax9          | 4.89E-09 | 0.282258                    |           |          |                             |
| Cst10         | 7.97E-09 | 0.930543                    |           |          |                             |
| Pip           | 9.58E-09 | 0.904632                    |           |          |                             |
| Oit1          | 1.86E-08 | 0.330781                    |           |          |                             |
| Slc12a2       | 1.96E-08 | 0.322672                    |           |          |                             |
| Bglap2        | 2.42E-08 | 0.28891                     |           |          |                             |
| Amy1          | 2.76E-08 | 0.894856                    |           |          |                             |
| 5330417C22Rik | 2.79E-08 | 0.25384                     |           |          |                             |
| Fkbp11        | 3.54E-08 | 0.373573                    |           |          |                             |
| Folr1         | 3.66E-08 | 0.319765                    |           |          |                             |
| Ggh           | 4.52E-08 | 0.862705                    |           |          |                             |
| Pigr          | 9.09E-08 | 0.293315                    |           |          |                             |
| A630073D07Rik | 1.30E-07 | 0.517784                    |           |          |                             |
| Pdk4          | 1.85E-07 | 0.356715                    |           |          |                             |
| Chia1         | 1.98E-07 | 0.820489                    |           |          |                             |
| Chchd10       | 2.60E-07 | 0.311779                    |           |          |                             |

### Cluster 3

| Gene Name     | p-value  | log <sub>2</sub> FoldChange |
|---------------|----------|-----------------------------|
| Bpifa2        | 6.25E-18 | 1.06667                     |
| Crisp1        | 2.55E-12 | 0.963969                    |
| Prpmp5        | 3.13E-12 | 0.717456                    |
| Amy1          | 5.24E-12 | 1.028137                    |
| Prb1          | 6.99E-12 | 0.721493                    |
| Smr3a         | 2.53E-11 | 1.085898                    |
| Ggh           | 3.05E-11 | 0.93153                     |
| Pip           | 1.00E-09 | 0.816554                    |
| Wfdc12        | 1.91E-09 | 0.807078                    |
| Cst10         | 4.41E-09 | 0.829971                    |
| 2310057J18Rik | 1.04E-08 | 0.805311                    |
| Chia1         | 2.75E-08 | 0.665569                    |
| Car6          | 3.32E-08 | 0.949799                    |
| Gm8882        | 5.62E-08 | 0.50145                     |
| A630073D07Rik | 7.43E-08 | 0.500864                    |
| Scgb2b27      | 3.66E-07 | 0.733093                    |
| Scgb1b27      | 5.89E-07 | 0.81077                     |
| Rnase1        | 1.37E-06 | 0.353941                    |
| BC037156      | 7.61E-06 | 0.495629                    |
| Dnase1        | 1.23E-05 | 0.381593                    |
| Lpo           | 3.66E-05 | 0.27077                     |
| Nucb2         | 1.08E-04 | 0.281538                    |
| Cldn22        | 2.02E-04 | 0.27054                     |
| Tcn2          | 2.06E-04 | 0.333262                    |
| Oit1          | 2.30E-04 | 0.265367                    |
| Esp8          | 6.45E-04 | 0.318824                    |

#### Cluster 4

| Gene Name     | p-value  | log <sub>2</sub> FoldChange | Gene Name     | p-value  | log <sub>2</sub> FoldChange |
|---------------|----------|-----------------------------|---------------|----------|-----------------------------|
| Pdk4          | 1.02E-17 | 0.67359                     | Cst10         | 3.65E-07 | 0.803918                    |
| Etv1          | 5.38E-17 | 0.906218                    | Fkbp11        | 3.67E-07 | 0.311384                    |
| Tacc2         | 9.39E-15 | 0.443686                    | Nucb2         | 3.71E-07 | 0.342719                    |
| Lpo           | 9.91E-15 | 1.148157                    | Nupr1         | 4.43E-07 | 0.438139                    |
| Cldn3         | 1.87E-14 | 0.346377                    | Foxo3         | 4.52E-07 | 0.273979                    |
| Slc12a2       | 2.66E-14 | 0.796938                    | Gadd45g       | 4.59E-07 | 0.413721                    |
| Cracr2b       | 3.26E-14 | 0.536924                    | Cldn22        | 4.74E-07 | 0.498922                    |
| Kcnn4         | 4.95E-13 | 0.860204                    | Trabd         | 4.87E-07 | 0.351555                    |
| Syne4         | 5.04E-13 | 0.405214                    | Ttr           | 8.00E-07 | 0.414781                    |
| Dnase1        | 2.41E-12 | 1.328259                    | Prb1          | 9.45E-07 | 0.49776                     |
| Lmf1          | 3.25E-12 | 0.316562                    | Rnase1        | 1.41E-06 | 0.274507                    |
| Cdo1          | 3.35E-12 | 0.34403                     | A630073D07Rik | 1.47E-06 | 0.678627                    |
| Krt23         | 5.65E-12 | 0.280759                    | Bglap         | 1.86E-06 | 0.315655                    |
| Lrrc26        | 1.11E-11 | 0.651474                    | Mcf2          | 2.69E-06 | 0.27642                     |
| Krt8          | 1.43E-11 | 0.352508                    | Amy1          | 3.20E-06 | 0.669679                    |
| Pigr          | 4.78E-11 | 0.83473                     | lfrd2         | 4.69E-06 | 0.256525                    |
| Aqp5          | 8.34E-11 | 0.650328                    | Ggh           | 5.65E-06 | 0.638917                    |
| Tcn2          | 1.19E-10 | 0.767448                    | Gm8882        | 6.02E-06 | 0.325332                    |
| Bglap2        | 1.86E-10 | 0.451313                    | Bglap3        | 6.10E-06 | 0.647985                    |
| 5330417C22Rik | 3.29E-10 | 0.426961                    | Prpmp5        | 6.13E-06 | 0.347583                    |
| Cited4        | 3.35E-10 | 0.567789                    | Bckdk         | 7.70E-06 | 0.301566                    |
| Pax9          | 4.45E-10 | 0.4115                      | Wfdc12        | 1.64E-05 | 0.522306                    |
| Plet1         | 6.75E-10 | 0.375371                    | Esp8          | 1.73E-05 | 0.291805                    |
| Furin         | 9.15E-10 | 0.551509                    | Eif4ebp1      | 2.19E-05 | 0.338164                    |
| Atp9a         | 9.86E-10 | 0.278824                    | Pip           | 2.54E-05 | 0.703592                    |
| Rab3d         | 1.01E-09 | 0.293125                    | St3gal6       | 2.66E-05 | 0.299485                    |
| Pgp           | 1.37E-09 | 0.426151                    | 2310057J18Rik | 2.80E-05 | 0.702872                    |
| Phlda1        | 1.59E-09 | 0.5202                      | Chka          | 3.22E-05 | 0.278703                    |
| Npdc1         | 6.85E-09 | 0.39815                     | Neat1         | 3.31E-05 | 0.271028                    |
| Rap1gap       | 7.96E-09 | 0.295935                    | Tmed3         | 5.26E-05 | 0.293142                    |
| Chpt1         | 8.28E-09 | 0.369757                    | Crisp1        | 6.21E-05 | 0.457791                    |
| Chia1         | 8.57E-09 | 1.188493                    | Scgb2b27      | 6.44E-05 | 0.417442                    |
| Bhlha15       | 1.47E-08 | 0.252836                    | Map3k1        | 8.59E-05 | 0.28924                     |
| Ildr1         | 1.51E-08 | 0.280742                    | Bpifa2        | 8.67E-05 | 0.676153                    |
| Asns          | 4.19E-08 | 0.310078                    | Agt           | 9.89E-05 | 0.377904                    |
| Wwc1          | 4.74E-08 | 0.281018                    | Smr3a         | 1.71E-04 | 0.659113                    |
| Folr1         | 1.07E-07 | 0.276497                    | P4hb          | 1.74E-04 | 0.374738                    |
| Fxyd3         | 1.38E-07 | 0.482544                    | Reep5         | 1.39E-03 | 0.279059                    |
| BC037156      | 1.56E-07 | 0.762544                    | Car6          | 1.71E-03 | 0.546329                    |

### Cluster 5

| Gene Name | p-value  | log <sub>2</sub> FoldChange | Gene Name     | p-value  | log <sub>2</sub> FoldChange |
|-----------|----------|-----------------------------|---------------|----------|-----------------------------|
| Slc46a1   | 6.24E-11 | 0.339384                    | Kcns1         | 7.48E-04 | 0.252669                    |
| Prol1     | 7.38E-07 | 0.427599                    | Pdcd4         | 9.51E-04 | 0.715549                    |
| Mlph      | 2.52E-06 | 0.423956                    | Smr3a         | 1.18E-03 | 0.930145                    |
| Pigr      | 2.59E-06 | 0.978306                    | Gm8882        | 1.87E-03 | 0.332147                    |
| Amy1      | 3.20E-06 | 0.669679                    | A630073D07Rik | 2.27E-03 | 0.549297                    |
| Fkbp11    | 4.88E-06 | 0.488252                    | Reep5         | 2.37E-03 | 0.397803                    |
| Fuom      | 7.22E-06 | 0.372479                    | Tcn2          | 2.75E-03 | 0.509986                    |
| Shisa2    | 1.11E-05 | 0.257162                    | Pax9          | 2.85E-03 | 0.300955                    |
| Syne4     | 1.18E-05 | 0.293468                    | Mcf2          | 3.00E-03 | 0.283553                    |
| Homer2    | 1.65E-05 | 0.301317                    | Agt           | 3.63E-03 | 0.260899                    |
| BC037156  | 1.86E-05 | 1.024192                    | Scgb1b27      | 3.84E-03 | 1.130134                    |
| Wfdc12    | 1.99E-05 | 1.26558                     | Tmed3         | 4.09E-03 | 0.392755                    |
| Barx2     | 2.55E-05 | 0.357158                    | Car6          | 4.32E-03 | 0.904162                    |
| Chpt1     | 2.56E-05 | 0.406236                    | Nucb2         | 4.64E-03 | 0.385876                    |
| Pip       | 3.06E-05 | 1.008369                    | Ttr           | 7.02E-03 | 0.34964                     |
| Tmem238   | 3.45E-05 | 0.346651                    | Chchd10       | 8.60E-03 | 0.256504                    |
| Prmp5     | 5.06E-05 | 0.655926                    |               |          |                             |
| Lpo       | 5.78E-05 | 0.757013                    |               |          |                             |
| Slc5a8    | 6.83E-05 | 0.269303                    |               |          |                             |
| Etv1      | 8.44E-05 | 0.274472                    |               |          |                             |
| Tpd52l1   | 8.62E-05 | 0.296256                    |               |          |                             |
| Cst10     | 1.08E-04 | 0.986546                    |               |          |                             |
| Oit1      | 1.24E-04 | 0.371455                    |               |          |                             |
| Bglap2    | 1.34E-04 | 0.453779                    |               |          |                             |
| Lrrc26    | 1.39E-04 | 0.561351                    |               |          |                             |
| Aqp5      | 1.73E-04 | 0.619067                    |               |          |                             |
| Kcnn4     | 1.83E-04 | 0.580212                    |               |          |                             |
| Rab3d     | 2.38E-04 | 0.293109                    |               |          |                             |
| Cldn22    | 2.95E-04 | 0.587805                    |               |          |                             |
| Hid1      | 3.11E-04 | 0.280962                    |               |          |                             |
| Folr1     | 4.54E-04 | 0.274222                    |               |          |                             |
| Slc12a2   | 4.57E-04 | 0.306585                    |               |          |                             |
| Fxyd3     | 4.79E-04 | 0.491026                    |               |          |                             |
| Scgb2b27  | 5.27E-04 | 1.249707                    |               |          |                             |
| Cdo1      | 6.40E-04 | 0.274931                    |               |          |                             |
| Ppp1r1b   | 6.85E-04 | 0.259125                    |               |          |                             |
| Ckmt1     | 7.46E-04 | 0.288072                    |               |          |                             |

### Cluster 6

| Gene Name     | p-value  | log <sub>2</sub> FoldChange | Gene Name | p-value  | log <sub>2</sub> FoldChange |
|---------------|----------|-----------------------------|-----------|----------|-----------------------------|
| Bglap         | 9.15E-10 | 0.34581                     | Cited4    | 2.02E-04 | 0.315226                    |
| Cldn22        | 2.42E-09 | 0.598973                    | Eif4ebp1  | 2.50E-04 | 0.331134                    |
| A630073D07Rik | 2.54E-09 | 0.885416                    | Smpdl3a   | 2.00E-03 | 0.282476                    |
| Gjb1          | 4.35E-09 | 0.304975                    |           |          |                             |
| Pip           | 5.32E-09 | 1.130925                    |           |          |                             |
| Ggh           | 6.30E-09 | 1.030604                    |           |          |                             |
| 2310057J18Rik | 7.17E-09 | 0.983039                    |           |          |                             |
| Gm8882        | 1.15E-08 | 0.589146                    |           |          |                             |
| Bglap2        | 2.67E-08 | 0.573052                    |           |          |                             |
| Prb1          | 3.66E-08 | 0.682822                    |           |          |                             |
| Cst10         | 5.11E-08 | 0.947393                    |           |          |                             |
| Mup5          | 6.09E-08 | 0.743427                    |           |          |                             |
| Scgb2b27      | 1.43E-07 | 1.569407                    |           |          |                             |
| Prmp5         | 1.86E-07 | 0.926265                    |           |          |                             |
| Folr1         | 4.09E-07 | 0.432987                    |           |          |                             |
| Amy1          | 4.32E-07 | 0.891682                    |           |          |                             |
| Prol1         | 7.38E-07 | 0.427599                    |           |          |                             |
| Crisp1        | 1.02E-06 | 0.92841                     |           |          |                             |
| Copz2         | 1.52E-06 | 0.33093                     |           |          |                             |
| Fxyd3         | 1.76E-06 | 0.442278                    |           |          |                             |
| Ttr           | 2.10E-06 | 0.368115                    |           |          |                             |
| Scgb1b27      | 2.63E-06 | 1.943153                    |           |          |                             |
| Bpifa2        | 3.52E-06 | 0.801353                    |           |          |                             |
| Wfdc12        | 4.30E-06 | 0.880102                    |           |          |                             |
| Tcn2          | 4.32E-06 | 0.501582                    |           |          |                             |
| Chia1         | 4.49E-06 | 0.902556                    |           |          |                             |
| Esp8          | 7.23E-06 | 0.326646                    |           |          |                             |
| Car6          | 9.75E-06 | 0.890933                    |           |          |                             |
| Dnase1        | 1.07E-05 | 0.764745                    |           |          |                             |
| Aqp5          | 1.27E-05 | 0.422672                    |           |          |                             |
| Agt           | 1.44E-05 | 0.355792                    |           |          |                             |
| Lpo           | 2.53E-05 | 0.462915                    |           |          |                             |
| BC037156      | 3.35E-05 | 0.90461                     |           |          |                             |
| Kcnn4         | 6.03E-05 | 0.410056                    |           |          |                             |
| Smr3a         | 1.08E-04 | 0.712058                    |           |          |                             |
| Nucb2         | 1.51E-04 | 0.274056                    |           |          |                             |
| Lrrc26        | 1.82E-04 | 0.259807                    |           |          |                             |

### Cluster 7

| Gene Name | p-value  | log <sub>2</sub> FoldChange | Gene Name     | p-value  | log <sub>2</sub> FoldChange |
|-----------|----------|-----------------------------|---------------|----------|-----------------------------|
| Cldn4     | 3.68E-38 | 2.928547                    | Serinc2       | 6.87E-16 | 0.4354                      |
| Esp18     | 1.05E-33 | 1.055194                    | Erc1          | 8.53E-16 | 0.560559                    |
| Gpx2      | 2.84E-31 | 0.673394                    | Prkci         | 1.16E-15 | 0.634238                    |
| S100a14   | 3.76E-31 | 0.582089                    | Itgb4         | 1.63E-15 | 1.029064                    |
| Tmem171   | 3.82E-30 | 0.58437                     | Cldn1         | 2.60E-15 | 0.897233                    |
| Lancl3    | 3.82E-30 | 0.346175                    | Arhgef17      | 2.76E-15 | 0.345579                    |
| Krt7      | 1.77E-28 | 1.86303                     | 5730559C18Rik | 7.07E-15 | 0.300331                    |
| Ppargc1a  | 1.90E-28 | 1.419873                    | Sox4          | 7.63E-15 | 1.638386                    |
| Tfcp2l1   | 2.20E-28 | 1.478233                    | Etv6          | 8.27E-15 | 0.843492                    |
| F2rl1     | 4.33E-28 | 0.812924                    | Fat1          | 1.50E-14 | 0.464536                    |
| Sgms2     | 3.23E-27 | 0.939501                    | Lgr4          | 1.77E-14 | 0.401191                    |
| Wnt5b     | 1.54E-24 | 0.537678                    | Auts2         | 1.87E-14 | 0.954598                    |
| Cdcp1     | 2.63E-24 | 0.850172                    | Myo1b         | 1.87E-14 | 0.780226                    |
| Mal2      | 2.88E-24 | 0.259003                    | Twsg1         | 3.39E-14 | 0.826197                    |
| Hp        | 3.77E-24 | 0.511067                    | Lamc2         | 5.61E-14 | 0.851563                    |
| Dennd2c   | 5.99E-21 | 0.536369                    | Gfra3         | 8.58E-14 | 0.822187                    |
| Fhdc1     | 8.39E-21 | 0.45553                     | Shroom3       | 9.98E-14 | 0.573585                    |
| Ocln      | 9.19E-21 | 0.62216                     | Efna5         | 1.04E-13 | 0.417454                    |
| Ntng1     | 1.67E-20 | 0.356504                    | Gm26532       | 1.38E-13 | 0.95359                     |
| Esrrg     | 2.43E-20 | 0.256822                    | lgsf3         | 1.71E-13 | 1.032142                    |
| Tuft1     | 5.32E-19 | 0.354735                    | Nedd4l        | 1.93E-13 | 0.657577                    |
| Wnt10a    | 7.45E-19 | 0.602474                    | Met           | 2.93E-13 | 0.478501                    |
| Cdh1      | 1.12E-18 | 1.773091                    | Epha2         | 3.57E-13 | 0.701907                    |
| Ptn       | 1.13E-18 | 0.771619                    | Pkp2          | 3.86E-13 | 0.690289                    |
| Dsp       | 1.15E-18 | 1.191239                    | Mast4         | 9.16E-13 | 1.437669                    |
| Wfdc2     | 3.25E-18 | 1.589543                    | Hbegf         | 1.00E-12 | 1.383982                    |
| Slc2a1    | 3.71E-18 | 0.879556                    | Gtf2ird1      | 1.50E-12 | 0.316064                    |
| Elovl7    | 7.99E-18 | 0.453258                    | Cx3cl1        | 2.07E-12 | 0.878096                    |
| Tead1     | 1.04E-17 | 0.848771                    | Anxa3         | 2.23E-12 | 0.771873                    |
| Gm20186   | 1.53E-17 | 1.21696                     | Fam83h        | 2.78E-12 | 0.426017                    |
| Ucma      | 1.57E-17 | 1.164192                    | Sfn           | 4.01E-12 | 2.240991                    |
| Mcam      | 2.30E-17 | 0.268512                    | Hmga1         | 5.05E-12 | 0.364299                    |
| Sprr1a    | 3.06E-17 | 0.530901                    | Olfml2a       | 5.05E-12 | 0.276902                    |
| Bcam      | 5.44E-17 | 0.695572                    | Nbea          | 5.10E-12 | 0.429352                    |
| Plagl1    | 1.04E-16 | 0.538685                    | Krt14         | 6.25E-12 | 1.09187                     |
| Cxcl17    | 2.69E-16 | 1.95048                     | Cas21         | 9.45E-12 | 0.796974                    |
| Celsr1    | 3.24E-16 | 0.409296                    | Cxadr         | 1.35E-11 | 1.704223                    |
| Foxq1     | 3.56E-16 | 1.058559                    | Slc30a1       | 1.63E-11 | 0.350411                    |
| Irx3      | 4.84E-16 | 0.541456                    | Tnfrsf12a     | 1.71E-11 | 1.440007                    |



| Gene Name     | p-value  | log <sub>2</sub> FoldChange | Gene Name | p-value  | log <sub>2</sub> FoldChange |
|---------------|----------|-----------------------------|-----------|----------|-----------------------------|
| Erb2ip        | 1.71E-11 | 0.878363                    | Stx3      | 4.76E-10 | 0.430637                    |
| 2010111I01Rik | 1.72E-11 | 1.156886                    | Elf3      | 5.57E-10 | 1.098196                    |
| F11r          | 1.87E-11 | 1.04887                     | Reep3     | 6.39E-10 | 0.969782                    |
| Lcn2          | 2.24E-11 | 0.580513                    | Tpbp      | 6.97E-10 | 0.915808                    |
| Etl4          | 2.39E-11 | 0.448683                    | Krt18     | 7.00E-10 | 3.324031                    |
| Morc2a        | 2.86E-11 | 0.386079                    | Cep170b   | 7.08E-10 | 0.473095                    |
| Oplah         | 3.04E-11 | 0.289021                    | Bicd2     | 7.49E-10 | 0.398771                    |
| Fbxo32        | 3.04E-11 | 0.609257                    | Yap1      | 7.79E-10 | 0.614913                    |
| Tubb2b        | 3.16E-11 | 0.619543                    | Epcam     | 8.15E-10 | 2.09161                     |
| Farp1         | 3.62E-11 | 0.351697                    | Cdh3      | 8.80E-10 | 0.268918                    |
| Rbpms         | 4.51E-11 | 0.638272                    | Kdm5b     | 1.24E-09 | 0.452427                    |
| Perp          | 5.31E-11 | 1.727769                    | Cldn7     | 1.56E-09 | 1.094073                    |
| Ldhd          | 5.42E-11 | 0.655683                    | Map7      | 1.62E-09 | 0.47644                     |
| Capsl         | 6.65E-11 | 0.299919                    | Nab2      | 1.73E-09 | 0.621896                    |
| St14          | 7.43E-11 | 0.947187                    | Pfkl      | 1.97E-09 | 0.659064                    |
| Mdfi          | 7.51E-11 | 0.480765                    | Bok       | 2.04E-09 | 0.527386                    |
| Tinagl1       | 7.58E-11 | 0.580207                    | Nfib      | 2.09E-09 | 1.22422                     |
| Nmd3          | 7.89E-11 | 0.638147                    | C77080    | 2.23E-09 | 0.756349                    |
| Kctd1         | 8.30E-11 | 0.441481                    | Krt8      | 2.40E-09 | 2.800698                    |
| Vcl           | 8.79E-11 | 0.642434                    | Emp1      | 2.59E-09 | 0.701417                    |
| Anxa1         | 1.01E-10 | 2.094997                    | Uaca      | 2.62E-09 | 0.52807                     |
| Crb3          | 1.17E-10 | 0.851769                    | Egfr      | 3.38E-09 | 0.558174                    |
| Sertad2       | 1.30E-10 | 0.949936                    | Sdc4      | 3.41E-09 | 1.742729                    |
| Fam134b       | 1.31E-10 | 0.99415                     | Iqgap1    | 3.54E-09 | 1.382655                    |
| Runx1         | 1.33E-10 | 1.101026                    | Dusp7     | 3.99E-09 | 0.401359                    |
| Klf5          | 1.48E-10 | 0.962246                    | Otud7b    | 4.09E-09 | 0.396824                    |
| Fosl1         | 1.59E-10 | 1.042735                    | Ppp2ca    | 4.21E-09 | 1.022288                    |
| Phf13         | 1.76E-10 | 0.492827                    | Trip6     | 4.26E-09 | 0.347678                    |
| Plxnb2        | 2.15E-10 | 0.722941                    | Ptprf     | 4.28E-09 | 0.546701                    |
| Mpzl2         | 2.58E-10 | 0.838811                    | Pknx1     | 4.67E-09 | 0.588931                    |
| Rbm47         | 2.66E-10 | 0.916678                    | Rrad      | 4.93E-09 | 1.573601                    |
| Krt17         | 2.87E-10 | 1.359016                    | Tpm1      | 5.39E-09 | 1.101309                    |
| Mex3d         | 3.12E-10 | 0.271921                    | Actn4     | 5.57E-09 | 1.265805                    |
| Wisp1         | 3.48E-10 | 0.452872                    | N4bp3     | 5.61E-09 | 0.369392                    |
| Wnt4          | 3.48E-10 | 0.341634                    | Reps2     | 5.72E-09 | 0.429427                    |
| Serinc5       | 3.49E-10 | 0.418398                    | Cbr2      | 6.06E-09 | 0.456463                    |
| Pvrl3         | 3.68E-10 | 0.293259                    | Vwa5a     | 6.25E-09 | 0.57688                     |
| Fhl2          | 4.13E-10 | 0.809434                    | Epb41l5   | 6.29E-09 | 0.25666                     |
| Krt5          | 4.20E-10 | 0.897603                    | Itch      | 6.33E-09 | 0.57091                     |
| Mllt6         | 4.50E-10 | 0.436603                    | Srf       | 6.77E-09 | 0.674419                    |

| Gene Name     | p-value  | log <sub>2</sub> FoldChange | Gene Name | p-value  | log <sub>2</sub> FoldChange |
|---------------|----------|-----------------------------|-----------|----------|-----------------------------|
| Mycl          | 7.26E-09 | 0.279341                    | Sirt1     | 4.92E-08 | 0.260666                    |
| Ahnak         | 7.38E-09 | 1.362689                    | Net1      | 5.30E-08 | 0.603765                    |
| 0610040J01Rik | 7.40E-09 | 0.406678                    | Ctdspl    | 5.37E-08 | 0.587719                    |
| Lcor          | 8.36E-09 | 0.279482                    | Rtn4      | 5.48E-08 | 1.183812                    |
| Jup           | 8.55E-09 | 0.990272                    | Spin1     | 5.56E-08 | 0.739917                    |
| Cnksr1        | 8.62E-09 | 0.458991                    | Crip2     | 5.90E-08 | 1.049594                    |
| Ncor2         | 9.11E-09 | 0.544369                    | App       | 5.99E-08 | 0.786417                    |
| Cyr61         | 1.02E-08 | 1.401975                    | Tmem176a  | 6.29E-08 | 0.899251                    |
| Zfp142        | 1.11E-08 | 0.282482                    | Ttc3      | 6.76E-08 | 0.649833                    |
| Pacsin2       | 1.17E-08 | 0.591757                    | Kdm1a     | 7.01E-08 | 0.445474                    |
| Map2k3        | 1.25E-08 | 1.152393                    | Svil      | 7.02E-08 | 0.4028                      |
| Dstn          | 1.27E-08 | 1.724226                    | Spint2    | 7.56E-08 | 1.284897                    |
| Plet1         | 1.27E-08 | 1.864286                    | Icam1     | 7.69E-08 | 1.202108                    |
| Ccdc120       | 1.32E-08 | 0.361843                    | Krt10     | 7.78E-08 | 0.435374                    |
| Enpep         | 1.37E-08 | 1.250598                    | Ddr1      | 7.79E-08 | 0.685148                    |
| Mir17hg       | 1.37E-08 | 0.289297                    | Clstn1    | 8.11E-08 | 0.935675                    |
| Hcar2         | 1.47E-08 | 0.263399                    | Plec      | 8.16E-08 | 1.045187                    |
| Wwc2          | 1.52E-08 | 0.312475                    | Smek1     | 8.35E-08 | 0.428782                    |
| Pvrl2         | 1.59E-08 | 0.788874                    | Zkscan17  | 8.78E-08 | 0.303357                    |
| Klhl24        | 1.59E-08 | 0.539955                    | Smoc2     | 8.99E-08 | 0.955523                    |
| Pbx1          | 1.62E-08 | 1.05357                     | Klf4      | 9.15E-08 | 1.071364                    |
| Cd9           | 1.83E-08 | 1.612963                    | Purb      | 9.41E-08 | 0.780249                    |
| Frmd6         | 2.01E-08 | 0.503905                    | Zfp131    | 9.69E-08 | 0.578332                    |
| Nfix          | 2.19E-08 | 0.918372                    | Serpib6a  | 9.86E-08 | 0.616871                    |
| Ptp4a2        | 2.44E-08 | 1.288929                    | Pdgfc     | 1.04E-07 | 0.451312                    |
| Pard6g        | 2.51E-08 | 0.580324                    | Cox8a     | 1.04E-07 | 1.025316                    |
| Klf6          | 2.61E-08 | 1.573319                    | Hras      | 1.14E-07 | 0.696563                    |
| Elmsan1       | 2.64E-08 | 0.377635                    | Timp3     | 1.19E-07 | 1.377316                    |
| Urah          | 3.06E-08 | 0.844085                    | Prkag2    | 1.22E-07 | 0.293517                    |
| Mapk8         | 3.23E-08 | 0.578594                    | Rras      | 1.23E-07 | 0.434289                    |
| Rc3h2         | 3.25E-08 | 0.373704                    | Erlin2    | 1.30E-07 | 0.333623                    |
| Inf2          | 3.68E-08 | 0.315459                    | Evi5      | 1.39E-07 | 0.298411                    |
| Dsg2          | 4.01E-08 | 0.726007                    | Klf10     | 1.41E-07 | 0.718834                    |
| Tsc22d1       | 4.04E-08 | 1.125098                    | Arhgap35  | 1.43E-07 | 0.28484                     |
| B4galt3       | 4.17E-08 | 0.3351                      | Mtf1      | 1.51E-07 | 0.336999                    |
| Zfp704        | 4.19E-08 | 0.358454                    | Cryab     | 1.63E-07 | 1.717595                    |
| Egln3         | 4.36E-08 | 0.480812                    | Msl2      | 1.78E-07 | 0.523827                    |
| Setd2         | 4.40E-08 | 0.582146                    | Pvrl1     | 1.84E-07 | 0.425755                    |
| Tmem176b      | 4.48E-08 | 1.138755                    | Phyh      | 1.84E-07 | 0.728113                    |
| Pgrmc1        | 4.78E-08 | 0.658564                    | Pigp      | 1.88E-07 | 0.569049                    |

| Gene Name | p-value  | log <sub>2</sub> FoldChange | Gene Name     | p-value  | log <sub>2</sub> FoldChange |
|-----------|----------|-----------------------------|---------------|----------|-----------------------------|
| Slc16a2   | 1.94E-07 | 0.273811                    | lrf2bpl       | 4.34E-07 | 0.91856                     |
| Atf3      | 2.01E-07 | 1.406696                    | Trp53inp1     | 4.40E-07 | 0.479355                    |
| Wbscr27   | 2.10E-07 | 0.384502                    | Atn1.1        | 4.63E-07 | 0.553713                    |
| Mpzl3     | 2.15E-07 | 0.4066                      | Clmn          | 4.75E-07 | 0.453156                    |
| Mfn2      | 2.16E-07 | 0.35158                     | Spint1        | 4.76E-07 | 0.569846                    |
| Ptprs     | 2.20E-07 | 0.423761                    | Lsr           | 4.83E-07 | 0.72134                     |
| Vps4b     | 2.21E-07 | 0.653225                    | Nipbl         | 4.85E-07 | 0.439747                    |
| Ppp4r1    | 2.23E-07 | 0.449139                    | Wipf2         | 4.96E-07 | 0.350875                    |
| BC005537  | 2.24E-07 | 0.699687                    | lffo2         | 4.96E-07 | 0.533938                    |
| Neat1     | 2.29E-07 | 1.647708                    | Cpeb2         | 4.96E-07 | 0.404889                    |
| Skp1a     | 2.37E-07 | 0.708555                    | ltgb5         | 5.01E-07 | 0.359203                    |
| Baiap2    | 2.42E-07 | 1.157823                    | Adgrg6        | 5.01E-07 | 0.802581                    |
| Mprlp     | 2.49E-07 | 0.719642                    | Elf2          | 5.18E-07 | 0.438997                    |
| Ddb1      | 2.51E-07 | 0.638276                    | Acsl3         | 5.27E-07 | 0.436226                    |
| Hdac5     | 2.57E-07 | 0.521544                    | Wdr46         | 5.41E-07 | 0.313071                    |
| Actg1     | 2.60E-07 | 1.237598                    | Atp1b1        | 5.45E-07 | 1.377943                    |
| Syne2     | 2.63E-07 | 0.787608                    | Hs6st1        | 5.60E-07 | 0.355127                    |
| S100a11   | 2.66E-07 | 1.303781                    | Tab2          | 5.93E-07 | 0.667524                    |
| Cd24a     | 2.70E-07 | 1.323525                    | Rsf1          | 6.10E-07 | 0.428216                    |
| Atp5a1    | 2.77E-07 | 0.968739                    | ltgav         | 6.12E-07 | 0.605654                    |
| Ndfip2    | 2.77E-07 | 0.728081                    | Azi2          | 6.12E-07 | 0.599404                    |
| Prss8     | 2.83E-07 | 1.069109                    | Npc1          | 6.15E-07 | 0.389685                    |
| Cox4i1    | 2.89E-07 | 0.932665                    | Tiam1         | 6.15E-07 | 0.589572                    |
| Stk40     | 3.01E-07 | 0.775531                    | Mafg          | 6.23E-07 | 0.747245                    |
| Ndufa4    | 3.09E-07 | 0.91375                     | Piezo1        | 6.37E-07 | 0.447063                    |
| Rhou      | 3.31E-07 | 0.993058                    | Uqcr11        | 6.40E-07 | 1.039429                    |
| Slc25a25  | 3.33E-07 | 0.545744                    | Lmo4          | 6.43E-07 | 0.599222                    |
| Mgst1     | 3.40E-07 | 0.536345                    | Thbs1         | 6.64E-07 | 1.44998                     |
| Sox9      | 3.51E-07 | 1.337485                    | Csnk1a1       | 6.93E-07 | 0.840887                    |
| Calm2     | 3.66E-07 | 1.292636                    | 1110059G10Rik | 7.02E-07 | 0.367297                    |
| Mcc       | 3.75E-07 | 0.269946                    | Ly6d          | 7.31E-07 | 1.503323                    |
| Hnrnpab   | 3.80E-07 | 1.160287                    | Rin2          | 7.56E-07 | 0.410793                    |
| Ly6e      | 3.86E-07 | 1.126053                    | Samd4b        | 7.61E-07 | 0.390965                    |
| Cstb      | 3.88E-07 | 1.548849                    | Tagln2        | 7.86E-07 | 1.058257                    |
| Gpx4      | 3.96E-07 | 1.182317                    | Ralgds        | 7.89E-07 | 0.900026                    |
| Casp4     | 3.97E-07 | 0.612148                    | Zc3h18        | 7.90E-07 | 0.421158                    |
| Noct      | 4.03E-07 | 0.832554                    | lgfbp2        | 8.22E-07 | 0.32619                     |
| Cxcl16    | 4.06E-07 | 0.777764                    | Csrp1         | 8.38E-07 | 1.738291                    |
| Ythdf2    | 4.31E-07 | 0.564939                    | Chd3          | 8.43E-07 | 0.703992                    |
| Vsig10    | 4.31E-07 | 0.436667                    | Tgif1         | 8.53E-07 | 0.888328                    |

| Gene Name     | p-value  | log <sub>2</sub> FoldChange | Gene Name | p-value  | log <sub>2</sub> FoldChange |
|---------------|----------|-----------------------------|-----------|----------|-----------------------------|
| Bcl2l1        | 8.61E-07 | 0.532401                    | Ehd4      | 2.45E-06 | 0.649169                    |
| Map1lc3a      | 8.77E-07 | 1.391504                    | Nras      | 2.50E-06 | 0.840936                    |
| Abcc1         | 8.79E-07 | 0.317829                    | Eif3a     | 2.50E-06 | 0.803592                    |
| Amd1          | 9.04E-07 | 0.594503                    | Sik1      | 2.52E-06 | 0.498688                    |
| Mbnl2         | 9.30E-07 | 0.737945                    | Ero1l     | 2.56E-06 | 0.546339                    |
| Gng12         | 9.31E-07 | 0.451307                    | Nebi      | 2.67E-06 | 0.41063                     |
| Mafk          | 9.66E-07 | 0.750586                    | Wipi2     | 2.74E-06 | 0.552476                    |
| Ddah2         | 1.05E-06 | 0.611675                    | Atp1a1    | 2.77E-06 | 1.376076                    |
| Zfand5        | 1.07E-06 | 0.983869                    | Tuba1cA   | 2.79E-06 | 0.750624                    |
| Rnf38         | 1.09E-06 | 0.32776                     | Enpp4     | 2.82E-06 | 0.331526                    |
| Ankrd50       | 1.11E-06 | 0.300358                    | Stat3     | 2.85E-06 | 0.846068                    |
| Nfkb1         | 1.11E-06 | 0.888273                    | Mgat4b    | 3.05E-06 | 0.264476                    |
| Fosb          | 1.12E-06 | 1.520421                    | Klhl21    | 3.07E-06 | 0.943082                    |
| Dot1l         | 1.15E-06 | 0.47944                     | Rtkn      | 3.15E-06 | 0.431008                    |
| S100a10       | 1.19E-06 | 1.091571                    | Aldoa     | 3.17E-06 | 0.895246                    |
| Nt5c2         | 1.19E-06 | 0.364442                    | Gan       | 3.28E-06 | 0.467476                    |
| Arl13b        | 1.19E-06 | 0.396157                    | Jund      | 3.32E-06 | 1.040984                    |
| Wiz           | 1.24E-06 | 0.307417                    | Txnrd1    | 3.32E-06 | 0.540767                    |
| Col17a1       | 1.26E-06 | 0.27731                     | Nr1d2     | 3.45E-06 | 0.423329                    |
| Tes           | 1.27E-06 | 0.523842                    | Zyx       | 3.48E-06 | 0.626193                    |
| Arhgef16      | 1.30E-06 | 0.324384                    | Cox6c     | 3.51E-06 | 0.892324                    |
| Whrn          | 1.30E-06 | 0.274466                    | Gabarapl1 | 3.64E-06 | 0.922896                    |
| Zfhx3         | 1.33E-06 | 0.524323                    | Hivep2    | 3.66E-06 | 0.955479                    |
| Rai14         | 1.36E-06 | 0.25997                     | Foxp1     | 3.74E-06 | 1.204817                    |
| Atp5l         | 1.48E-06 | 0.98098                     | Adgrl2    | 3.76E-06 | 0.372703                    |
| Phc2          | 1.49E-06 | 0.629379                    | Pafah1b3  | 3.78E-06 | 0.418806                    |
| Chka          | 1.50E-06 | 1.069344                    | Rb1cc1    | 3.85E-06 | 0.438299                    |
| Scmh1         | 1.55E-06 | 0.489214                    | Fubp1     | 3.93E-06 | 0.834401                    |
| Bod1          | 1.60E-06 | 0.584517                    | Cep295    | 3.93E-06 | 0.308796                    |
| Ctnnb1        | 1.60E-06 | 1.01392                     | Nhp2      | 4.14E-06 | 0.711864                    |
| Zfp260        | 1.62E-06 | 0.415651                    | Upf1      | 4.15E-06 | 0.515075                    |
| Nedd4         | 1.65E-06 | 0.631703                    | Ptpn9     | 4.29E-06 | 0.312451                    |
| Por           | 1.71E-06 | 0.482155                    | Zbtb20    | 4.31E-06 | 0.678122                    |
| Insig2        | 1.75E-06 | 0.604936                    | Ets2      | 4.38E-06 | 0.781475                    |
| Hbp1          | 1.95E-06 | 0.588084                    | Rhbdf1    | 4.41E-06 | 0.493625                    |
| Mcl1          | 1.97E-06 | 0.85463                     | Minpp1    | 4.41E-06 | 0.376318                    |
| Tgfb1         | 2.05E-06 | 0.572808                    | Ddx5      | 4.55E-06 | 0.922796                    |
| 2010300C02Rik | 2.10E-06 | 0.471584                    | Atp5g3    | 4.71E-06 | 1.021846                    |
| Oser1         | 2.22E-06 | 0.575165                    | Pitpnc1   | 4.76E-06 | 0.723711                    |
| Acsf2         | 2.29E-06 | 0.388243                    | Daam1     | 4.78E-06 | 0.355441                    |

| Gene Name | p-value  | log <sub>2</sub> FoldChange | Gene Name     | p-value  | log <sub>2</sub> FoldChange |
|-----------|----------|-----------------------------|---------------|----------|-----------------------------|
| ErbB3     | 4.82E-06 | 0.407725                    | Tmem127       | 8.97E-06 | 0.374446                    |
| Wls       | 4.92E-06 | 0.602993                    | Tbl3          | 9.15E-06 | 0.369495                    |
| Myh9      | 4.93E-06 | 0.806265                    | Cnih4         | 9.38E-06 | 0.513635                    |
| Mical3    | 5.41E-06 | 0.362032                    | Trp53bp1      | 9.38E-06 | 0.251174                    |
| Tcp11l2   | 5.46E-06 | 0.567039                    | Suco          | 9.45E-06 | 0.378021                    |
| Bptf      | 5.59E-06 | 0.663364                    | 1110001J03Rik | 9.62E-06 | 0.689708                    |
| Arhgef7   | 5.60E-06 | 0.257908                    | Il17re        | 9.63E-06 | 0.413608                    |
| Isg20l2   | 5.71E-06 | 0.277765                    | Lpin2         | 9.97E-06 | 0.28172                     |
| Rbm12     | 5.74E-06 | 0.363703                    | Nr4a1         | 1.00E-05 | 0.751932                    |
| Rnd3      | 5.74E-06 | 0.480577                    | Ahctf1        | 1.01E-05 | 0.477209                    |
| Bsg       | 5.74E-06 | 0.723583                    | Zfr           | 1.01E-05 | 0.495693                    |
| Eif6      | 5.79E-06 | 0.732537                    | Myl12a        | 1.01E-05 | 0.934664                    |
| Bap1      | 5.84E-06 | 0.348477                    | Itga3         | 1.10E-05 | 0.439835                    |
| Arid5b    | 6.05E-06 | 0.924544                    | Vmp1          | 1.13E-05 | 0.889669                    |
| Clk1      | 6.05E-06 | 0.598125                    | Itgb1         | 1.14E-05 | 0.600249                    |
| Med22     | 6.05E-06 | 0.348546                    | Hipk3         | 1.15E-05 | 0.487941                    |
| Cmtm8     | 6.39E-06 | 0.447773                    | Spty2d1       | 1.17E-05 | 0.547292                    |
| Trak1     | 6.49E-06 | 0.385457                    | Cox7c         | 1.17E-05 | 0.857119                    |
| Dpysl3    | 6.57E-06 | 0.354611                    | Rnf11         | 1.18E-05 | 0.61063                     |
| Mark2     | 6.62E-06 | 0.624611                    | Tns3          | 1.18E-05 | 0.645747                    |
| Ifitm3    | 6.62E-06 | 1.055033                    | Sun2          | 1.19E-05 | 0.483977                    |
| Parp8     | 6.70E-06 | 0.33067                     | Sp3           | 1.19E-05 | 0.449045                    |
| Uqcr10    | 6.73E-06 | 0.858073                    | Ubxn6         | 1.21E-05 | 0.608083                    |
| Ptprk     | 7.13E-06 | 0.464545                    | Pkn2          | 1.22E-05 | 0.6063                      |
| Six1      | 7.27E-06 | 0.53082                     | Ptp4a1        | 1.23E-05 | 0.809994                    |
| Hivep3    | 7.28E-06 | 0.55956                     | Ahcyl1        | 1.26E-05 | 0.460731                    |
| Flii      | 7.45E-06 | 0.435623                    | Naa50         | 1.29E-05 | 0.595168                    |
| Smtn      | 7.46E-06 | 0.355738                    | Vps37a        | 1.30E-05 | 0.367245                    |
| Atl2      | 7.76E-06 | 0.420387                    | Serinc1       | 1.31E-05 | 0.685553                    |
| Mccc1     | 7.77E-06 | 0.348556                    | Itm2b         | 1.35E-05 | 0.758965                    |
| Zfp655    | 7.92E-06 | 0.443881                    | Ppp6r3        | 1.36E-05 | 0.335207                    |
| Raph1     | 8.25E-06 | 0.68124                     | Fdx1          | 1.37E-05 | 0.497901                    |
| Maff      | 8.36E-06 | 0.847137                    | BC003965      | 1.40E-05 | 0.460094                    |
| Smad1     | 8.40E-06 | 0.532321                    | Atrx          | 1.41E-05 | 0.527268                    |
| Top1      | 8.41E-06 | 1.056276                    | Anxa11        | 1.41E-05 | 0.497943                    |
| Pias2     | 8.43E-06 | 0.318623                    | Flnb          | 1.43E-05 | 0.482342                    |
| Chchd10   | 8.47E-06 | 1.158182                    | Cbx6          | 1.43E-05 | 0.362554                    |
| Lmna      | 8.70E-06 | 0.95727                     | Kank1         | 1.45E-05 | 0.504977                    |
| Cyp2f2    | 8.81E-06 | 2.150214                    | Rab11fip1     | 1.46E-05 | 0.671094                    |
| Ptpn14    | 8.83E-06 | 0.387715                    | Midn          | 1.47E-05 | 0.786801                    |

| Gene Name | p-value  | log <sub>2</sub> FoldChange | Gene Name | p-value  | log <sub>2</sub> FoldChange |
|-----------|----------|-----------------------------|-----------|----------|-----------------------------|
| Chp1      | 1.50E-05 | 0.637561                    | Sorbs2    | 2.31E-05 | 0.846298                    |
| Ndufa12   | 1.53E-05 | 0.650388                    | Cnot6     | 2.32E-05 | 0.285065                    |
| Enah      | 1.54E-05 | 0.379288                    | Ywhaq     | 2.33E-05 | 0.58936                     |
| Ces1d     | 1.55E-05 | 1.221092                    | Pdcl3     | 2.39E-05 | 0.50425                     |
| Map1lc3b  | 1.56E-05 | 0.605372                    | Tbk1      | 2.45E-05 | 0.316515                    |
| Ptpn23    | 1.59E-05 | 0.318859                    | Rce1      | 2.50E-05 | 0.47237                     |
| Arhgap10  | 1.59E-05 | 0.264896                    | Atf6      | 2.52E-05 | 0.319628                    |
| Jmjd1c    | 1.60E-05 | 0.583297                    | Kif5b     | 2.57E-05 | 0.783289                    |
| Fam102b   | 1.65E-05 | 0.367716                    | Wdr13     | 2.58E-05 | 0.340108                    |
| Wbp5      | 1.66E-05 | 0.787336                    | Son       | 2.59E-05 | 0.826882                    |
| Ehf       | 1.66E-05 | 0.92203                     | Efna1     | 2.60E-05 | 0.704254                    |
| Myef2     | 1.70E-05 | 0.315959                    | Ubc       | 2.61E-05 | 1.120379                    |
| Eif4g2    | 1.70E-05 | 0.950955                    | Dsc2      | 2.63E-05 | 0.491752                    |
| Rap2b     | 1.70E-05 | 0.926735                    | Ripk4     | 2.63E-05 | 0.329025                    |
| Brd2      | 1.73E-05 | 0.604436                    | Itga6     | 2.64E-05 | 0.841254                    |
| Tgfb2     | 1.73E-05 | 0.606205                    | Phf23     | 2.67E-05 | 0.370299                    |
| Sf1       | 1.74E-05 | 0.633002                    | Uqcrq     | 2.68E-05 | 0.635377                    |
| Atp5b     | 1.79E-05 | 0.848346                    | Hk1       | 2.69E-05 | 0.381484                    |
| Nup153    | 1.82E-05 | 0.285103                    | Zfp644    | 2.70E-05 | 0.498359                    |
| Elf1      | 1.84E-05 | 0.594431                    | Sec62     | 2.71E-05 | 0.678231                    |
| Thoc6     | 1.90E-05 | 0.422327                    | Dnmt3a    | 2.75E-05 | 0.28692                     |
| Klf13     | 1.92E-05 | 0.853859                    | Errfi1    | 2.77E-05 | 1.427617                    |
| Ctbp2     | 1.93E-05 | 0.310807                    | Atp5d     | 2.78E-05 | 0.742251                    |
| Ncoa7     | 1.96E-05 | 0.835103                    | Pias4     | 2.79E-05 | 0.280936                    |
| Ralbp1    | 1.96E-05 | 0.701351                    | Plekhm2   | 2.81E-05 | 0.312516                    |
| Tcf12     | 1.99E-05 | 0.414672                    | Ski       | 2.92E-05 | 0.324059                    |
| Ctnnd1    | 2.03E-05 | 0.586183                    | Rbms1     | 2.95E-05 | 0.510458                    |
| Snrnp200  | 2.06E-05 | 0.324034                    | Ncl       | 2.97E-05 | 0.721439                    |
| S100a1    | 2.06E-05 | 0.786632                    | Rab14     | 3.05E-05 | 0.627431                    |
| Nbr1      | 2.08E-05 | 0.326994                    | Ndufa11   | 3.08E-05 | 0.508958                    |
| Socs5     | 2.19E-05 | 0.306018                    | Rock2     | 3.09E-05 | 0.417904                    |
| Atp11a    | 2.19E-05 | 0.66865                     | Cox6a1    | 3.10E-05 | 0.618703                    |
| H2-K1     | 2.20E-05 | 0.793897                    | Zfp326    | 3.13E-05 | 0.35175                     |
| Lgals7    | 2.23E-05 | 0.597079                    | Cdk19     | 3.23E-05 | 0.348045                    |
| Aplp2     | 2.24E-05 | 0.785912                    | Tacc2     | 3.27E-05 | 0.692902                    |
| Stk11     | 2.25E-05 | 0.613262                    | Plscr1    | 3.29E-05 | 0.664937                    |
| S100a16   | 2.26E-05 | 0.490087                    | Ccnd1     | 3.32E-05 | 0.305119                    |
| Zbtb21    | 2.28E-05 | 0.372278                    | Sqstm1    | 3.36E-05 | 1.085635                    |
| Kif1b     | 2.29E-05 | 0.484221                    | Cln8      | 3.37E-05 | 0.281311                    |
| Ndufb2    | 2.29E-05 | 0.685287                    | Herc1     | 3.41E-05 | 0.345945                    |

| Gene Name     | p-value  | log <sub>2</sub> FoldChange | Gene Name     | p-value  | log <sub>2</sub> FoldChange |
|---------------|----------|-----------------------------|---------------|----------|-----------------------------|
| Rfc1          | 3.42E-05 | 0.349208                    | Cltc          | 5.16E-05 | 0.629453                    |
| Atpif1        | 3.49E-05 | 0.934576                    | Csde1         | 5.22E-05 | 0.764709                    |
| Tfap2b        | 3.53E-05 | 0.323958                    | Slc38a2       | 5.23E-05 | 0.723661                    |
| Edn1          | 3.55E-05 | 0.924182                    | Cd164         | 5.24E-05 | 0.621276                    |
| Lpp           | 3.55E-05 | 0.455647                    | Rad23b        | 5.35E-05 | 0.599352                    |
| Gpx1          | 3.57E-05 | 0.708379                    | Hmgn1         | 5.41E-05 | 0.756367                    |
| Egr1          | 3.58E-05 | 1.478354                    | 2010107E04Rik | 5.43E-05 | 0.813282                    |
| Ltbp1         | 3.60E-05 | 0.279493                    | Atp5j         | 5.56E-05 | 0.754452                    |
| Tnrc18        | 3.62E-05 | 0.250275                    | Adgrg1        | 5.65E-05 | 0.408607                    |
| Vps72         | 3.63E-05 | 0.442024                    | Inpp1         | 5.69E-05 | 0.3181                      |
| Tecr          | 3.75E-05 | 0.661764                    | Nr2f2         | 5.79E-05 | 0.423203                    |
| Arhgef5       | 3.81E-05 | 0.317605                    | ldh2          | 5.79E-05 | 0.727584                    |
| Csnk1e        | 3.84E-05 | 0.355299                    | Mkfn1         | 5.80E-05 | 0.580504                    |
| Hspa9         | 3.90E-05 | 0.61413                     | Setd7         | 5.81E-05 | 0.25588                     |
| Tmcc3         | 3.97E-05 | 0.383366                    | Trib1         | 5.85E-05 | 0.692488                    |
| Notch2        | 4.06E-05 | 0.252911                    | Papss1        | 5.89E-05 | 0.509261                    |
| Dlg1          | 4.18E-05 | 0.367789                    | Fam213b       | 6.08E-05 | 0.697225                    |
| Acin1         | 4.24E-05 | 0.399788                    | Glul          | 6.14E-05 | 1.367442                    |
| Dyrk1a        | 4.26E-05 | 0.441057                    | Cebpb         | 6.17E-05 | 0.349017                    |
| Zbtb17        | 4.26E-05 | 0.276432                    | Slc25a3       | 6.19E-05 | 0.608175                    |
| Anxa2         | 4.28E-05 | 0.506478                    | Cat           | 6.21E-05 | 0.726292                    |
| Ywhae         | 4.29E-05 | 0.744946                    | Axin1         | 6.25E-05 | 0.269277                    |
| Stoml2        | 4.33E-05 | 0.552135                    | Ndr2          | 6.32E-05 | 0.260028                    |
| Rest          | 4.42E-05 | 0.359042                    | Nsmce2        | 6.37E-05 | 0.321874                    |
| Qk            | 4.52E-05 | 0.50478                     | Smg5          | 6.43E-05 | 0.311921                    |
| Arhgef2       | 4.53E-05 | 0.350374                    | Srsf10        | 6.44E-05 | 0.421438                    |
| 4930402H24Rik | 4.61E-05 | 0.264769                    | Pdha1         | 6.47E-05 | 0.507962                    |
| lfrd1         | 4.64E-05 | 1.079234                    | Arf2          | 6.51E-05 | 0.39076                     |
| Syncrin       | 4.70E-05 | 0.470264                    | Mex3c         | 6.58E-05 | 0.339996                    |
| Bri3          | 4.73E-05 | 0.560598                    | Zbtb10        | 6.67E-05 | 0.310581                    |
| Eny2          | 4.75E-05 | 0.570555                    | Selk          | 6.68E-05 | 0.624533                    |
| Sppl3         | 4.76E-05 | 0.401794                    | Atox1         | 6.81E-05 | 0.473558                    |
| Eif4b         | 4.84E-05 | 0.46962                     | Hdgf          | 7.13E-05 | 1.036859                    |
| Atf7          | 4.85E-05 | 0.349447                    | Cand1         | 7.14E-05 | 0.352275                    |
| Aig1          | 4.92E-05 | 0.637862                    | Rhoc          | 7.16E-05 | 0.325607                    |
| Lima1         | 4.92E-05 | 0.733028                    | Taok1         | 7.21E-05 | 0.362709                    |
| Serf1         | 5.03E-05 | 0.461599                    | Gatad2b       | 7.25E-05 | 0.605099                    |
| Gigyf1        | 5.13E-05 | 0.25624                     | Klf16         | 7.49E-05 | 0.405454                    |
| Atf4          | 5.14E-05 | 0.768282                    | Ptpn6         | 7.60E-05 | 0.305295                    |
| Tollip        | 5.14E-05 | 0.330627                    | Celf1         | 7.60E-05 | 0.34615                     |

| Gene Name | p-value  | log <sub>2</sub> FoldChange | Gene Name     | p-value  | log <sub>2</sub> FoldChange |
|-----------|----------|-----------------------------|---------------|----------|-----------------------------|
| Aco2      | 7.79E-05 | 0.644863                    | Arl5b         | 1.09E-04 | 0.47839                     |
| Srsf11    | 7.81E-05 | 0.559962                    | Cox6b1        | 1.10E-04 | 0.77611                     |
| Sash1     | 7.81E-05 | 0.414012                    | Ogt           | 1.12E-04 | 0.59511                     |
| Echdc2    | 8.07E-05 | 0.387143                    | ltpr1         | 1.14E-04 | 0.310957                    |
| Arrdc1    | 8.11E-05 | 0.586655                    | Pttg1ip       | 1.14E-04 | 0.87888                     |
| Nfic      | 8.27E-05 | 0.457645                    | Mia           | 1.15E-04 | 0.524642                    |
| Map3k1    | 8.34E-05 | 0.823984                    | Clk4          | 1.17E-04 | 0.514759                    |
| Brip1os   | 8.56E-05 | 0.298006                    | Psen1         | 1.17E-04 | 0.297978                    |
| Max       | 8.64E-05 | 0.654407                    | lp6k2         | 1.19E-04 | 0.286151                    |
| Ctnna1    | 8.68E-05 | 0.581773                    | Sag           | 1.22E-04 | 0.369111                    |
| Klf7      | 8.76E-05 | 0.514266                    | Cystm1        | 1.22E-04 | 0.915931                    |
| Prdx1     | 8.80E-05 | 0.880673                    | Srrt          | 1.26E-04 | 0.416461                    |
| Gpc4      | 8.85E-05 | 0.38484                     | Hes1          | 1.30E-04 | 1.095794                    |
| Foxc1     | 8.85E-05 | 0.718413                    | Npm3          | 1.31E-04 | 0.48671                     |
| Flna      | 8.85E-05 | 0.735721                    | Dst           | 1.32E-04 | 0.526194                    |
| Dhx32     | 8.91E-05 | 0.261677                    | Glg1          | 1.32E-04 | 0.420576                    |
| Rnf103    | 8.92E-05 | 0.28487                     | Hmox1         | 1.33E-04 | 0.325741                    |
| Atp6v1a   | 8.92E-05 | 0.711177                    | Nr1d1         | 1.33E-04 | 0.340213                    |
| Pabpc1    | 8.92E-05 | 0.629825                    | Ank3          | 1.33E-04 | 0.28657                     |
| Eif5b     | 8.98E-05 | 0.487713                    | 2610507B11Rik | 1.34E-04 | 0.466867                    |
| Timm17a   | 8.99E-05 | 0.554596                    | Dcl1          | 1.41E-04 | 0.367695                    |
| Ptges3    | 9.00E-05 | 0.735037                    | 2810403A07Rik | 1.42E-04 | 0.572186                    |
| Cdk9      | 9.17E-05 | 0.319454                    | Bdp1          | 1.43E-04 | 0.442105                    |
| Mat2a     | 9.35E-05 | 0.729458                    | Phlda1        | 1.51E-04 | 1.047314                    |
| Ctps      | 9.44E-05 | 0.321033                    | Zfp148        | 1.51E-04 | 0.28362                     |
| Herc2     | 9.53E-05 | 0.294778                    | Fbxw11        | 1.52E-04 | 0.327003                    |
| Cfap43    | 9.59E-05 | 0.348087                    | Ndufs6        | 1.55E-04 | 0.669349                    |
| Atp13a3   | 9.68E-05 | 0.469636                    | Hspa5         | 1.55E-04 | 0.408466                    |
| Atp8b1    | 9.74E-05 | 0.353077                    | Sestd1        | 1.57E-04 | 0.292895                    |
| Wwtr1     | 9.78E-05 | 0.509706                    | Srpk2         | 1.59E-04 | 0.665514                    |
| Ddx10     | 9.82E-05 | 0.346816                    | Prrc2c        | 1.61E-04 | 0.467775                    |
| Usmg5     | 9.84E-05 | 0.833392                    | Usp7          | 1.62E-04 | 0.457233                    |
| Usp6nl    | 1.03E-04 | 0.2819                      | Tbc1d10a      | 1.63E-04 | 0.435254                    |
| Uba1      | 1.04E-04 | 0.452128                    | Nxn           | 1.65E-04 | 0.350691                    |
| Fmo2      | 1.05E-04 | 0.453483                    | Akirin1       | 1.65E-04 | 0.430746                    |
| Mdm4      | 1.05E-04 | 0.394851                    | Wdr45b        | 1.66E-04 | 0.431418                    |
| Cbx3      | 1.05E-04 | 0.447907                    | Pqlc1         | 1.68E-04 | 0.647251                    |
| Brd7      | 1.06E-04 | 0.380626                    | Ppp3ca        | 1.69E-04 | 0.558872                    |
| Stxbp3    | 1.07E-04 | 0.413127                    | Krtcap3       | 1.71E-04 | 0.418576                    |
| Ctbp1     | 1.09E-04 | 0.506575                    | Prdx2         | 1.72E-04 | 0.625953                    |



| Gene Name     | p-value  | log <sub>2</sub> FoldChange | Gene Name     | p-value  | log <sub>2</sub> FoldChange |
|---------------|----------|-----------------------------|---------------|----------|-----------------------------|
| Akap9         | 1.72E-04 | 0.456749                    | Ylpm1         | 2.58E-04 | 0.350686                    |
| Arhgap18      | 1.76E-04 | 0.258757                    | Arid1a        | 2.58E-04 | 0.318572                    |
| Pdlim5        | 1.76E-04 | 0.474652                    | Atxn2         | 2.64E-04 | 0.300124                    |
| Pvr           | 1.77E-04 | 0.695851                    | Kcnq1ot1      | 2.64E-04 | 0.87346                     |
| Wrnip1        | 1.84E-04 | 0.297441                    | Fgfbp1        | 2.68E-04 | 0.275012                    |
| Hipk1         | 1.87E-04 | 0.534866                    | Snx10         | 2.69E-04 | 0.298808                    |
| Ceacam1       | 1.87E-04 | 0.600591                    | Pum2          | 2.70E-04 | 0.382791                    |
| Trim2         | 1.89E-04 | 0.78513                     | Sdcbp         | 2.70E-04 | 0.514544                    |
| Chmp4b        | 1.91E-04 | 0.702829                    | Chchd5        | 2.71E-04 | 0.459908                    |
| Wdr45         | 1.94E-04 | 0.28775                     | Znrf1         | 2.75E-04 | 0.685307                    |
| Cd63          | 1.94E-04 | 0.809205                    | Pabpn1        | 2.78E-04 | 0.517757                    |
| Kit           | 1.96E-04 | 0.65874                     | Fmr1          | 2.78E-04 | 0.464479                    |
| 4931406P16Rik | 1.98E-04 | 0.271067                    | Rab34         | 2.85E-04 | 0.316536                    |
| Mpzl1         | 1.98E-04 | 0.261393                    | Ndufs4        | 2.86E-04 | 0.567061                    |
| Ndrp1         | 2.02E-04 | 1.146316                    | Dcaf12        | 2.86E-04 | 0.359381                    |
| Mif           | 2.02E-04 | 0.827034                    | Yrdc          | 2.91E-04 | 0.521785                    |
| Hnrnpa2b1     | 2.03E-04 | 0.669108                    | Ndufb11       | 2.92E-04 | 0.519417                    |
| Carhsp1       | 2.04E-04 | 0.382335                    | Rab20         | 2.93E-04 | 0.351041                    |
| Mrto4         | 2.05E-04 | 0.344149                    | Lgals3        | 2.96E-04 | 0.875786                    |
| Cfl2          | 2.05E-04 | 0.521926                    | Mtdh          | 2.98E-04 | 0.465746                    |
| Hspb8         | 2.05E-04 | 0.669049                    | Gtf2i         | 3.06E-04 | 0.330587                    |
| Ddx3x         | 2.11E-04 | 0.768568                    | Clic1         | 3.06E-04 | 0.613709                    |
| Pkp4          | 2.14E-04 | 0.546176                    | Mark3         | 3.07E-04 | 0.297437                    |
| Nip7          | 2.16E-04 | 0.31684                     | Rnf130        | 3.08E-04 | 0.39739                     |
| Tfip11        | 2.16E-04 | 0.294701                    | 4930523C07Rik | 3.10E-04 | 0.655853                    |
| Vamp8         | 2.16E-04 | 0.652702                    | Cast          | 3.15E-04 | 0.336703                    |
| Ube2s         | 2.17E-04 | 0.692827                    | Rbm39         | 3.22E-04 | 0.643808                    |
| Sfr1          | 2.18E-04 | 0.73247                     | Ralgapa2      | 3.39E-04 | 0.330319                    |
| Camk1         | 2.19E-04 | 0.384815                    | Rbm18         | 3.40E-04 | 0.464033                    |
| Nhp2l1        | 2.20E-04 | 0.540589                    | Erdr1         | 3.46E-04 | 0.511964                    |
| Pbrm1         | 2.23E-04 | 0.524853                    | Slc5a8        | 3.48E-04 | 0.371859                    |
| Pak1ip1       | 2.28E-04 | 0.336839                    | Barx2         | 3.50E-04 | 0.574915                    |
| Ankrd11       | 2.33E-04 | 0.573778                    | Eif5          | 3.56E-04 | 0.611508                    |
| Npepps        | 2.34E-04 | 0.392796                    | Ssbp3         | 3.59E-04 | 0.37699                     |
| Kat2b         | 2.38E-04 | 0.40087                     | Tomm20        | 3.61E-04 | 0.684074                    |
| Pxdc1         | 2.50E-04 | 0.315469                    | Tpi1          | 3.62E-04 | 0.632765                    |
| Dag1          | 2.51E-04 | 0.299513                    | Mgrn1         | 3.64E-04 | 0.28172                     |
| Ube2e3        | 2.54E-04 | 0.672849                    | Gm16286       | 3.65E-04 | 0.464397                    |
| Fam92a        | 2.55E-04 | 0.327437                    | Timm10        | 3.69E-04 | 0.348057                    |
| Smad1         | 2.56E-04 | 0.439894                    | Fahd2a        | 3.70E-04 | 0.332336                    |

| Gene Name     | p-value  | log <sub>2</sub> FoldChange | Gene Name | p-value  | log <sub>2</sub> FoldChange |
|---------------|----------|-----------------------------|-----------|----------|-----------------------------|
| Zc3hav1       | 3.74E-04 | 0.330201                    | Ppp1r15a  | 4.76E-04 | 0.56185                     |
| Exoc5         | 3.75E-04 | 0.308406                    | Csad      | 4.82E-04 | 0.351141                    |
| Srsf2         | 3.79E-04 | 0.777376                    | Cbx7      | 4.85E-04 | 0.26049                     |
| Phlda3        | 3.85E-04 | 0.29433                     | Txndc5    | 4.86E-04 | 0.513339                    |
| Stt3a         | 3.86E-04 | 0.463347                    | Uqcrfs1   | 4.88E-04 | 0.578187                    |
| Malat1        | 3.88E-04 | 0.851653                    | Eif4g1    | 4.90E-04 | 0.441054                    |
| Uqcrh         | 3.88E-04 | 0.691627                    | Plscr3    | 4.90E-04 | 0.344535                    |
| Klf9          | 3.92E-04 | 0.409892                    | ltpr2     | 4.96E-04 | 0.389808                    |
| Arhgap42      | 3.93E-04 | 0.268077                    | Dnm1l     | 5.00E-04 | 0.278097                    |
| Hnrnpa3       | 3.93E-04 | 0.684697                    | Rnf10     | 5.07E-04 | 0.648047                    |
| Smim10l1      | 3.93E-04 | 0.443952                    | Stau2     | 5.11E-04 | 0.316577                    |
| Myo1e         | 3.94E-04 | 0.256247                    | Btbd9     | 5.13E-04 | 0.281008                    |
| Snrnp70       | 3.97E-04 | 0.428252                    | Lamp2     | 5.14E-04 | 0.557402                    |
| 2200002D01Rik | 4.01E-04 | 0.301399                    | Slc12a2   | 5.15E-04 | 1.04353                     |
| Usp53         | 4.02E-04 | 0.361945                    | Bag3      | 5.17E-04 | 0.551646                    |
| Ggnbp2        | 4.05E-04 | 0.457027                    | Sin3b     | 5.21E-04 | 0.550137                    |
| Rbp1          | 4.14E-04 | 0.421083                    | Lrch1     | 5.21E-04 | 0.310483                    |
| Wdr1          | 4.19E-04 | 0.597865                    | Lmbr1l    | 5.24E-04 | 0.355783                    |
| Rmnd5b        | 4.19E-04 | 0.341653                    | Cebpz     | 5.25E-04 | 0.400118                    |
| Slc25a21      | 4.20E-04 | 0.395841                    | Pim3      | 5.31E-04 | 0.426358                    |
| Pdia3         | 4.21E-04 | 0.484224                    | Eif4a1    | 5.34E-04 | 0.844008                    |
| Myl6          | 4.23E-04 | 0.593665                    | Pphln1    | 5.37E-04 | 0.309225                    |
| Hspb1         | 4.23E-04 | 1.081961                    | Srsf5     | 5.43E-04 | 0.650349                    |
| Nenf          | 4.23E-04 | 0.439654                    | Atp2b1    | 5.45E-04 | 0.835182                    |
| Hsp90ab1      | 4.30E-04 | 0.574598                    | Taldo1    | 5.49E-04 | 0.636407                    |
| Pnrc1         | 4.30E-04 | 0.583981                    | Ubtf      | 5.52E-04 | 0.347372                    |
| Zfp703        | 4.30E-04 | 1.046325                    | Aamp      | 5.57E-04 | 0.468393                    |
| Adam10        | 4.31E-04 | 0.329773                    | Arglu1    | 5.62E-04 | 0.417699                    |
| Cyth2         | 4.31E-04 | 0.436029                    | Tpp2      | 5.63E-04 | 0.397058                    |
| Ywhaz         | 4.34E-04 | 0.659089                    | Hypk      | 5.66E-04 | 0.465368                    |
| Anxa5         | 4.35E-04 | 0.436096                    | Mga       | 5.71E-04 | 0.37649                     |
| Nfe2l1        | 4.35E-04 | 0.475157                    | Agrn      | 5.77E-04 | 0.300751                    |
| Tmem30b       | 4.37E-04 | 0.388021                    | Klhl9     | 5.77E-04 | 0.265827                    |
| Ctsl          | 4.41E-04 | 1.099993                    | Trp53     | 5.83E-04 | 0.435193                    |
| Dmd           | 4.43E-04 | 0.335674                    | Atp6v1f   | 5.84E-04 | 0.574425                    |
| Ralb          | 4.44E-04 | 0.381251                    | Ezr       | 5.87E-04 | 0.651154                    |
| Ctnnbip1      | 4.48E-04 | 0.313108                    | Arhgap44  | 5.91E-04 | 0.26174                     |
| Zfand3        | 4.56E-04 | 0.316686                    | Stx11     | 5.93E-04 | 0.320746                    |
| Rel1          | 4.59E-04 | 0.55065                     | Ctsb      | 5.97E-04 | 0.425679                    |
| RbmX          | 4.63E-04 | 0.30029                     | Ppp1r15b  | 5.99E-04 | 0.380618                    |

| Gene Name | p-value  | log <sub>2</sub> FoldChange | Gene Name  | p-value  | log <sub>2</sub> FoldChange |
|-----------|----------|-----------------------------|------------|----------|-----------------------------|
| Ift43     | 6.21E-04 | 0.257085                    | Denr       | 8.32E-04 | 0.558958                    |
| Med13l    | 6.21E-04 | 0.391181                    | Elp5       | 8.55E-04 | 0.422579                    |
| Tmbim6    | 6.24E-04 | 0.572221                    | Pard3      | 8.59E-04 | 0.265152                    |
| Arih2     | 6.24E-04 | 0.489697                    | Ptma       | 8.60E-04 | 0.518733                    |
| Inpp4a    | 6.33E-04 | 0.2509                      | Dusp5      | 8.64E-04 | 0.856974                    |
| Mesdc1    | 6.34E-04 | 0.327572                    | Msl1       | 8.66E-04 | 0.340157                    |
| Pafah1b1  | 6.35E-04 | 0.618967                    | Pgam1      | 8.78E-04 | 0.647368                    |
| Trim24    | 6.46E-04 | 0.379441                    | Aldh2      | 8.79E-04 | 0.656496                    |
| Fam60a    | 6.51E-04 | 0.267334                    | Efh2       | 8.80E-04 | 1.11391                     |
| Canx      | 6.58E-04 | 0.582841                    | Eif1a      | 8.81E-04 | 0.834705                    |
| Rnf19a    | 6.62E-04 | 0.307886                    | Eps8       | 8.90E-04 | 0.384071                    |
| Dcun1d1   | 6.73E-04 | 0.49107                     | Ptgfrn     | 8.93E-04 | 0.250376                    |
| Jun       | 6.74E-04 | 0.564378                    | Arf6       | 8.95E-04 | 0.641787                    |
| H2-Q4     | 6.82E-04 | 0.57614                     | Esyt2      | 9.00E-04 | 0.259048                    |
| Ccnl2     | 6.85E-04 | 0.527976                    | Sec11a     | 9.14E-04 | 0.583427                    |
| Etf1      | 6.88E-04 | 0.649614                    | Tgoln1     | 9.30E-04 | 0.529663                    |
| Smg1      | 6.90E-04 | 0.271032                    | Srek1      | 9.36E-04 | 0.265816                    |
| Zfx       | 6.91E-04 | 0.315893                    | Azin1      | 9.41E-04 | 0.441999                    |
| Usp16     | 6.95E-04 | 0.320958                    | Vapa       | 9.44E-04 | 0.575441                    |
| Meis2     | 6.99E-04 | 0.980134                    | Tceb2      | 9.46E-04 | 0.537199                    |
| Fbxl3     | 7.02E-04 | 0.378099                    | Ube2b      | 9.47E-04 | 0.720119                    |
| Orc4      | 7.02E-04 | 0.275891                    | Sowahc     | 9.56E-04 | 0.322364                    |
| Dhx15     | 7.05E-04 | 0.517089                    | Bcas2      | 9.59E-04 | 0.462475                    |
| Kat6a     | 7.07E-04 | 0.26954                     | Katnbl1    | 9.76E-04 | 0.255893                    |
| Cdk6      | 7.25E-04 | 0.355315                    | Wac        | 9.83E-04 | 0.462345                    |
| Kansl3    | 7.37E-04 | 0.409753                    | Ndufa5     | 9.88E-04 | 0.504517                    |
| Actr2     | 7.42E-04 | 0.485841                    | Hnrnpc     | 9.93E-04 | 0.49031                     |
| Bcl3      | 7.48E-04 | 0.338648                    | Ppp1cb     | 9.95E-04 | 0.519906                    |
| Adam17    | 7.49E-04 | 0.275865                    | Zfp91      | 1.02E-03 | 0.359946                    |
| Ssfa2     | 7.59E-04 | 0.316141                    | Mfsd6      | 1.02E-03 | 0.328994                    |
| Cul1      | 7.70E-04 | 0.385067                    | Tmem258    | 1.03E-03 | 0.393292                    |
| Vps26a    | 7.77E-04 | 0.378614                    | Aff4       | 1.03E-03 | 0.488039                    |
| Pls3      | 7.79E-04 | 0.32346                     | Atp5j2     | 1.03E-03 | 0.557672                    |
| Mdk       | 7.91E-04 | 0.426121                    | Ppic       | 1.03E-03 | 0.430331                    |
| Nme1      | 7.95E-04 | 0.471003                    | D15Ert621e | 1.04E-03 | 0.327198                    |
| Rnh1      | 8.04E-04 | 0.600492                    | Slc44a1    | 1.05E-03 | 0.446499                    |
| Dazap1    | 8.15E-04 | 0.438315                    | Nmt2       | 1.06E-03 | 0.33111                     |
| Idh3a     | 8.16E-04 | 0.568829                    | Zc3h7b     | 1.06E-03 | 0.444833                    |
| Anapc13   | 8.29E-04 | 0.529267                    | Nucb1      | 1.07E-03 | 0.348766                    |
| Med13     | 8.32E-04 | 0.301522                    | Drap1      | 1.08E-03 | 0.501582                    |

| Gene Name | p-value  | log <sub>2</sub> FoldChange | Gene Name     | p-value  | log <sub>2</sub> FoldChange |
|-----------|----------|-----------------------------|---------------|----------|-----------------------------|
| Ppfibp1   | 1.09E-03 | 0.382249                    | Eef2          | 1.40E-03 | 0.593402                    |
| Pim1      | 1.10E-03 | 0.588997                    | Klk1          | 1.40E-03 | 3.050862                    |
| Chic2     | 1.10E-03 | 0.615529                    | Fbrs          | 1.40E-03 | 0.255095                    |
| Pkm       | 1.10E-03 | 0.441077                    | Pdcd11        | 1.40E-03 | 0.347559                    |
| Gstm1     | 1.11E-03 | 0.415761                    | 2310036O22Rik | 1.41E-03 | 0.521967                    |
| Acsl5     | 1.11E-03 | 0.315542                    | Ptbp3         | 1.43E-03 | 0.60048                     |
| Zwint     | 1.11E-03 | 0.50984                     | Psma3         | 1.43E-03 | 0.58029                     |
| Htt       | 1.12E-03 | 0.273619                    | Tcf7l2        | 1.43E-03 | 0.3                         |
| Pfdn1     | 1.12E-03 | 0.469378                    | Susd6         | 1.43E-03 | 0.481174                    |
| Cnbp      | 1.12E-03 | 0.521228                    | Akr1a1        | 1.43E-03 | 0.478855                    |
| Btg2      | 1.13E-03 | 1.021571                    | Aamdc         | 1.44E-03 | 0.385452                    |
| Atxn7l3b  | 1.13E-03 | 0.545103                    | Lrp6          | 1.44E-03 | 0.352322                    |
| Hnrnp1l   | 1.15E-03 | 0.467701                    | Josd1         | 1.46E-03 | 0.282275                    |
| Fam132a   | 1.16E-03 | 0.421528                    | Tmem184a      | 1.47E-03 | 0.287408                    |
| Efcab14   | 1.16E-03 | 0.342534                    | Cish          | 1.48E-03 | 0.64205                     |
| Hnrnp1m   | 1.19E-03 | 0.532553                    | Actn1         | 1.48E-03 | 0.535589                    |
| Mrpl23    | 1.20E-03 | 0.449971                    | Ctdsp2        | 1.48E-03 | 0.333653                    |
| Ppp4r2    | 1.22E-03 | 0.495873                    | Ppp2cb        | 1.48E-03 | 0.727982                    |
| Cdk2ap1   | 1.22E-03 | 0.523571                    | Ndel1         | 1.48E-03 | 0.502954                    |
| Ube4b     | 1.22E-03 | 0.308932                    | Actb          | 1.50E-03 | 0.464884                    |
| Arg1      | 1.22E-03 | 0.766444                    | Bcl10         | 1.51E-03 | 0.403008                    |
| Pn1sr     | 1.23E-03 | 0.569039                    | Atp5e         | 1.51E-03 | 0.415552                    |
| Hmgb3     | 1.24E-03 | 0.337458                    | Csrp2         | 1.53E-03 | 0.413546                    |
| Ilf3      | 1.26E-03 | 0.287372                    | Zrsr2         | 1.56E-03 | 0.305259                    |
| Tjp2      | 1.26E-03 | 0.538429                    | Rnps1         | 1.56E-03 | 0.498874                    |
| Nktr      | 1.28E-03 | 0.712837                    | Krt23         | 1.57E-03 | 0.928435                    |
| Cnn3      | 1.28E-03 | 0.51054                     | Strn3         | 1.58E-03 | 0.42721                     |
| Armcx3    | 1.29E-03 | 0.387591                    | Tmem63b       | 1.59E-03 | 0.408035                    |
| Ergic3    | 1.30E-03 | 0.466458                    | Rheb          | 1.60E-03 | 0.600343                    |
| Kdm7a     | 1.31E-03 | 0.391254                    | Ptpn11        | 1.61E-03 | 0.392661                    |
| Igfbp5    | 1.31E-03 | 0.270021                    | Srsf6         | 1.61E-03 | 0.531251                    |
| Prpf40a   | 1.32E-03 | 0.370776                    | Pgm2          | 1.61E-03 | 0.399613                    |
| Cyb5r3    | 1.33E-03 | 0.44383                     | Nr1h2         | 1.62E-03 | 0.522252                    |
| Ahr       | 1.34E-03 | 0.340474                    | Wsb1          | 1.62E-03 | 0.450985                    |
| Polr2m    | 1.34E-03 | 0.482875                    | Atg12         | 1.65E-03 | 0.291238                    |
| Camk2n1   | 1.35E-03 | 0.390075                    | Pfkf          | 1.66E-03 | 0.357568                    |
| Frrs1     | 1.35E-03 | 0.259055                    | Tmem259       | 1.66E-03 | 0.344169                    |
| Capn1     | 1.35E-03 | 0.308696                    | Ube2d3        | 1.67E-03 | 0.549624                    |
| Cy5c      | 1.38E-03 | 0.486202                    | Comt          | 1.68E-03 | 0.467494                    |
| Cited2    | 1.39E-03 | 0.808673                    | Ddx6          | 1.68E-03 | 0.446105                    |

| Gene Name | p-value  | log <sub>2</sub> FoldChange | Gene Name | p-value  | log <sub>2</sub> FoldChange |
|-----------|----------|-----------------------------|-----------|----------|-----------------------------|
| Usp9x     | 1.69E-03 | 0.402407                    | Fam104a   | 2.06E-03 | 0.481803                    |
| Pdgfa     | 1.69E-03 | 0.620589                    | Gnl3      | 2.07E-03 | 0.571302                    |
| Kcmf1     | 1.70E-03 | 0.450315                    | D17Wsu92e | 2.08E-03 | 0.454812                    |
| Prpf6     | 1.70E-03 | 0.282652                    | Myo10     | 2.08E-03 | 0.262524                    |
| Gns       | 1.72E-03 | 0.417657                    | Gabarapl2 | 2.09E-03 | 0.385421                    |
| Selenbp1  | 1.73E-03 | 0.25266                     | Acadm     | 2.09E-03 | 0.465665                    |
| Psme4     | 1.74E-03 | 0.285627                    | Irf6      | 2.10E-03 | 0.660111                    |
| Ndufa7    | 1.78E-03 | 0.421843                    | Rbm25     | 2.10E-03 | 0.446738                    |
| Arhgap21  | 1.78E-03 | 0.347039                    | Cfdp1     | 2.11E-03 | 0.492301                    |
| Srsf4     | 1.78E-03 | 0.287289                    | Stard10   | 2.11E-03 | 0.391764                    |
| Appbp2    | 1.79E-03 | 0.367645                    | lpmk      | 2.11E-03 | 0.367751                    |
| Atp5h     | 1.79E-03 | 0.537963                    | Gadd45b   | 2.15E-03 | 0.251368                    |
| Gnaq      | 1.80E-03 | 0.340534                    | Ndst1     | 2.20E-03 | 0.353042                    |
| Fam102a   | 1.80E-03 | 0.498009                    | Mapkap1   | 2.20E-03 | 0.304094                    |
| Ptpn1     | 1.80E-03 | 0.387244                    | Cdk12     | 2.20E-03 | 0.398578                    |
| Immt      | 1.81E-03 | 0.357814                    | Kmt2a     | 2.20E-03 | 0.344534                    |
| Prrc2a    | 1.82E-03 | 0.408324                    | Nrbf2     | 2.21E-03 | 0.39372                     |
| Rrs1      | 1.83E-03 | 0.272885                    | Laptm4a   | 2.21E-03 | 0.266607                    |
| Dnajc5    | 1.84E-03 | 0.424824                    | Ltbr      | 2.22E-03 | 0.34767                     |
| Smad2     | 1.85E-03 | 0.323497                    | Nrip1     | 2.24E-03 | 0.410513                    |
| Gapdh     | 1.86E-03 | 0.508322                    | Zswim6    | 2.25E-03 | 0.263307                    |
| Erf       | 1.86E-03 | 0.297643                    | Dynll2    | 2.26E-03 | 0.704063                    |
| Fgfr1     | 1.87E-03 | 0.365462                    | Cox7a2    | 2.27E-03 | 0.555579                    |
| Foxj3     | 1.89E-03 | 0.292283                    | Slc39a3   | 2.27E-03 | 0.381662                    |
| Ier3      | 1.90E-03 | 0.820444                    | Igf1r     | 2.28E-03 | 0.423805                    |
| Dcxr      | 1.93E-03 | 0.390222                    | Sf3b1     | 2.28E-03 | 0.439301                    |
| Chchd2    | 1.95E-03 | 0.520841                    | Cab39     | 2.29E-03 | 0.375418                    |
| Epn1      | 1.96E-03 | 0.393365                    | Add1      | 2.29E-03 | 0.351978                    |
| Arf1      | 1.97E-03 | 0.655892                    | Kpnb1     | 2.31E-03 | 0.32423                     |
| Ppp1r12c  | 1.97E-03 | 0.294852                    | Sltm      | 2.32E-03 | 0.252957                    |
| Tspyl1    | 1.97E-03 | 0.348274                    | Iqgap2    | 2.34E-03 | 0.462001                    |
| Rnf7      | 1.99E-03 | 0.530599                    | Sppl2a    | 2.34E-03 | 0.352745                    |
| Arl1      | 2.00E-03 | 0.391306                    | Ap2b1     | 2.38E-03 | 0.321203                    |
| Crebbp    | 2.01E-03 | 0.412854                    | Calu      | 2.39E-03 | 0.385405                    |
| Gnb1      | 2.01E-03 | 0.539548                    | Rp9       | 2.42E-03 | 0.36196                     |
| Epc2      | 2.03E-03 | 0.26903                     | Ccser2    | 2.42E-03 | 0.345712                    |
| Srrm1     | 2.03E-03 | 0.43051                     | Ano6      | 2.43E-03 | 0.379093                    |
| Gpx8      | 2.04E-03 | 0.276453                    | Clcn4     | 2.45E-03 | 0.383912                    |
| H2-Q6     | 2.04E-03 | 0.417495                    | Proser2   | 2.46E-03 | 0.418953                    |
| Sorl1     | 2.06E-03 | 0.579909                    | Wapl      | 2.46E-03 | 0.298388                    |

| Gene Name | p-value  | log <sub>2</sub> FoldChange | Gene Name | p-value  | log <sub>2</sub> FoldChange |
|-----------|----------|-----------------------------|-----------|----------|-----------------------------|
| Ttc14     | 2.47E-03 | 0.392897                    | Ndufa13   | 3.13E-03 | 0.549974                    |
| Luc7l3    | 2.48E-03 | 0.506276                    | Tmem57    | 3.14E-03 | 0.252881                    |
| Trp53inp2 | 2.48E-03 | 0.448622                    | Bzw1      | 3.16E-03 | 0.362869                    |
| Psma2     | 2.50E-03 | 0.378313                    | Fam134a   | 3.16E-03 | 0.37692                     |
| Slc25a51  | 2.50E-03 | 0.473007                    | Ythdf1    | 3.18E-03 | 0.251922                    |
| Aspscr1   | 2.51E-03 | 0.351213                    | Aftph     | 3.20E-03 | 0.362009                    |
| Golga4    | 2.54E-03 | 0.299181                    | Rap1gds1  | 3.27E-03 | 0.332241                    |
| Lsm14b    | 2.54E-03 | 0.323063                    | Ndufa2    | 3.27E-03 | 0.468785                    |
| Mapk1ip1l | 2.55E-03 | 0.385374                    | Mme       | 3.30E-03 | 0.362088                    |
| Gadd45a   | 2.55E-03 | 0.746482                    | Csnk1d    | 3.32E-03 | 0.391339                    |
| Aes       | 2.55E-03 | 0.469677                    | Rplp1     | 3.34E-03 | 0.513418                    |
| Agpat5    | 2.57E-03 | 0.255697                    | Efr3a     | 3.35E-03 | 0.443795                    |
| Rfwd2     | 2.57E-03 | 0.344131                    | Sdccag3   | 3.38E-03 | 0.351309                    |
| Skil      | 2.59E-03 | 0.488684                    | Vrk3      | 3.41E-03 | 0.346071                    |
| Kpna4     | 2.60E-03 | 0.28423                     | Dek       | 3.48E-03 | 0.33579                     |
| Larp1     | 2.61E-03 | 0.409846                    | Tmed5     | 3.49E-03 | 0.390761                    |
| Uqcrb     | 2.62E-03 | 0.591345                    | Klhdc2    | 3.54E-03 | 0.3484                      |
| Ybx3      | 2.62E-03 | 0.453262                    | Sidt2     | 3.58E-03 | 0.255839                    |
| Lsm12     | 2.63E-03 | 0.272392                    | Arl6ip5   | 3.62E-03 | 0.426384                    |
| Vcp       | 2.65E-03 | 0.365808                    | Hmox2     | 3.63E-03 | 0.327522                    |
| Lpgat1    | 2.66E-03 | 0.453111                    | Mkln1     | 3.65E-03 | 0.624924                    |
| Tmem242   | 2.70E-03 | 0.349096                    | Cdk4      | 3.70E-03 | 0.489497                    |
| Shfm1     | 2.70E-03 | 0.484567                    | Lsm14a    | 3.71E-03 | 0.372405                    |
| Fam177a   | 2.72E-03 | 0.529986                    | Rhot2     | 3.71E-03 | 0.283452                    |
| Atp5c1    | 2.72E-03 | 0.32884                     | Chkb      | 3.72E-03 | 0.352619                    |
| Avl9      | 2.76E-03 | 0.363357                    | Fam120a   | 3.76E-03 | 0.442948                    |
| Usp19     | 2.80E-03 | 0.40177                     | Ube2z     | 3.80E-03 | 0.353708                    |
| Chmp2b    | 2.83E-03 | 0.432727                    | Akt1      | 3.82E-03 | 0.348908                    |
| Ndufa1    | 2.84E-03 | 0.386077                    | Atp5f1    | 3.84E-03 | 0.487742                    |
| Yes1      | 2.85E-03 | 0.325672                    | Tnip2     | 3.85E-03 | 0.399007                    |
| Diaph1    | 2.89E-03 | 0.39292                     | Wbp4      | 3.86E-03 | 0.397175                    |
| Usp22     | 2.93E-03 | 0.298585                    | Ppp2r2a   | 3.89E-03 | 0.380478                    |
| Ndufc1    | 2.97E-03 | 0.354422                    | Cdv3      | 3.89E-03 | 0.477307                    |
| Gnas      | 2.99E-03 | 0.372585                    | Zranb1    | 3.91E-03 | 0.457233                    |
| Eif1      | 3.00E-03 | 0.516999                    | Smpdl3b   | 3.97E-03 | 0.30273                     |
| Eif2s2    | 3.02E-03 | 0.55294                     | Ubald1    | 4.01E-03 | 0.533016                    |
| Papola    | 3.05E-03 | 0.539273                    | Luzp1     | 4.01E-03 | 0.511006                    |
| Smad4     | 3.09E-03 | 0.357644                    | Rhoa      | 4.02E-03 | 0.457711                    |
| Srxn1     | 3.09E-03 | 0.266046                    | Sec14l1   | 4.11E-03 | 0.370387                    |
| Fkbp9     | 3.10E-03 | 0.328753                    | Polr1d    | 4.12E-03 | 0.376638                    |

| Gene Name | p-value  | log <sub>2</sub> FoldChange | Gene Name     | p-value  | log <sub>2</sub> FoldChange |
|-----------|----------|-----------------------------|---------------|----------|-----------------------------|
| Tpd52     | 4.16E-03 | 0.390088                    | Hnrnpa0       | 4.82E-03 | 0.39494                     |
| Agtrap    | 4.16E-03 | 0.304523                    | Ankrd40       | 4.84E-03 | 0.264655                    |
| Txndc17   | 4.17E-03 | 0.452238                    | Rhob          | 4.86E-03 | 0.413648                    |
| Abhd14b   | 4.20E-03 | 0.391575                    | Tra2a         | 4.87E-03 | 0.480956                    |
| Rrp1      | 4.26E-03 | 0.423794                    | Zfp664        | 4.88E-03 | 0.314496                    |
| R3hdm4    | 4.27E-03 | 0.308978                    | Urm1          | 4.89E-03 | 0.35877                     |
| Oaz2      | 4.28E-03 | 0.530515                    | Gpi1          | 4.91E-03 | 0.32738                     |
| Fus       | 4.28E-03 | 0.579286                    | Ccnt1         | 4.92E-03 | 0.443469                    |
| Hsp90aa1  | 4.29E-03 | 0.522037                    | Palmd         | 4.92E-03 | 0.638664                    |
| Ccni      | 4.30E-03 | 0.330232                    | Hmgn3         | 4.92E-03 | 0.283349                    |
| Minos1    | 4.32E-03 | 0.498161                    | Cracr2b       | 4.93E-03 | 0.519802                    |
| Dtx3l     | 4.38E-03 | 0.263421                    | Mpp5          | 4.95E-03 | 0.255559                    |
| Csf1      | 4.39E-03 | 0.506239                    | Prkx          | 4.95E-03 | 0.311127                    |
| Tspan7    | 4.39E-03 | 0.304979                    | 2810474O19Rik | 4.99E-03 | 0.504319                    |
| Myo1c     | 4.42E-03 | 0.441622                    | Noc2l         | 5.00E-03 | 0.26332                     |
| Fxyd2     | 4.43E-03 | 1.56182                     | Tra2b         | 5.04E-03 | 0.547808                    |
| Ier5      | 4.44E-03 | 0.506816                    | Ogfr          | 5.07E-03 | 0.428963                    |
| Uap1      | 4.48E-03 | 0.254313                    | Eif3j1        | 5.08E-03 | 0.708943                    |
| Vdac2     | 4.48E-03 | 0.586474                    | Anapc5        | 5.10E-03 | 0.352524                    |
| Ythdc1    | 4.52E-03 | 0.410848                    | Msi2          | 5.12E-03 | 0.343612                    |
| Tmem230   | 4.54E-03 | 0.387273                    | Agfg1         | 5.13E-03 | 0.299038                    |
| Cggbp1    | 4.59E-03 | 0.452931                    | Cnot7         | 5.14E-03 | 0.293214                    |
| Mrpl52    | 4.59E-03 | 0.363483                    | Ankrd17       | 5.14E-03 | 0.350011                    |
| Arf5      | 4.59E-03 | 0.370375                    | Siah2         | 5.14E-03 | 0.355433                    |
| Rab2a     | 4.60E-03 | 0.543287                    | Add3          | 5.17E-03 | 0.286852                    |
| Tor1aip1  | 4.60E-03 | 0.418256                    | Wdr43         | 5.20E-03 | 0.381824                    |
| Dhps      | 4.63E-03 | 0.306723                    | Abt1          | 5.33E-03 | 0.295961                    |
| Ddx47     | 4.64E-03 | 0.373458                    | Rab1a         | 5.36E-03 | 0.477966                    |
| Pdk4      | 4.65E-03 | 0.68307                     | Slc15a2       | 5.36E-03 | 0.335329                    |
| Igf2r     | 4.67E-03 | 0.432652                    | Ddx27         | 5.36E-03 | 0.350903                    |
| Pds5a     | 4.67E-03 | 0.396813                    | Stag1         | 5.37E-03 | 0.284818                    |
| Arpp19    | 4.69E-03 | 0.471703                    | Pcmt1         | 5.37E-03 | 0.392791                    |
| H1f0      | 4.70E-03 | 0.565078                    | Lrp10         | 5.41E-03 | 0.352234                    |
| Ran       | 4.73E-03 | 0.341405                    | Lamtor3       | 5.43E-03 | 0.303537                    |
| S100a13   | 4.74E-03 | 0.344295                    | Slc41a2       | 5.45E-03 | 0.452689                    |
| Srsf7     | 4.76E-03 | 0.367961                    | Fnbp1l        | 5.49E-03 | 0.328825                    |
| Hnrnpa1   | 4.78E-03 | 0.683714                    | Tbl1x         | 5.50E-03 | 0.29906                     |
| Hacd2     | 4.80E-03 | 0.405559                    | Prdx5         | 5.56E-03 | 0.57719                     |
| Ndufb9    | 4.80E-03 | 0.389937                    | Plekhf2       | 5.57E-03 | 0.264824                    |
| Cbx1      | 4.81E-03 | 0.426359                    | Ktn1          | 5.58E-03 | 0.441492                    |

| Gene Name     | p-value  | log <sub>2</sub> FoldChange | Gene Name | p-value  | log <sub>2</sub> FoldChange |
|---------------|----------|-----------------------------|-----------|----------|-----------------------------|
| Ldha          | 5.59E-03 | 0.491706                    | Nufip2    | 6.65E-03 | 0.336347                    |
| Kbtbd2        | 5.63E-03 | 0.279051                    | Pon2      | 6.65E-03 | 0.271736                    |
| Slc25a36      | 5.64E-03 | 0.260949                    | Gar1      | 6.66E-03 | 0.36919                     |
| Atp6ap2       | 5.68E-03 | 0.41905                     | Las1l     | 6.67E-03 | 0.397847                    |
| Btf3          | 5.70E-03 | 0.512524                    | Tm9sf3    | 6.72E-03 | 0.547738                    |
| Ak6           | 5.73E-03 | 0.252367                    | Rassf1    | 6.82E-03 | 0.322952                    |
| Reps1         | 5.83E-03 | 0.298569                    | Rela      | 6.83E-03 | 0.538586                    |
| Rbbp6         | 5.85E-03 | 0.450514                    | Pebp1     | 6.85E-03 | 0.430309                    |
| Sod1          | 5.89E-03 | 0.575674                    | Cox7b     | 6.87E-03 | 0.597452                    |
| Arrdc4        | 5.91E-03 | 0.641431                    | Lsm8      | 6.96E-03 | 0.554647                    |
| Phf10         | 5.91E-03 | 0.31312                     | H2-D1     | 7.01E-03 | 0.281406                    |
| Etfa          | 6.01E-03 | 0.372171                    | lah1      | 7.05E-03 | 0.395459                    |
| Ubr3          | 6.02E-03 | 0.278384                    | Larp1b    | 7.09E-03 | 0.376203                    |
| Qrich1        | 6.05E-03 | 0.339731                    | Shoc2     | 7.13E-03 | 0.313756                    |
| Rab7          | 6.07E-03 | 0.39328                     | Lasp1     | 7.17E-03 | 0.369628                    |
| Csnk2a1       | 6.11E-03 | 0.334185                    | Nipa2     | 7.17E-03 | 0.502917                    |
| Nfia          | 6.15E-03 | 0.406618                    | B2m       | 7.23E-03 | 0.331342                    |
| Glyr1         | 6.17E-03 | 0.425022                    | Parva     | 7.25E-03 | 0.306911                    |
| Colgalt1      | 6.17E-03 | 0.36825                     | Sod2      | 7.27E-03 | 0.454228                    |
| Tmem120a      | 6.20E-03 | 0.335152                    | Mllt10    | 7.33E-03 | 0.339547                    |
| Fbl           | 6.21E-03 | 0.262941                    | Hsd17b12  | 7.35E-03 | 0.429087                    |
| Scand1        | 6.23E-03 | 0.303135                    | Pbxip1    | 7.44E-03 | 0.351814                    |
| 1810011010Rik | 6.26E-03 | 0.70368                     | Atp2c1    | 7.45E-03 | 0.406002                    |
| Pde4d         | 6.28E-03 | 0.365705                    | Serinc3   | 7.52E-03 | 0.420836                    |
| Swi5          | 6.30E-03 | 0.454231                    | Eif1b     | 7.52E-03 | 0.330263                    |
| Psm10         | 6.35E-03 | 0.324375                    | Cyc1      | 7.55E-03 | 0.634069                    |
| Helz          | 6.36E-03 | 0.297307                    | Luc7l2    | 7.58E-03 | 0.523346                    |
| Klf3          | 6.37E-03 | 0.31122                     | Ndufc2    | 7.65E-03 | 0.389594                    |
| Atp5o         | 6.42E-03 | 0.545078                    | Tmem131   | 7.79E-03 | 0.3181                      |
| Cct5          | 6.45E-03 | 0.342536                    | Eef1a1    | 7.80E-03 | 0.492795                    |
| Calr          | 6.48E-03 | 0.338253                    | Rragd     | 7.84E-03 | 0.369584                    |
| Btg3          | 6.51E-03 | 0.30356                     | Pak2      | 7.86E-03 | 0.432981                    |
| Mllt4         | 6.54E-03 | 0.383412                    | Sphk1     | 7.90E-03 | 0.427696                    |
| Gng5          | 6.54E-03 | 0.541803                    | Fiz1      | 7.93E-03 | 0.344385                    |
| Adipor1       | 6.55E-03 | 0.286609                    | Senp6     | 7.98E-03 | 0.287517                    |
| Tmcc1         | 6.55E-03 | 0.370211                    | Dync1li2  | 7.99E-03 | 0.25415                     |
| Pex6          | 6.55E-03 | 0.260328                    | Slc35e4   | 8.01E-03 | 0.266991                    |
| Zmiz1         | 6.57E-03 | 0.323833                    | Cd81      | 8.04E-03 | 0.292853                    |
| Strap         | 6.58E-03 | 0.414294                    | Ide       | 8.07E-03 | 0.36671                     |
| Arpc1b        | 6.60E-03 | 0.401643                    | Dld       | 8.07E-03 | 0.28213                     |



| Gene Name     | p-value  | log <sub>2</sub> FoldChange | Gene Name | p-value  | log <sub>2</sub> FoldChange |
|---------------|----------|-----------------------------|-----------|----------|-----------------------------|
| Fos           | 8.11E-03 | 1.399075                    | Cct2      | 9.12E-03 | 0.310185                    |
| Rbm27         | 8.14E-03 | 0.408656                    | Acadsb    | 9.21E-03 | 0.409237                    |
| Psmb4         | 8.16E-03 | 0.378835                    | Hnrnpk    | 9.35E-03 | 0.395301                    |
| Pdcd6         | 8.24E-03 | 0.304929                    | Anxa6     | 9.46E-03 | 0.521036                    |
| St5           | 8.27E-03 | 0.300122                    | Ilf2      | 9.48E-03 | 0.460524                    |
| Baz1a         | 8.29E-03 | 0.430283                    | Gstt1     | 9.50E-03 | 0.552334                    |
| 0610011F06Rik | 8.33E-03 | 0.368061                    | Tomm40    | 9.56E-03 | 0.305028                    |
| Dync1h1       | 8.35E-03 | 0.310095                    | Rbm7      | 9.63E-03 | 0.256863                    |
| Senp2         | 8.38E-03 | 0.298104                    | Ibtk      | 9.70E-03 | 0.28396                     |
| Ppig          | 8.39E-03 | 0.504802                    | P2rx4     | 9.76E-03 | 0.301304                    |
| Pin1          | 8.40E-03 | 0.260724                    | Gm12840   | 9.87E-03 | 0.634677                    |
| Pdlim3        | 8.44E-03 | 0.279159                    | Rbm6      | 9.93E-03 | 0.404372                    |
| Psma5         | 8.45E-03 | 0.375611                    | Nop10     | 9.94E-03 | 0.308945                    |
| Fryl          | 8.48E-03 | 0.309712                    | Eif4h     | 9.99E-03 | 0.36087                     |
| Nrbp2         | 8.48E-03 | 0.350415                    |           |          |                             |
| Cox14         | 8.52E-03 | 0.272905                    |           |          |                             |
| H3f3b         | 8.53E-03 | 0.35299                     |           |          |                             |
| Ythdf3        | 8.55E-03 | 0.292256                    |           |          |                             |
| Litaf         | 8.56E-03 | 0.472473                    |           |          |                             |
| Rbm8a         | 8.56E-03 | 0.404128                    |           |          |                             |
| Ssr1          | 8.57E-03 | 0.529355                    |           |          |                             |
| Ppp1r2        | 8.59E-03 | 0.349391                    |           |          |                             |
| Prpf38b       | 8.62E-03 | 0.377858                    |           |          |                             |
| Gnai3         | 8.63E-03 | 0.343625                    |           |          |                             |
| Pea15a        | 8.63E-03 | 0.284119                    |           |          |                             |
| Gtf2h5        | 8.64E-03 | 0.351526                    |           |          |                             |
| Ddx42         | 8.65E-03 | 0.301017                    |           |          |                             |
| Lsm2          | 8.71E-03 | 0.313379                    |           |          |                             |
| Arih1         | 8.72E-03 | 0.380405                    |           |          |                             |
| Wdr77         | 8.77E-03 | 0.360506                    |           |          |                             |
| Mpp6          | 8.78E-03 | 0.313941                    |           |          |                             |
| Cuedc2        | 8.82E-03 | 0.25534                     |           |          |                             |
| Thrap3        | 8.95E-03 | 0.293809                    |           |          |                             |
| Sars          | 8.98E-03 | 0.289547                    |           |          |                             |
| Aff1          | 9.03E-03 | 0.292519                    |           |          |                             |
| Pdpf          | 9.03E-03 | 0.518992                    |           |          |                             |
| Irf2bp2       | 9.08E-03 | 0.673252                    |           |          |                             |
| Pla2g7        | 9.10E-03 | 0.596569                    |           |          |                             |
| Cbfb          | 9.11E-03 | 0.312324                    |           |          |                             |

### Cluster 8

| Gene Name | p-value  | log <sub>2</sub> FoldChange | Gene Name     | p-value  | log <sub>2</sub> FoldChange |
|-----------|----------|-----------------------------|---------------|----------|-----------------------------|
| Pcp4      | 1.11E-76 | 2.419596                    | Fblim1        | 2.16E-33 | 0.731628                    |
| Cnn1      | 7.20E-72 | 2.53539                     | Palld         | 2.57E-33 | 1.35699                     |
| Dlk2      | 2.04E-67 | 1.329729                    | Ctgf          | 2.66E-33 | 1.599973                    |
| Serpinb5  | 4.87E-67 | 1.658876                    | Trnp1         | 8.79E-33 | 0.546913                    |
| Trim29    | 6.45E-62 | 1.170752                    | Ntrk3         | 1.12E-32 | 1.044929                    |
| Cck       | 3.44E-60 | 3.198625                    | Ptprz1        | 3.76E-31 | 0.648171                    |
| Chil1     | 3.66E-59 | 1.865292                    | Jph2          | 3.76E-31 | 0.451862                    |
| Fhod3     | 3.32E-57 | 1.021281                    | Osr1          | 4.32E-31 | 0.879489                    |
| Col17a1   | 1.58E-50 | 1.06004                     | Gas1          | 6.29E-31 | 1.755054                    |
| Krt5      | 2.41E-50 | 1.881205                    | Tpm2          | 1.99E-30 | 3.425224                    |
| Nrg2      | 1.64E-49 | 0.750994                    | Krt14         | 2.64E-30 | 3.908732                    |
| Ngf       | 1.70E-46 | 2.397276                    | Nav2          | 2.67E-30 | 0.843467                    |
| Ism1      | 2.53E-46 | 1.004076                    | Plekhb1       | 3.91E-30 | 1.434557                    |
| Pgf       | 5.80E-46 | 0.841448                    | Angptl4       | 4.24E-30 | 1.360101                    |
| Csn3      | 7.08E-46 | 3.442587                    | Sema5a        | 1.08E-29 | 0.737856                    |
| Trp63     | 2.71E-45 | 0.742996                    | Tfap2c        | 1.11E-29 | 0.530275                    |
| Krt17     | 1.36E-44 | 3.828841                    | Mia           | 1.62E-29 | 2.364544                    |
| Igfbp2    | 2.26E-43 | 3.471302                    | Schip1.1      | 1.97E-29 | 0.641992                    |
| Lmod1     | 3.95E-43 | 0.86562                     | Krt7          | 7.62E-29 | 1.995123                    |
| Myh11     | 6.10E-42 | 1.714382                    | Sfrp1         | 8.62E-29 | 1.063026                    |
| Moxd1     | 3.57E-40 | 0.958238                    | Pvrl1         | 1.15E-28 | 1.355914                    |
| Cdh3      | 7.10E-40 | 0.956181                    | Tmem132a      | 3.29E-28 | 0.75112                     |
| Myl9      | 5.76E-39 | 2.430106                    | Pmp22         | 3.47E-28 | 1.60401                     |
| Col4a5    | 2.24E-38 | 0.583308                    | Sparcl1       | 4.55E-28 | 2.03987                     |
| Gjb3      | 3.00E-38 | 0.768396                    | Rbp1          | 9.37E-28 | 1.801803                    |
| Nkd1      | 3.47E-38 | 0.67303                     | Nbl1          | 1.66E-27 | 1.010551                    |
| Acta2     | 3.68E-38 | 4.009187                    | Gpc6          | 2.03E-27 | 0.664091                    |
| Lcn2      | 4.57E-38 | 2.447258                    | Mylk          | 4.01E-27 | 2.075349                    |
| Ii17b     | 2.35E-37 | 1.112376                    | Tspan2        | 4.51E-27 | 0.660058                    |
| Smtn      | 5.58E-37 | 1.3808                      | Pgm5          | 4.97E-27 | 0.656233                    |
| Tagln     | 7.30E-37 | 3.327706                    | Igfbp5        | 5.55E-27 | 3.595922                    |
| Mdfi      | 1.99E-35 | 0.960797                    | Zfp185        | 7.18E-27 | 0.513248                    |
| Slco2a1   | 3.03E-35 | 1.234799                    | Gjb4          | 8.10E-27 | 0.721303                    |
| Kitl      | 1.44E-34 | 1.326054                    | 1700023F06Rik | 8.10E-27 | 0.432432                    |
| Lgals7    | 3.78E-34 | 3.487098                    | Ngfr          | 1.01E-26 | 0.51052                     |
| Sult5a1   | 5.28E-34 | 1.153417                    | Enpp1         | 4.64E-26 | 0.672765                    |
| Ackr3     | 6.69E-34 | 1.678136                    | Dll1          | 6.98E-26 | 0.622365                    |
| Egfl6     | 1.35E-33 | 0.571698                    | Matn2         | 8.38E-26 | 0.658159                    |
| Sostdc1   | 1.53E-33 | 0.72504                     | Cpe           | 1.43E-25 | 1.405358                    |

| Gene Name | p-value  | log <sub>2</sub> FoldChange | Gene Name     | p-value  | log <sub>2</sub> FoldChange |
|-----------|----------|-----------------------------|---------------|----------|-----------------------------|
| Cav1      | 1.73E-25 | 1.060129                    | Gas6          | 5.49E-19 | 2.372084                    |
| Nebl      | 2.06E-25 | 1.067452                    | Dsp           | 7.48E-19 | 1.211565                    |
| Steap4    | 2.36E-25 | 1.992913                    | Npr1          | 1.08E-18 | 0.507417                    |
| Fosl1     | 4.04E-25 | 1.184947                    | Ptprd         | 1.23E-18 | 0.457883                    |
| Rbms3     | 9.92E-25 | 1.183009                    | Sfn           | 1.37E-18 | 2.214231                    |
| Micall1   | 1.17E-24 | 0.686949                    | Col12a1       | 1.43E-18 | 0.450344                    |
| Nrg1      | 1.31E-24 | 1.09668                     | Synpo         | 1.51E-18 | 0.621286                    |
| Ptprs     | 1.81E-24 | 0.895107                    | Gja1          | 3.97E-18 | 1.185879                    |
| Emid1     | 2.10E-24 | 0.903393                    | Tm4sf1        | 5.52E-18 | 2.117158                    |
| Pak6      | 2.88E-24 | 0.325962                    | Shroom3       | 7.89E-18 | 0.674725                    |
| Padi1     | 3.30E-24 | 0.379709                    | Tead1         | 1.04E-17 | 0.76789                     |
| Fmod      | 3.38E-24 | 0.835683                    | Sdc1          | 1.13E-17 | 0.766782                    |
| Tns1      | 5.94E-24 | 1.752426                    | Rgs6          | 1.90E-17 | 0.407408                    |
| Sdk2      | 1.61E-23 | 0.545942                    | Shisa4        | 1.93E-17 | 0.838717                    |
| Tinagl1   | 1.63E-23 | 2.105144                    | Hspg2         | 2.49E-17 | 0.583721                    |
| Snai2     | 1.99E-23 | 0.371612                    | Hgf           | 2.53E-17 | 0.313853                    |
| Lamc2     | 2.39E-23 | 0.89059                     | Rai2          | 2.53E-17 | 0.271359                    |
| Hr        | 3.04E-23 | 0.430846                    | Nfatc2        | 2.61E-17 | 1.14685                     |
| Pdgfc     | 5.52E-23 | 0.618573                    | Krt19         | 2.85E-17 | 0.627224                    |
| Sphk1     | 6.72E-23 | 1.307945                    | Car13         | 3.21E-17 | 0.963758                    |
| Pdlim4    | 7.70E-23 | 1.778228                    | Fmn12         | 3.39E-17 | 0.556094                    |
| Plscr2    | 1.24E-22 | 0.815334                    | Cx3cl1        | 3.59E-17 | 1.38261                     |
| Nrtn      | 1.87E-22 | 1.669184                    | Tmem51        | 3.73E-17 | 1.091147                    |
| Tnnt1     | 2.81E-22 | 0.734885                    | Fgf7          | 5.54E-17 | 0.878651                    |
| Zc2hc1a   | 5.18E-22 | 0.848252                    | Creb5         | 7.31E-17 | 1.194775                    |
| Ank       | 1.72E-21 | 1.147815                    | Tmem53        | 7.67E-17 | 0.341107                    |
| Lhfp      | 1.97E-21 | 1.236405                    | Ptpn14        | 1.22E-16 | 0.565108                    |
| Lamb3     | 6.37E-21 | 1.448256                    | Adgrl2        | 1.55E-16 | 0.821069                    |
| Pltp      | 9.28E-21 | 1.191237                    | Epha2         | 1.59E-16 | 0.718211                    |
| Capn6     | 1.39E-20 | 0.356116                    | Pxdc1         | 2.98E-16 | 1.272871                    |
| Phlda3    | 1.46E-20 | 0.929289                    | Il17rc        | 3.41E-16 | 0.539909                    |
| Rbpms     | 1.93E-20 | 1.495082                    | Tgfbr3        | 4.54E-16 | 0.990672                    |
| Htra1     | 2.36E-20 | 1.296531                    | Prss23        | 5.14E-16 | 1.315707                    |
| Krt15     | 2.72E-20 | 1.180108                    | Arc           | 1.05E-15 | 0.864483                    |
| Vtcn1     | 3.40E-20 | 0.348467                    | Gm1673        | 1.12E-15 | 0.533943                    |
| Fermt1    | 3.80E-20 | 0.352731                    | Tnfrsf12a     | 1.47E-15 | 2.134984                    |
| Axl       | 5.77E-20 | 1.28965                     | Plcb4         | 1.70E-15 | 1.554512                    |
| Jag2      | 5.95E-20 | 0.274832                    | Ptges         | 2.04E-15 | 0.431126                    |
| Tgm2      | 1.22E-19 | 1.031967                    | 5730559C18Rik | 2.20E-15 | 0.543984                    |
| Ndrp2     | 1.50E-19 | 0.704607                    | Rnase4        | 2.62E-15 | 1.089665                    |

| Gene Name | p-value  | log <sub>2</sub> FoldChange | Gene Name | p-value  | log <sub>2</sub> FoldChange |
|-----------|----------|-----------------------------|-----------|----------|-----------------------------|
| Amotl1    | 3.08E-15 | 1.415634                    | Cd200     | 3.86E-13 | 1.012976                    |
| Bgn       | 3.29E-15 | 1.013311                    | Kremen1   | 4.15E-13 | 0.630381                    |
| Eva1c     | 3.64E-15 | 0.310538                    | Tshz2     | 4.46E-13 | 1.008996                    |
| Plxnb1    | 3.95E-15 | 0.316007                    | Hspb1     | 4.82E-13 | 2.375571                    |
| Mgll      | 4.15E-15 | 1.284288                    | Tsc22d1   | 5.31E-13 | 2.78032                     |
| Flna      | 4.20E-15 | 1.659256                    | lft43     | 6.52E-13 | 0.860271                    |
| Eogt      | 7.84E-15 | 0.556875                    | lgsf3     | 6.57E-13 | 0.967784                    |
| Pdgfb     | 8.01E-15 | 0.807764                    | Dusp7     | 7.49E-13 | 0.666608                    |
| Tnik      | 8.95E-15 | 0.568617                    | Plec      | 7.97E-13 | 0.681238                    |
| Cdcp1     | 9.67E-15 | 0.955732                    | Afap1     | 9.58E-13 | 0.551752                    |
| Pdgfa     | 1.22E-14 | 1.350549                    | Ctps      | 1.01E-12 | 0.964801                    |
| Col16a1   | 1.41E-14 | 0.519053                    | Sgk1      | 1.37E-12 | 1.71673                     |
| Ctnnal1   | 1.71E-14 | 0.423847                    | Adamts1   | 1.46E-12 | 1.747834                    |
| Sparc     | 2.81E-14 | 1.664735                    | Rnf24     | 1.77E-12 | 0.403561                    |
| Fbn1      | 3.56E-14 | 0.387461                    | lft81     | 1.92E-12 | 0.594336                    |
| Arhgef12  | 3.86E-14 | 0.609987                    | Slc7a2    | 2.27E-12 | 0.286965                    |
| Plscr1    | 3.87E-14 | 1.459997                    | Dcn       | 2.48E-12 | 0.657963                    |
| Itga6     | 4.15E-14 | 1.137367                    | Ltbp4     | 2.86E-12 | 0.881781                    |
| Dab2      | 6.13E-14 | 0.793513                    | Dmd       | 4.02E-12 | 0.623778                    |
| Svil      | 6.92E-14 | 0.486762                    | Gsto1     | 4.39E-12 | 1.119927                    |
| Arid5b    | 7.22E-14 | 1.811142                    | Adgrg1    | 5.13E-12 | 0.860376                    |
| Mfge8     | 7.57E-14 | 0.756733                    | Vav3      | 5.65E-12 | 0.483174                    |
| Cdc42ep3  | 8.05E-14 | 1.117841                    | Rock2     | 5.86E-12 | 0.704945                    |
| Cp        | 8.18E-14 | 1.123627                    | Fgfr1     | 6.40E-12 | 0.960852                    |
| L3hypdh   | 8.93E-14 | 0.468461                    | Pard3     | 6.62E-12 | 0.632304                    |
| Cav2      | 9.14E-14 | 0.711314                    | Tubb6     | 6.74E-12 | 0.905138                    |
| Fam102b   | 1.02E-13 | 0.833056                    | Atp13a3   | 8.25E-12 | 0.978501                    |
| Iffo2     | 1.14E-13 | 0.650529                    | Pdpn      | 8.49E-12 | 0.99275                     |
| Gnai1     | 1.16E-13 | 0.382113                    | Itga3     | 1.06E-11 | 0.852686                    |
| Trip6     | 1.22E-13 | 0.622838                    | Pdlim7    | 1.58E-11 | 1.002863                    |
| Tpm1      | 1.44E-13 | 2.392826                    | Dag1      | 1.63E-11 | 0.719705                    |
| Tanc1     | 1.49E-13 | 0.778984                    | Ehd2      | 1.65E-11 | 0.51905                     |
| App       | 1.66E-13 | 1.774495                    | Itgb4     | 1.93E-11 | 0.589369                    |
| Sobp      | 2.02E-13 | 0.383912                    | Skiv2l2   | 1.94E-11 | 0.464847                    |
| Zfp503    | 2.11E-13 | 0.438173                    | Lpgat1    | 2.01E-11 | 0.735446                    |
| Serpinh1  | 2.12E-13 | 1.346407                    | Aplp2     | 2.14E-11 | 1.164927                    |
| Ang       | 2.38E-13 | 0.482853                    | Socs5     | 2.14E-11 | 0.393872                    |
| Lpp       | 3.41E-13 | 0.920949                    | Thbs1     | 2.27E-11 | 2.273806                    |
| Fbln2     | 3.55E-13 | 0.629112                    | Ralgds    | 2.41E-11 | 1.484116                    |
| Tgfb3     | 3.74E-13 | 0.567517                    | Shtn1     | 2.50E-11 | 0.475129                    |

| Gene Name     | p-value  | log <sub>2</sub> FoldChange | Gene Name | p-value  | log <sub>2</sub> FoldChange |
|---------------|----------|-----------------------------|-----------|----------|-----------------------------|
| Selm          | 3.13E-11 | 1.02301                     | Klf5      | 3.31E-10 | 0.856459                    |
| Pls3          | 3.23E-11 | 0.556153                    | Stox2     | 3.46E-10 | 0.594444                    |
| Adk           | 3.33E-11 | 0.831159                    | Cryab     | 3.67E-10 | 1.028931                    |
| D3Ertd254e    | 3.64E-11 | 0.359132                    | Csrp1     | 3.83E-10 | 2.270065                    |
| Vcl           | 4.04E-11 | 0.606171                    | Cd59a     | 4.13E-10 | 0.509169                    |
| Rab20         | 4.18E-11 | 1.064332                    | Myc       | 4.28E-10 | 0.74926                     |
| Serpine1      | 4.25E-11 | 1.146166                    | Hacd1     | 4.31E-10 | 0.519091                    |
| Dusp6         | 4.59E-11 | 1.672842                    | Dmpk      | 4.34E-10 | 0.35494                     |
| Nedd4         | 4.61E-11 | 1.370637                    | Itgav     | 4.36E-10 | 0.861419                    |
| Adgrl1        | 4.64E-11 | 0.318018                    | Plpp3     | 4.36E-10 | 0.844402                    |
| Ctnn          | 4.75E-11 | 0.572828                    | Sntb2     | 4.43E-10 | 0.783732                    |
| Mgst1         | 5.10E-11 | 1.251465                    | Sdc4      | 4.56E-10 | 2.268467                    |
| 1190002N15Rik | 5.74E-11 | 0.366732                    | Casp4     | 5.02E-10 | 1.139698                    |
| Golim4        | 5.77E-11 | 0.573708                    | Osgin1    | 5.10E-10 | 0.480807                    |
| Nxn           | 5.86E-11 | 0.738021                    | Lamb1     | 5.34E-10 | 0.387129                    |
| Shb           | 6.68E-11 | 0.461901                    | Kif13a    | 6.12E-10 | 0.342884                    |
| Midn          | 6.97E-11 | 0.83871                     | Zbtb21    | 6.19E-10 | 0.565509                    |
| Pde4b         | 8.76E-11 | 1.751895                    | Ckb       | 6.92E-10 | 1.16134                     |
| Anxa2         | 8.89E-11 | 1.720837                    | Antxr1    | 7.22E-10 | 0.442168                    |
| Rasa3         | 9.13E-11 | 0.643042                    | Col4a1    | 7.70E-10 | 1.119701                    |
| S100a6        | 9.32E-11 | 2.208581                    | Tln1      | 8.19E-10 | 0.849009                    |
| Sik1          | 9.50E-11 | 0.588732                    | Osmr      | 8.51E-10 | 0.70557                     |
| Cald1         | 9.75E-11 | 1.648078                    | Klf9      | 9.22E-10 | 0.978088                    |
| Dsc3          | 1.01E-10 | 0.362835                    | Mocs2     | 9.96E-10 | 0.663549                    |
| Meis2         | 1.02E-10 | 1.235799                    | Dst       | 9.97E-10 | 0.795155                    |
| Ctbp2         | 1.09E-10 | 0.635957                    | Fhl2      | 1.03E-09 | 0.454907                    |
| Bcam          | 1.30E-10 | 0.662574                    | Cep170b   | 1.09E-09 | 0.418592                    |
| Noct          | 1.34E-10 | 0.734261                    | Smarca4   | 1.12E-09 | 0.654014                    |
| Twf1          | 1.71E-10 | 0.682028                    | Klf4      | 1.15E-09 | 1.304283                    |
| Nbeal1        | 1.72E-10 | 0.596603                    | Arl13b    | 1.19E-09 | 0.596248                    |
| Rhoc          | 1.76E-10 | 1.249985                    | Fxyd3     | 1.25E-09 | 1.707011                    |
| Ctnna1        | 1.95E-10 | 0.936031                    | Clstn1    | 1.25E-09 | 0.92784                     |
| Efemp2        | 1.98E-10 | 0.710066                    | Pawr      | 1.28E-09 | 0.341569                    |
| Epas1         | 2.29E-10 | 0.799572                    | Ppp1r12a  | 1.30E-09 | 0.981902                    |
| Prelp         | 2.35E-10 | 0.687792                    | Cltb      | 1.33E-09 | 0.987467                    |
| Fam214b       | 2.43E-10 | 0.351316                    | Gprasp1   | 1.79E-09 | 0.50905                     |
| Nes           | 2.50E-10 | 0.711361                    | Perp      | 1.82E-09 | 1.878169                    |
| Tfap2b        | 2.72E-10 | 0.583763                    | Vwa1      | 1.83E-09 | 0.739027                    |
| Cd151         | 2.78E-10 | 1.116548                    | Tmem158   | 1.96E-09 | 0.420899                    |
| Actn4         | 2.84E-10 | 1.030129                    | Dbi       | 2.00E-09 | 2.313388                    |

| Gene Name     | p-value  | log <sub>2</sub> FoldChange | Gene Name | p-value  | log <sub>2</sub> FoldChange |
|---------------|----------|-----------------------------|-----------|----------|-----------------------------|
| Cnn3          | 2.01E-09 | 1.067715                    | Ccdc137   | 7.61E-09 | 0.321329                    |
| Plce1         | 2.13E-09 | 0.345838                    | Nacc2     | 7.67E-09 | 0.457284                    |
| Ptrf          | 2.38E-09 | 0.755914                    | Mt1       | 9.16E-09 | 2.760521                    |
| Dstn          | 2.40E-09 | 2.282603                    | Map4k3    | 9.23E-09 | 0.516707                    |
| Cyr61         | 2.42E-09 | 1.363994                    | Kctd10    | 9.68E-09 | 0.553935                    |
| Fermt2        | 2.85E-09 | 0.867341                    | Nenf      | 1.04E-08 | 1.153535                    |
| Ndufa11       | 2.93E-09 | 1.299824                    | Tmem47    | 1.11E-08 | 0.308326                    |
| Hs3st1        | 2.97E-09 | 0.564452                    | Rab11fip5 | 1.22E-08 | 0.259573                    |
| S100a10       | 3.04E-09 | 2.060123                    | Ptprg     | 1.28E-08 | 0.30268                     |
| Epcam         | 3.13E-09 | 1.504257                    | Atf3      | 1.44E-08 | 1.940713                    |
| Runx1         | 3.18E-09 | 0.952406                    | S100a16   | 1.46E-08 | 1.134134                    |
| Vcam1         | 3.37E-09 | 1.548253                    | Dusp5     | 1.46E-08 | 1.171208                    |
| Rhou          | 3.43E-09 | 0.816748                    | Mdk       | 1.62E-08 | 0.573947                    |
| Timp2         | 3.43E-09 | 0.981459                    | Tpm4      | 1.74E-08 | 1.03741                     |
| Cep164        | 3.48E-09 | 0.398792                    | Urah      | 1.80E-08 | 1.024837                    |
| Frmd4a        | 3.55E-09 | 0.46882                     | Capns1    | 1.85E-08 | 1.303399                    |
| Atp2a2        | 3.60E-09 | 1.294022                    | Egr1      | 1.86E-08 | 1.197023                    |
| Stx7          | 3.65E-09 | 0.801811                    | Ripk1     | 1.95E-08 | 0.698868                    |
| Srpk2         | 3.65E-09 | 0.774044                    | Atp1a1    | 1.97E-08 | 1.265209                    |
| Apoe          | 3.69E-09 | 2.12622                     | Id4       | 2.10E-08 | 0.423493                    |
| Cdh1          | 3.81E-09 | 0.757622                    | Asph      | 2.10E-08 | 0.771299                    |
| Atp6v1a       | 3.89E-09 | 0.869373                    | Zak       | 2.16E-08 | 0.434547                    |
| Tnks2         | 3.95E-09 | 0.675048                    | Clip2     | 2.20E-08 | 0.338159                    |
| 1810013L24Rik | 4.01E-09 | 0.480917                    | Lgalsl    | 2.30E-08 | 0.399087                    |
| Ifitm3        | 4.30E-09 | 1.663769                    | Cxadr     | 2.40E-08 | 0.814277                    |
| Gnaq          | 4.38E-09 | 0.700161                    | Dync1li2  | 2.40E-08 | 0.444141                    |
| Gsk3b         | 4.39E-09 | 0.684172                    | Icam1     | 2.44E-08 | 0.82873                     |
| Rpia          | 4.45E-09 | 0.581899                    | Pqlc1     | 2.45E-08 | 0.948985                    |
| Lmna          | 4.75E-09 | 2.193325                    | Oat       | 2.49E-08 | 1.195354                    |
| Slc29a1       | 4.76E-09 | 0.910074                    | Wwtr1     | 2.60E-08 | 0.388284                    |
| Xdh           | 4.79E-09 | 0.632807                    | Spop      | 2.68E-08 | 0.929199                    |
| Ctsl          | 4.96E-09 | 2.517831                    | Vasn      | 2.80E-08 | 0.613634                    |
| Myl6          | 5.00E-09 | 1.681757                    | Prkcdbp   | 2.87E-08 | 0.447424                    |
| Nfib          | 5.05E-09 | 0.971933                    | Zbtb20    | 2.95E-08 | 1.091334                    |
| Myo6          | 5.07E-09 | 0.354367                    | Cd9       | 3.02E-08 | 1.539908                    |
| 2310022B05Rik | 5.61E-09 | 0.430534                    | Specc1    | 3.15E-08 | 0.505638                    |
| Mt2           | 5.65E-09 | 2.56344                     | Lgals1    | 3.18E-08 | 1.563118                    |
| Rtn4          | 5.79E-09 | 1.100887                    | Fabp5     | 3.20E-08 | 0.89522                     |
| Rhob          | 6.74E-09 | 0.954355                    | Abi2      | 3.27E-08 | 0.39234                     |
| Col4a2        | 6.85E-09 | 0.857308                    | Vegfa     | 3.43E-08 | 0.37344                     |

| Gene Name     | p-value  | log <sub>2</sub> FoldChange | Gene Name     | p-value  | log <sub>2</sub> FoldChange |
|---------------|----------|-----------------------------|---------------|----------|-----------------------------|
| Ahnak         | 3.45E-08 | 1.029006                    | P3h2          | 1.27E-07 | 0.417957                    |
| Dynll1        | 3.59E-08 | 1.337481                    | Cebpb         | 1.27E-07 | 1.323786                    |
| Egr2          | 3.72E-08 | 0.469278                    | Cited2        | 1.28E-07 | 1.256395                    |
| Fosb          | 3.78E-08 | 1.315735                    | Parp3         | 1.30E-07 | 0.348656                    |
| Rexo2         | 3.91E-08 | 0.809085                    | Ptms          | 1.31E-07 | 1.245247                    |
| Pros1         | 3.96E-08 | 0.495351                    | Fndc4         | 1.32E-07 | 0.312826                    |
| Nfia          | 4.17E-08 | 1.139699                    | Erf           | 1.38E-07 | 0.411177                    |
| Fkbp4         | 4.18E-08 | 0.898125                    | Sh3bgrl       | 1.39E-07 | 0.951406                    |
| Vipr1         | 4.25E-08 | 0.300306                    | Hmgn1         | 1.46E-07 | 1.16631                     |
| Fgfr1         | 4.36E-08 | 0.48947                     | Csf1          | 1.48E-07 | 0.71496                     |
| Sox9          | 4.80E-08 | 0.623565                    | Trim13        | 1.49E-07 | 0.340975                    |
| Cdkn1a        | 4.86E-08 | 1.184519                    | B230219D22Rik | 1.60E-07 | 0.677992                    |
| Pdcd6ip       | 5.08E-08 | 0.54243                     | Slc25a25      | 1.62E-07 | 0.833704                    |
| Cebpg         | 5.79E-08 | 0.690131                    | Clic4         | 1.62E-07 | 0.929471                    |
| Aldh2         | 5.94E-08 | 1.039874                    | Zyx           | 1.66E-07 | 0.828234                    |
| S100a11       | 6.20E-08 | 1.583184                    | Apobec3       | 1.67E-07 | 0.712608                    |
| Atpif1        | 6.54E-08 | 1.099698                    | Pgrmc1        | 1.67E-07 | 0.659866                    |
| Wls           | 6.64E-08 | 0.6258                      | Mast4         | 1.74E-07 | 0.912921                    |
| Galnt18       | 6.83E-08 | 0.320391                    | Casp12        | 1.76E-07 | 0.268347                    |
| Trf           | 6.93E-08 | 0.571405                    | Tcf7l1        | 1.76E-07 | 0.260652                    |
| Ccnd2         | 7.07E-08 | 1.160192                    | Gem           | 1.77E-07 | 1.029753                    |
| Il13ra1       | 7.43E-08 | 0.50853                     | Map1lc3a      | 1.88E-07 | 1.008428                    |
| Pdpk1         | 7.57E-08 | 0.508788                    | Nabp1         | 1.89E-07 | 0.617568                    |
| Rras          | 7.58E-08 | 0.477982                    | Cd63          | 1.92E-07 | 1.346879                    |
| Itpkc         | 7.87E-08 | 0.712841                    | 1810037I17Rik | 1.93E-07 | 1.068362                    |
| Mfhas1        | 8.19E-08 | 0.489221                    | Tlr2          | 1.94E-07 | 0.299589                    |
| Tulp4         | 8.38E-08 | 0.67149                     | Chd6          | 2.10E-07 | 0.425746                    |
| Arhgef5       | 8.59E-08 | 0.634534                    | Cldnd1        | 2.20E-07 | 0.779526                    |
| Spryd7        | 8.68E-08 | 0.390117                    | Azin1         | 2.27E-07 | 1.205971                    |
| 4930523C07Rik | 9.11E-08 | 1.314716                    | Sptan1        | 2.30E-07 | 0.508632                    |
| Znrf3         | 9.15E-08 | 0.370669                    | Laptm4a       | 2.32E-07 | 1.199717                    |
| Rsu1          | 9.17E-08 | 0.83943                     | S100a1        | 2.34E-07 | 0.775124                    |
| Hipk3         | 9.45E-08 | 0.550103                    | Gadd45b       | 2.41E-07 | 0.984623                    |
| Bag6          | 9.89E-08 | 0.634166                    | Ythdf3        | 2.44E-07 | 0.493578                    |
| Frmd6         | 1.08E-07 | 0.959994                    | Eps8l1        | 2.55E-07 | 0.373077                    |
| Tax1bp3       | 1.08E-07 | 0.765453                    | Tgfb1i1       | 2.69E-07 | 0.502445                    |
| Ccnl1         | 1.17E-07 | 0.905707                    | Myl12a        | 2.84E-07 | 1.086937                    |
| Trib1         | 1.19E-07 | 1.326225                    | Man1a2        | 2.88E-07 | 0.637026                    |
| Enpp5         | 1.20E-07 | 0.395542                    | Ddx5          | 2.92E-07 | 1.163805                    |
| Zfp36l1       | 1.22E-07 | 1.409655                    | Pja2          | 3.02E-07 | 0.514237                    |

| Gene Name     | p-value  | log <sub>2</sub> FoldChange | Gene Name | p-value  | log <sub>2</sub> FoldChange |
|---------------|----------|-----------------------------|-----------|----------|-----------------------------|
| Lrrc58        | 3.09E-07 | 0.629833                    | Atp1b3    | 8.64E-07 | 0.748151                    |
| Eps8l2        | 3.13E-07 | 0.415172                    | Bcr       | 8.73E-07 | 0.268938                    |
| Tmem41b       | 3.16E-07 | 0.587612                    | Gcnt2     | 8.95E-07 | 0.507243                    |
| Gstm1         | 3.18E-07 | 0.893024                    | Tpst1     | 9.01E-07 | 0.434927                    |
| Cmtm6         | 3.32E-07 | 0.549777                    | Sardh     | 9.01E-07 | 0.335027                    |
| 1700025G04Rik | 3.69E-07 | 0.544621                    | Ly6e      | 9.06E-07 | 0.920976                    |
| Postn         | 3.75E-07 | 0.654765                    | Cnp       | 9.10E-07 | 0.743466                    |
| Samd4         | 4.05E-07 | 0.330065                    | H3f3b     | 9.37E-07 | 1.444382                    |
| Pbx1          | 4.15E-07 | 0.888991                    | Hsd11b1   | 9.85E-07 | 0.330012                    |
| Pmepa1        | 4.33E-07 | 0.551259                    | Ubc       | 1.01E-06 | 1.347119                    |
| Rraga         | 4.36E-07 | 0.598681                    | Echdc2    | 1.05E-06 | 0.37426                     |
| Ldlr          | 4.38E-07 | 0.51348                     | Btg2      | 1.06E-06 | 1.172669                    |
| Hmgn3         | 4.39E-07 | 0.921602                    | Trim47    | 1.15E-06 | 0.459949                    |
| Timp3         | 4.46E-07 | 0.585005                    | Abl2      | 1.16E-06 | 0.340444                    |
| Klf6          | 4.54E-07 | 1.227636                    | Efr3a     | 1.19E-06 | 0.684098                    |
| Trp53bp2      | 4.63E-07 | 0.551765                    | Cpne8     | 1.19E-06 | 0.579633                    |
| Degs1         | 4.92E-07 | 0.897413                    | lfrd1     | 1.26E-06 | 1.112327                    |
| Rell1         | 4.93E-07 | 0.636058                    | lft57     | 1.29E-06 | 0.276608                    |
| Slc22a18      | 5.31E-07 | 0.278877                    | Ppp1r2    | 1.35E-06 | 0.7662                      |
| Ctsb          | 5.46E-07 | 0.906143                    | Mtdh      | 1.35E-06 | 0.755947                    |
| Nedd9         | 5.49E-07 | 0.758032                    | BC031181  | 1.36E-06 | 0.71849                     |
| Tusc3         | 5.52E-07 | 0.549014                    | Nptn      | 1.39E-06 | 0.743891                    |
| Pfkl          | 5.70E-07 | 0.472577                    | Arhgef16  | 1.45E-06 | 0.304639                    |
| Tppp3         | 5.75E-07 | 0.875547                    | Tmem70    | 1.46E-06 | 0.483236                    |
| Cfap43        | 6.05E-07 | 0.315369                    | Celsr2    | 1.49E-06 | 0.379933                    |
| Smoc2         | 6.23E-07 | 0.400205                    | Fam129a   | 1.49E-06 | 0.710873                    |
| Serpine2      | 6.49E-07 | 0.544863                    | Nfe2l2    | 1.53E-06 | 0.552593                    |
| Anxa6         | 6.50E-07 | 0.873519                    | Hars      | 1.55E-06 | 0.485052                    |
| Kank2         | 6.61E-07 | 0.306911                    | Calm2     | 1.64E-06 | 1.023429                    |
| Cdkn1c        | 6.84E-07 | 0.318474                    | Camsap2   | 1.80E-06 | 0.309185                    |
| Irf6          | 6.87E-07 | 0.448892                    | Fem1b     | 1.84E-06 | 0.484681                    |
| Arrdc4        | 6.92E-07 | 0.63686                     | Fah       | 1.84E-06 | 0.416604                    |
| Jup           | 6.99E-07 | 0.75372                     | Eif1a     | 1.89E-06 | 0.875631                    |
| C2cd4b        | 7.27E-07 | 0.503865                    | Clock     | 1.93E-06 | 0.345038                    |
| Eil1          | 7.38E-07 | 0.394213                    | Lmo4      | 1.95E-06 | 0.754461                    |
| Net1          | 7.80E-07 | 0.640425                    | Nipa2     | 2.02E-06 | 0.471196                    |
| Ngfrap1       | 7.85E-07 | 0.723143                    | Morf4l1   | 2.26E-06 | 0.933869                    |
| Atat1         | 7.93E-07 | 0.302825                    | Marcksl1  | 2.29E-06 | 0.944361                    |
| Pacsin2       | 8.43E-07 | 0.533117                    | Sepw1     | 2.35E-06 | 0.913698                    |
| Gpx4          | 8.50E-07 | 0.947977                    | Cfl2      | 2.35E-06 | 0.726222                    |



| Gene Name | p-value  | log <sub>2</sub> FoldChange | Gene Name | p-value  | log <sub>2</sub> FoldChange |
|-----------|----------|-----------------------------|-----------|----------|-----------------------------|
| Purb      | 2.36E-06 | 0.713318                    | Slmap     | 5.38E-06 | 0.50738                     |
| Dpysl3    | 2.46E-06 | 0.437057                    | Lgals9    | 5.42E-06 | 0.33575                     |
| Sat1      | 2.55E-06 | 1.063503                    | Lama5     | 5.56E-06 | 0.307955                    |
| N4bp3     | 2.67E-06 | 0.303823                    | Kif1c     | 5.77E-06 | 0.471272                    |
| Tmem176b  | 2.68E-06 | 0.603626                    | Agrn      | 5.89E-06 | 0.360534                    |
| Hnrnp1    | 2.80E-06 | 0.598455                    | Tns2      | 5.92E-06 | 0.284085                    |
| Phkb      | 2.82E-06 | 0.423365                    | Cyb5r3    | 6.40E-06 | 0.680199                    |
| Psmc5     | 2.83E-06 | 0.543498                    | Dimt1     | 6.53E-06 | 0.328758                    |
| Ephx1     | 3.05E-06 | 0.525026                    | Gas2l1    | 6.93E-06 | 0.348587                    |
| Baiap2    | 3.09E-06 | 0.745586                    | Vps37a    | 7.14E-06 | 0.41068                     |
| Camkk2    | 3.22E-06 | 0.53498                     | Mgp       | 7.42E-06 | 0.805292                    |
| Rassf1    | 3.32E-06 | 1.059759                    | Has2      | 7.43E-06 | 0.267676                    |
| Ephb4     | 3.34E-06 | 0.282082                    | Csrnp1    | 7.45E-06 | 0.87356                     |
| Slc38a2   | 3.50E-06 | 0.659048                    | Rheb      | 7.62E-06 | 0.682302                    |
| Spin1     | 3.53E-06 | 0.606165                    | Zfp36l2   | 7.76E-06 | 0.953947                    |
| Sorl1     | 3.55E-06 | 0.54601                     | Socs3     | 7.93E-06 | 0.780295                    |
| Eif3b     | 3.58E-06 | 0.651152                    | Slc25a4   | 8.18E-06 | 1.060644                    |
| Ttc28     | 3.61E-06 | 0.49429                     | Ruvbl2    | 8.20E-06 | 0.469008                    |
| Gstm7     | 3.70E-06 | 0.369872                    | Gabarapl1 | 8.53E-06 | 0.677296                    |
| Ddx3x     | 3.78E-06 | 0.99867                     | Rhoj      | 8.56E-06 | 0.562772                    |
| Tnfrsf1a  | 3.79E-06 | 0.828787                    | Rbbp4     | 8.60E-06 | 0.661853                    |
| Fryl      | 3.88E-06 | 0.613977                    | Irgm1     | 8.65E-06 | 0.668734                    |
| Trim35    | 4.03E-06 | 0.327563                    | Gpd2      | 8.76E-06 | 0.449473                    |
| Cib2      | 4.10E-06 | 0.494753                    | Pdcl3     | 8.84E-06 | 0.645135                    |
| Eif5      | 4.10E-06 | 0.98436                     | Hprt      | 8.86E-06 | 0.659416                    |
| Smarca2   | 4.32E-06 | 0.825558                    | Rnd3      | 9.10E-06 | 0.379456                    |
| Rab34     | 4.33E-06 | 0.372716                    | Aes       | 9.12E-06 | 0.75848                     |
| Tuba1a    | 4.45E-06 | 0.707245                    | Fus       | 9.16E-06 | 0.876974                    |
| Ets2      | 4.45E-06 | 0.781963                    | Dusp1     | 9.25E-06 | 0.560019                    |
| Nfkbia    | 4.54E-06 | 0.977454                    | Hspa9     | 9.36E-06 | 0.571233                    |
| Pkd2      | 4.61E-06 | 0.31987                     | Errfi1    | 9.39E-06 | 0.870179                    |
| Ptges3    | 4.79E-06 | 0.639207                    | Tnfsf12   | 9.43E-06 | 0.485525                    |
| Clk4      | 4.92E-06 | 0.521514                    | Nrbp2     | 9.47E-06 | 0.685227                    |
| Csde1     | 5.00E-06 | 0.609851                    | Igfbp6    | 9.92E-06 | 0.40598                     |
| Map3k8    | 5.07E-06 | 0.803165                    | Hcfc1r1   | 1.02E-05 | 0.690848                    |
| Parva     | 5.08E-06 | 0.474455                    | Eif6      | 1.02E-05 | 0.725715                    |
| Hnrnp1    | 5.31E-06 | 0.609167                    | Ifitm2    | 1.02E-05 | 1.060701                    |
| Map2k5    | 5.31E-06 | 0.374527                    | Trappc10  | 1.06E-05 | 0.306961                    |
| Cyth2     | 5.35E-06 | 0.581335                    | Ywhaz     | 1.06E-05 | 0.795211                    |
| Tuba1c    | 5.37E-06 | 1.118899                    | Eif1      | 1.08E-05 | 0.791924                    |

| Gene Name | p-value  | log <sub>2</sub> FoldChange | Gene Name | p-value  | log <sub>2</sub> FoldChange |
|-----------|----------|-----------------------------|-----------|----------|-----------------------------|
| Btg3      | 1.08E-05 | 0.534158                    | Sertad1   | 2.33E-05 | 0.585966                    |
| Crispld2  | 1.09E-05 | 0.49824                     | Prkar1a   | 2.34E-05 | 0.744619                    |
| Nat6      | 1.09E-05 | 0.422462                    | Wdr13     | 2.46E-05 | 0.325724                    |
| Krt8      | 1.11E-05 | 1.104223                    | Naa15     | 2.50E-05 | 0.423896                    |
| Grwd1     | 1.12E-05 | 0.308146                    | Eif4g1    | 2.52E-05 | 0.712447                    |
| Maged2    | 1.18E-05 | 0.357217                    | Tgfbr2    | 2.53E-05 | 0.442925                    |
| Oaz2      | 1.18E-05 | 0.537975                    | Tsen34    | 2.54E-05 | 0.522592                    |
| Jag1      | 1.21E-05 | 0.449789                    | Chka      | 2.63E-05 | 0.51462                     |
| Malat1    | 1.23E-05 | 0.964852                    | Hnrnpab   | 2.71E-05 | 0.526674                    |
| Ccser2    | 1.25E-05 | 0.751465                    | Capzb     | 2.76E-05 | 0.749583                    |
| Tubb2a    | 1.26E-05 | 0.678325                    | Kctd1     | 2.77E-05 | 0.436695                    |
| Eif4a2    | 1.28E-05 | 0.734678                    | Ripk4     | 2.77E-05 | 0.303264                    |
| Emp2      | 1.30E-05 | 0.816325                    | Nop58     | 2.86E-05 | 0.727328                    |
| Gadd45a   | 1.34E-05 | 0.647759                    | Plxdc2    | 2.89E-05 | 0.644648                    |
| Prdx5     | 1.35E-05 | 0.723982                    | Tars      | 2.92E-05 | 0.382412                    |
| Tceb2     | 1.35E-05 | 0.785514                    | Capn2     | 2.93E-05 | 0.390501                    |
| Sertad2   | 1.38E-05 | 0.48082                     | Prdx1     | 2.97E-05 | 0.799405                    |
| G3bp2     | 1.42E-05 | 0.472411                    | Ptov1     | 3.00E-05 | 0.627133                    |
| Usp53     | 1.42E-05 | 0.289448                    | Amotl2    | 3.01E-05 | 0.412195                    |
| Lamp1     | 1.42E-05 | 0.739788                    | Pigp      | 3.03E-05 | 0.618757                    |
| Map2      | 1.43E-05 | 0.323896                    | Tspan3    | 3.12E-05 | 0.532209                    |
| Jmy       | 1.47E-05 | 0.287838                    | Fth1      | 3.18E-05 | 0.709502                    |
| Tsc22d2   | 1.47E-05 | 0.75039                     | Vapa      | 3.19E-05 | 0.578598                    |
| Slc5a3    | 1.51E-05 | 0.427372                    | Rnf121    | 3.20E-05 | 0.313224                    |
| Ilk       | 1.56E-05 | 0.534274                    | Tjp2      | 3.23E-05 | 0.311986                    |
| Ccl7      | 1.72E-05 | 0.653334                    | Erc1      | 3.32E-05 | 0.274341                    |
| Mrps6     | 1.75E-05 | 0.531872                    | Ppp1r12c  | 3.33E-05 | 0.439115                    |
| Mif       | 1.80E-05 | 0.668817                    | Hsp90aa1  | 3.39E-05 | 0.878311                    |
| Sema3c    | 1.90E-05 | 0.272017                    | Rab18     | 3.44E-05 | 0.718344                    |
| Snhg18    | 1.91E-05 | 0.620071                    | Gfm1      | 3.44E-05 | 0.29465                     |
| Abtb2     | 1.96E-05 | 0.297525                    | Rchy1     | 3.45E-05 | 0.609985                    |
| Rnf122    | 1.97E-05 | 0.339594                    | Adm       | 3.53E-05 | 0.672126                    |
| Jund      | 2.00E-05 | 0.779924                    | Swi5      | 3.62E-05 | 0.495451                    |
| Fst       | 2.01E-05 | 0.796951                    | N6amt1    | 3.62E-05 | 0.311066                    |
| Mprp      | 2.03E-05 | 0.497256                    | Evi5      | 3.73E-05 | 0.302578                    |
| Mrpl27    | 2.05E-05 | 0.603379                    | Ncor2     | 3.73E-05 | 0.432168                    |
| Lix1l     | 2.07E-05 | 0.269305                    | Pprc1     | 3.77E-05 | 0.265872                    |
| Gspt1     | 2.13E-05 | 0.493164                    | Zfand5    | 3.78E-05 | 0.616041                    |
| Cstb      | 2.15E-05 | 1.064817                    | Naf1      | 3.87E-05 | 0.363592                    |
| Pdzd8     | 2.23E-05 | 0.326334                    | Bsg       | 3.91E-05 | 0.733607                    |

| Gene Name     | p-value  | log <sub>2</sub> FoldChange | Gene Name     | p-value  | log <sub>2</sub> FoldChange |
|---------------|----------|-----------------------------|---------------|----------|-----------------------------|
| Aldoa         | 3.92E-05 | 0.787479                    | Fyttd1        | 7.01E-05 | 0.426555                    |
| Ski           | 3.95E-05 | 0.531319                    | Mafk          | 7.37E-05 | 0.433992                    |
| Smarca5       | 3.95E-05 | 0.713297                    | Top1          | 7.54E-05 | 0.568113                    |
| Nfic          | 3.96E-05 | 0.551623                    | Clcn4         | 7.57E-05 | 0.448865                    |
| Cebpa         | 4.02E-05 | 0.642982                    | Vamp5         | 7.64E-05 | 0.293988                    |
| Abi3bp        | 4.05E-05 | 0.368767                    | Idh3a         | 7.87E-05 | 0.439852                    |
| Igf1r         | 4.11E-05 | 0.619942                    | 2310036O22Rik | 7.89E-05 | 0.595425                    |
| Gm2a          | 4.17E-05 | 0.372984                    | Pink1         | 7.99E-05 | 0.611634                    |
| Nfix          | 4.30E-05 | 0.699585                    | Ap1g1         | 8.07E-05 | 0.278584                    |
| Rab6a         | 4.32E-05 | 0.807846                    | Mapk6         | 8.23E-05 | 0.317499                    |
| Gnas          | 4.32E-05 | 0.706234                    | Gapvd1        | 8.27E-05 | 0.355282                    |
| Fnta          | 4.38E-05 | 0.445324                    | Ppp1cb        | 8.32E-05 | 0.895554                    |
| Il34          | 4.47E-05 | 0.435902                    | Trim8         | 8.38E-05 | 0.79851                     |
| Inpp5a        | 4.49E-05 | 0.275117                    | Gapdh         | 8.47E-05 | 0.644478                    |
| Ndufa1        | 4.51E-05 | 0.60958                     | Dnaja1        | 8.52E-05 | 0.798977                    |
| Coq10b        | 4.67E-05 | 0.722797                    | Wdr1          | 8.56E-05 | 0.720446                    |
| Tceb1         | 4.70E-05 | 0.666636                    | Gbp7          | 8.60E-05 | 0.626269                    |
| U2af1         | 4.84E-05 | 0.505267                    | Pam           | 8.75E-05 | 0.785485                    |
| Actb          | 4.90E-05 | 1.04195                     | Ktn1          | 8.77E-05 | 0.5402                      |
| Cd164         | 4.95E-05 | 0.835211                    | Trim44        | 8.78E-05 | 0.334454                    |
| Mapkapk2      | 4.95E-05 | 0.54751                     | Dyrk1a        | 8.87E-05 | 0.333054                    |
| Itm2b         | 5.00E-05 | 0.610991                    | Slc43a3       | 8.88E-05 | 0.328099                    |
| 1110008P14Rik | 5.03E-05 | 0.561931                    | Maff          | 8.93E-05 | 0.755874                    |
| Taf13         | 5.05E-05 | 0.572228                    | Camta1        | 8.95E-05 | 0.388132                    |
| Josd2         | 5.17E-05 | 0.531525                    | Bicd2         | 9.13E-05 | 0.295149                    |
| Tmbim1        | 5.25E-05 | 0.529283                    | Ier3          | 9.16E-05 | 0.555806                    |
| Usp25         | 5.33E-05 | 0.337621                    | Usp50         | 9.18E-05 | 0.556566                    |
| Lima1         | 5.59E-05 | 0.690352                    | Herc2         | 9.34E-05 | 0.285027                    |
| Sh3d19        | 5.69E-05 | 0.368985                    | Eif1ax        | 9.63E-05 | 0.584996                    |
| Kcnq1ot1      | 5.81E-05 | 0.428133                    | Nap1l4        | 9.69E-05 | 0.4311                      |
| Hnrnpu        | 5.85E-05 | 0.531365                    | Atg101        | 1.05E-04 | 0.389989                    |
| Tagln2        | 5.90E-05 | 0.721762                    | Eprs          | 1.05E-04 | 0.701851                    |
| Por           | 6.33E-05 | 0.401241                    | Crybg3        | 1.06E-04 | 0.431728                    |
| BC005537      | 6.35E-05 | 0.514027                    | Crim1         | 1.06E-04 | 0.26025                     |
| Gnai2         | 6.40E-05 | 0.628228                    | Cd24a         | 1.06E-04 | 1.124858                    |
| Hif1a         | 6.49E-05 | 0.480361                    | Rab1a         | 1.08E-04 | 0.545844                    |
| Dido1         | 6.75E-05 | 0.307344                    | Znrf1         | 1.09E-04 | 0.44742                     |
| Chmp4b        | 6.90E-05 | 0.556556                    | Jun           | 1.09E-04 | 1.267714                    |
| Mfn1          | 6.93E-05 | 0.335609                    | Cox6c         | 1.09E-04 | 0.67343                     |
| Snx9          | 6.97E-05 | 0.357881                    | Vmac          | 1.11E-04 | 0.316756                    |

| Gene Name     | p-value  | log <sub>2</sub> FoldChange | Gene Name | p-value  | log <sub>2</sub> FoldChange |
|---------------|----------|-----------------------------|-----------|----------|-----------------------------|
| Acsl3         | 1.12E-04 | 0.393916                    | Ndufb9    | 1.73E-04 | 0.525797                    |
| Hk2           | 1.14E-04 | 0.595358                    | Fdft1     | 1.74E-04 | 0.405453                    |
| Selk          | 1.15E-04 | 0.634901                    | Pgpep1    | 1.75E-04 | 0.483927                    |
| Pnrc1         | 1.16E-04 | 0.67285                     | Rassf4    | 1.75E-04 | 0.260416                    |
| Psmc7         | 1.16E-04 | 0.544747                    | Hsd17b10  | 1.77E-04 | 0.745305                    |
| Hsp90ab1      | 1.18E-04 | 0.711476                    | Minos1    | 1.80E-04 | 0.527836                    |
| Usp33         | 1.18E-04 | 0.330654                    | Actg1     | 1.80E-04 | 0.638447                    |
| Ulk2          | 1.19E-04 | 0.310846                    | Smad1     | 1.81E-04 | 0.452444                    |
| Atf6b         | 1.19E-04 | 0.371388                    | Tfe3      | 1.83E-04 | 0.308875                    |
| Tor1aip1      | 1.28E-04 | 0.587665                    | Tapbp     | 1.84E-04 | 0.54942                     |
| Gda           | 1.28E-04 | 0.321123                    | Ext2      | 1.86E-04 | 0.483334                    |
| Tmem245       | 1.30E-04 | 0.306019                    | Rbms1     | 1.86E-04 | 0.596077                    |
| Ero1l         | 1.32E-04 | 0.649368                    | Mapk1ip1l | 1.89E-04 | 0.34077                     |
| Fndc3b        | 1.32E-04 | 0.319261                    | Pebp1     | 1.90E-04 | 0.593327                    |
| Ppm1g         | 1.34E-04 | 0.462368                    | Ube2d3    | 1.92E-04 | 0.807719                    |
| Ano1          | 1.35E-04 | 0.510856                    | Spint2    | 1.96E-04 | 0.626306                    |
| Bach1         | 1.39E-04 | 0.390882                    | St3gal4   | 1.99E-04 | 0.402811                    |
| Slc3a2        | 1.40E-04 | 0.792454                    | Csnk1a1   | 2.00E-04 | 0.780555                    |
| Serinc3       | 1.41E-04 | 0.394465                    | Rrp1      | 2.00E-04 | 0.61666                     |
| Fam120a       | 1.41E-04 | 0.564594                    | Cherp     | 2.02E-04 | 0.283598                    |
| Ugp2          | 1.42E-04 | 0.401831                    | Frmd4b    | 2.03E-04 | 0.495698                    |
| Psap          | 1.42E-04 | 0.399963                    | Lamp2     | 2.04E-04 | 0.608904                    |
| Mpzl2         | 1.43E-04 | 0.330856                    | Polr2l    | 2.08E-04 | 0.731346                    |
| Wwp2          | 1.43E-04 | 0.305417                    | Fam101b   | 2.10E-04 | 0.251132                    |
| Cobll1        | 1.43E-04 | 0.387898                    | Cyb561    | 2.12E-04 | 0.662701                    |
| Rap2b         | 1.44E-04 | 0.433629                    | Serpib6a  | 2.17E-04 | 0.396906                    |
| Rcn2          | 1.44E-04 | 0.634262                    | Cul3      | 2.22E-04 | 0.431265                    |
| Eid1          | 1.45E-04 | 0.443146                    | Ppp2r2a   | 2.22E-04 | 0.501873                    |
| Mdh2          | 1.49E-04 | 0.72936                     | Mllt4     | 2.24E-04 | 0.360303                    |
| Tiam1         | 1.50E-04 | 0.422721                    | Pkp4      | 2.25E-04 | 0.461121                    |
| Hnrnpk        | 1.59E-04 | 0.737002                    | Srf       | 2.27E-04 | 0.280657                    |
| Itm2c         | 1.59E-04 | 0.890454                    | Csad      | 2.32E-04 | 0.444169                    |
| Tpp1          | 1.60E-04 | 0.326414                    | Calm1     | 2.33E-04 | 0.470018                    |
| Ank3          | 1.60E-04 | 0.258922                    | Cast      | 2.39E-04 | 0.317417                    |
| Fos           | 1.61E-04 | 1.542915                    | Akap9     | 2.43E-04 | 0.416696                    |
| Eif4a1        | 1.62E-04 | 0.823085                    | Ctnnb1    | 2.44E-04 | 0.744742                    |
| 2010111I01Rik | 1.66E-04 | 0.700247                    | Zfp644    | 2.47E-04 | 0.497924                    |
| Tm9sf3        | 1.67E-04 | 0.551033                    | Bcl7c     | 2.47E-04 | 0.444632                    |
| Snap47        | 1.67E-04 | 0.457373                    | Tdg       | 2.49E-04 | 0.301956                    |
| Fgfr2         | 1.71E-04 | 0.454811                    | Gnb1      | 2.51E-04 | 0.651909                    |

| Gene Name  | p-value  | log <sub>2</sub> FoldChange | Gene Name     | p-value  | log <sub>2</sub> FoldChange |
|------------|----------|-----------------------------|---------------|----------|-----------------------------|
| Ier5       | 2.51E-04 | 0.538926                    | Pdlim3        | 3.83E-04 | 0.339243                    |
| Opa3       | 2.57E-04 | 0.355177                    | Lzts2         | 3.84E-04 | 0.53524                     |
| Ptbp1      | 2.59E-04 | 0.580842                    | Nfkb1         | 3.93E-04 | 0.640874                    |
| Slc25a1    | 2.60E-04 | 0.457762                    | Nol11         | 3.93E-04 | 0.256898                    |
| Tmbim6     | 2.60E-04 | 0.465101                    | Abcd3         | 3.94E-04 | 0.377339                    |
| Spr        | 2.62E-04 | 0.333281                    | Stat3         | 4.05E-04 | 0.689905                    |
| Serbp1     | 2.66E-04 | 0.562498                    | Ndufa4        | 4.09E-04 | 0.542833                    |
| Rabep1     | 2.70E-04 | 0.326208                    | Iscu          | 4.11E-04 | 0.496691                    |
| Col18a1    | 2.70E-04 | 0.359888                    | Gls           | 4.11E-04 | 0.494724                    |
| Sfr1       | 2.85E-04 | 0.7027                      | Arhgap5       | 4.16E-04 | 0.411848                    |
| Son        | 2.85E-04 | 0.658563                    | Nf1           | 4.18E-04 | 0.331658                    |
| Bcl10      | 2.86E-04 | 0.512539                    | Syncrip       | 4.18E-04 | 0.489554                    |
| Rpn1       | 2.87E-04 | 0.397628                    | Pxn           | 4.23E-04 | 0.575688                    |
| Srrm2      | 2.89E-04 | 0.653833                    | Snrpb         | 4.24E-04 | 0.514678                    |
| Srsf5      | 2.98E-04 | 0.626967                    | Spry2         | 4.25E-04 | 0.741761                    |
| Polr2f     | 2.99E-04 | 0.663142                    | Tes           | 4.25E-04 | 0.481454                    |
| Mlxip      | 3.05E-04 | 0.320407                    | Fam134b       | 4.28E-04 | 0.657444                    |
| Bnip2      | 3.05E-04 | 0.547396                    | Usp5          | 4.29E-04 | 0.344805                    |
| Hsbp1      | 3.07E-04 | 0.733319                    | Kif5b         | 4.29E-04 | 0.571053                    |
| D10Wsu102e | 3.11E-04 | 0.318035                    | Rhbdf1        | 4.41E-04 | 0.366453                    |
| Lims1      | 3.13E-04 | 0.51881                     | Ywhaq         | 4.43E-04 | 0.516634                    |
| Ifi47      | 3.14E-04 | 0.251439                    | Uap1          | 4.48E-04 | 0.704054                    |
| Ogdh       | 3.15E-04 | 0.729098                    | Chchd6        | 4.63E-04 | 0.309131                    |
| Sox4       | 3.21E-04 | 1.172635                    | Lonp2         | 4.64E-04 | 0.280042                    |
| Arf6       | 3.23E-04 | 0.566423                    | Anxa5         | 4.80E-04 | 0.777478                    |
| Ndufa5     | 3.26E-04 | 0.53634                     | Al837181      | 4.80E-04 | 0.304956                    |
| Ccdc124    | 3.29E-04 | 0.40703                     | Ppp2cb        | 4.83E-04 | 0.3971                      |
| Eif4g2     | 3.39E-04 | 0.61292                     | Stk39         | 4.88E-04 | 0.486543                    |
| Inadl      | 3.46E-04 | 0.407093                    | Vps35         | 4.88E-04 | 0.507136                    |
| Numb       | 3.46E-04 | 0.384189                    | Nek7          | 4.90E-04 | 0.401411                    |
| Hspa5      | 3.47E-04 | 0.82832                     | Yap1          | 4.90E-04 | 0.663337                    |
| Kdm6b      | 3.51E-04 | 0.832623                    | Cnn2          | 4.99E-04 | 0.419125                    |
| Akr1a1     | 3.51E-04 | 0.451287                    | 2810474O19Rik | 5.09E-04 | 0.597239                    |
| Mzt2       | 3.54E-04 | 0.3198                      | Tmem65        | 5.12E-04 | 0.636128                    |
| Capza2     | 3.59E-04 | 0.376975                    | Phip          | 5.17E-04 | 0.35498                     |
| Odc1       | 3.62E-04 | 0.521009                    | Smim14        | 5.18E-04 | 0.38652                     |
| Mafg       | 3.66E-04 | 0.526138                    | Pax9          | 5.19E-04 | 0.617436                    |
| Klhl21     | 3.70E-04 | 0.403576                    | Klf10         | 5.20E-04 | 0.404728                    |
| Nudt9      | 3.70E-04 | 0.469143                    | Gdi1          | 5.34E-04 | 0.311495                    |
| Tiparp     | 3.72E-04 | 0.639108                    | Mesdc2        | 5.40E-04 | 0.289177                    |

| Gene Name | p-value  | log <sub>2</sub> FoldChange | Gene Name     | p-value  | log <sub>2</sub> FoldChange |
|-----------|----------|-----------------------------|---------------|----------|-----------------------------|
| Kidins220 | 5.43E-04 | 0.256427                    | Tmem256       | 6.89E-04 | 0.560052                    |
| Nufip2    | 5.53E-04 | 0.322958                    | Bhlhe40       | 7.04E-04 | 0.458628                    |
| Eef1d     | 5.54E-04 | 0.579134                    | Kazn          | 7.06E-04 | 0.300693                    |
| Ikbip     | 5.54E-04 | 0.291736                    | Ndfip2        | 7.09E-04 | 0.634978                    |
| Rnf10     | 5.58E-04 | 0.54129                     | Tmco1         | 7.14E-04 | 0.516552                    |
| Smc1a     | 5.59E-04 | 0.552775                    | St3gal5       | 7.21E-04 | 0.26042                     |
| Pafah1b1  | 5.61E-04 | 0.514916                    | Junb          | 7.26E-04 | 0.701051                    |
| Rcn1      | 5.69E-04 | 0.605514                    | Qrich1        | 7.36E-04 | 0.338973                    |
| Med22     | 5.69E-04 | 0.331748                    | Ppia          | 7.36E-04 | 0.529796                    |
| Snhg12    | 5.74E-04 | 0.434949                    | Eif2s3x       | 7.37E-04 | 0.287358                    |
| Ywhah     | 5.74E-04 | 0.697763                    | Gsk3a         | 7.38E-04 | 0.407837                    |
| Psmc12    | 5.76E-04 | 0.354758                    | Fat1          | 7.49E-04 | 0.259511                    |
| Nfe2l1    | 5.82E-04 | 0.414485                    | Eif4g3        | 7.50E-04 | 0.374436                    |
| Pcm1      | 5.91E-04 | 0.310553                    | Hdac1         | 7.54E-04 | 0.479998                    |
| Crtc3     | 5.94E-04 | 0.515976                    | Unc45a        | 7.54E-04 | 0.412916                    |
| Arpc1a    | 5.98E-04 | 0.506581                    | Dip2b         | 7.64E-04 | 0.350522                    |
| Set       | 5.99E-04 | 0.507616                    | Tpd52         | 7.67E-04 | 0.626963                    |
| Gna11     | 5.99E-04 | 0.329861                    | Rhot1         | 7.75E-04 | 0.291913                    |
| Timm8b    | 6.05E-04 | 0.627787                    | Zfp652        | 7.77E-04 | 0.343015                    |
| Mbnl2     | 6.12E-04 | 0.433402                    | Cbx6          | 7.77E-04 | 0.3426                      |
| Akirin1   | 6.13E-04 | 0.300861                    | Stau1         | 7.79E-04 | 0.320328                    |
| Tpp2      | 6.15E-04 | 0.341195                    | Shc1          | 7.92E-04 | 0.336871                    |
| Zfc3h1    | 6.28E-04 | 0.498914                    | Ankrd13c      | 7.93E-04 | 0.357467                    |
| Atp5b     | 6.36E-04 | 0.410791                    | Apbb2         | 7.95E-04 | 0.281647                    |
| Psma3     | 6.36E-04 | 0.473576                    | Ifi27         | 7.96E-04 | 0.516469                    |
| Map7d1    | 6.40E-04 | 0.482678                    | Uqcrb         | 8.05E-04 | 0.42706                     |
| Tprgl     | 6.42E-04 | 0.686748                    | Atf4          | 8.08E-04 | 0.765204                    |
| Gss       | 6.53E-04 | 0.355782                    | Arl5b         | 8.31E-04 | 0.466971                    |
| Srsf2     | 6.56E-04 | 0.676667                    | Nisch         | 8.36E-04 | 0.581393                    |
| Nhp2l1    | 6.58E-04 | 0.581154                    | Rbm39         | 8.36E-04 | 0.587599                    |
| Yaf2      | 6.58E-04 | 0.392291                    | 4833439L19Rik | 8.46E-04 | 0.514047                    |
| Ptgfrn    | 6.66E-04 | 0.365973                    | Ppan          | 8.53E-04 | 0.339684                    |
| Srsf6     | 6.70E-04 | 0.531956                    | Zmpste24      | 8.65E-04 | 0.336563                    |
| Dynlt3    | 6.71E-04 | 0.555042                    | Strn3         | 8.72E-04 | 0.496714                    |
| Wdr26     | 6.78E-04 | 0.469412                    | Hdgf          | 8.90E-04 | 0.49475                     |
| Wsb1      | 6.78E-04 | 0.545802                    | Ehf           | 8.99E-04 | 0.647573                    |
| Rab5b     | 6.84E-04 | 0.294283                    | Ost4          | 9.02E-04 | 0.598821                    |
| Ctsd      | 6.85E-04 | 0.51629                     | Itgb1         | 9.11E-04 | 0.642274                    |
| Hadha     | 6.85E-04 | 0.345042                    | Mef2a         | 9.16E-04 | 0.394646                    |
| Emc10     | 6.88E-04 | 0.425501                    | Plekha1       | 9.20E-04 | 0.365174                    |

| Gene Name | p-value  | log <sub>2</sub> FoldChange | Gene Name | p-value  | log <sub>2</sub> FoldChange |
|-----------|----------|-----------------------------|-----------|----------|-----------------------------|
| Cpne3     | 9.47E-04 | 0.357114                    | Chchd2    | 1.31E-03 | 0.486636                    |
| Sec62     | 9.55E-04 | 0.579651                    | Arf4      | 1.31E-03 | 0.447703                    |
| Tet3      | 9.59E-04 | 0.282576                    | Prnp      | 1.32E-03 | 0.261647                    |
| Enc1      | 9.59E-04 | 0.257351                    | Usp34     | 1.32E-03 | 0.31217                     |
| Gstt1     | 9.59E-04 | 0.352068                    | Nfat5     | 1.32E-03 | 0.61734                     |
| Fam220a   | 9.62E-04 | 0.485551                    | Pstk      | 1.35E-03 | 0.365687                    |
| Yae1d1    | 9.68E-04 | 0.40505                     | Hexim1    | 1.36E-03 | 0.259087                    |
| Dnajb2    | 9.71E-04 | 0.344966                    | Tgif2     | 1.38E-03 | 0.414965                    |
| Tmem109   | 9.72E-04 | 0.519631                    | Rcn3      | 1.38E-03 | 0.293789                    |
| Pfn1      | 9.78E-04 | 0.479935                    | Sik2      | 1.40E-03 | 0.392918                    |
| Tmed10    | 9.78E-04 | 0.6288                      | Tspan4    | 1.41E-03 | 0.398816                    |
| Sirt2     | 9.88E-04 | 0.352918                    | Cfl1      | 1.41E-03 | 0.538284                    |
| Pkm       | 9.92E-04 | 0.411429                    | Hk1       | 1.43E-03 | 0.27847                     |
| Lamc1     | 1.02E-03 | 0.30876                     | Nras      | 1.43E-03 | 0.521359                    |
| Smim7     | 1.03E-03 | 0.565255                    | Calr      | 1.43E-03 | 0.443294                    |
| Map2k3    | 1.04E-03 | 0.833032                    | Nipal2    | 1.45E-03 | 0.461129                    |
| Rab14     | 1.04E-03 | 0.527698                    | Mpzl1     | 1.47E-03 | 0.577671                    |
| Sde2      | 1.06E-03 | 0.488693                    | Coa5      | 1.48E-03 | 0.389019                    |
| Hdgrfp3   | 1.06E-03 | 0.250321                    | Hdac2     | 1.49E-03 | 0.361395                    |
| Xpr1      | 1.07E-03 | 0.292396                    | Ube2r2    | 1.52E-03 | 0.439815                    |
| Tceal8    | 1.08E-03 | 0.528432                    | Hmox1     | 1.55E-03 | 0.692744                    |
| Foxc1     | 1.09E-03 | 0.659753                    | Hnrnpa2b1 | 1.57E-03 | 0.551118                    |
| P4hb      | 1.10E-03 | 0.378509                    | Tmem57    | 1.59E-03 | 0.396108                    |
| Msrb1     | 1.10E-03 | 0.684033                    | Ppa2      | 1.61E-03 | 0.343129                    |
| Fubp3     | 1.11E-03 | 0.315349                    | Neat1     | 1.62E-03 | 0.878548                    |
| Osgin2    | 1.15E-03 | 0.473158                    | Itpkb     | 1.63E-03 | 0.641775                    |
| Clic1     | 1.15E-03 | 0.45859                     | Gng5      | 1.64E-03 | 0.382406                    |
| Ppp3ca    | 1.16E-03 | 0.658041                    | D17Wsu92e | 1.68E-03 | 0.530801                    |
| Numa1     | 1.16E-03 | 0.325269                    | Hnrnpf    | 1.71E-03 | 0.399831                    |
| Il6st     | 1.18E-03 | 0.446263                    | Ubb       | 1.74E-03 | 0.533288                    |
| Epha5     | 1.19E-03 | 0.351324                    | Cox6a1    | 1.75E-03 | 0.46376                     |
| Nudc      | 1.19E-03 | 0.666228                    | Comt      | 1.76E-03 | 0.440086                    |
| Gpx8      | 1.21E-03 | 0.486615                    | Ldha      | 1.83E-03 | 0.554468                    |
| Hdac4     | 1.22E-03 | 0.358251                    | Psmc2     | 1.84E-03 | 0.469562                    |
| Ppp1r15a  | 1.25E-03 | 0.675538                    | Ociad1    | 1.84E-03 | 0.591889                    |
| Map1lc3b  | 1.26E-03 | 0.567677                    | Impa1     | 1.87E-03 | 0.368837                    |
| Krt23     | 1.26E-03 | 0.619285                    | Klc3      | 1.88E-03 | 0.442089                    |
| Derl1     | 1.27E-03 | 0.404432                    | Ypel5     | 1.88E-03 | 0.366221                    |
| Psmd5     | 1.28E-03 | 0.301219                    | Gm26532   | 1.88E-03 | 0.502777                    |
| Ttc19     | 1.29E-03 | 0.400467                    | Tra2a     | 1.89E-03 | 0.450672                    |

| Gene Name | p-value  | log <sub>2</sub> FoldChange | Gene Name | p-value  | log <sub>2</sub> FoldChange |
|-----------|----------|-----------------------------|-----------|----------|-----------------------------|
| Cnot7     | 1.91E-03 | 0.443959                    | Dnajb9    | 2.60E-03 | 0.713258                    |
| Ccdc107   | 1.92E-03 | 0.515161                    | Arl1      | 2.61E-03 | 0.645255                    |
| Dynll2    | 1.92E-03 | 0.463767                    | Ube2v2    | 2.61E-03 | 0.423095                    |
| Ube2e2    | 1.93E-03 | 0.385172                    | Aldh3a2   | 2.63E-03 | 0.316297                    |
| Tmem63a   | 1.97E-03 | 0.306583                    | Usmg5     | 2.66E-03 | 0.537339                    |
| Exosc8    | 1.98E-03 | 0.374235                    | Tbl1x     | 2.72E-03 | 0.378235                    |
| Lsm14b    | 2.01E-03 | 0.290195                    | Ddx17     | 2.74E-03 | 0.468972                    |
| Ccni      | 2.03E-03 | 0.512759                    | Socs2     | 2.75E-03 | 0.507609                    |
| Hrsp12    | 2.04E-03 | 0.38133                     | Elk4      | 2.79E-03 | 0.345598                    |
| Pitx1     | 2.07E-03 | 0.332727                    | Mphosph8  | 2.81E-03 | 0.27586                     |
| Eif5a     | 2.09E-03 | 0.459533                    | Polr2c    | 2.82E-03 | 0.405779                    |
| Canx      | 2.12E-03 | 0.566068                    | Btbd1     | 2.87E-03 | 0.353071                    |
| Rab7      | 2.17E-03 | 0.431906                    | Wdr43     | 2.87E-03 | 0.414645                    |
| Camk2n1   | 2.19E-03 | 0.312614                    | Tbc1d10a  | 2.99E-03 | 0.305832                    |
| Eci2      | 2.22E-03 | 0.277145                    | Nudt4     | 3.01E-03 | 0.515562                    |
| Ctsf      | 2.27E-03 | 0.309651                    | Gpx1      | 3.03E-03 | 0.604422                    |
| Papss1    | 2.28E-03 | 0.314942                    | Oser1     | 3.06E-03 | 0.427906                    |
| Slc39a1   | 2.29E-03 | 0.879294                    | Dctn4     | 3.09E-03 | 0.276592                    |
| Copg1     | 2.30E-03 | 0.427931                    | Map7      | 3.10E-03 | 0.258079                    |
| Impad1    | 2.30E-03 | 0.360647                    | Rsrp1     | 3.13E-03 | 0.533719                    |
| Oaz1      | 2.32E-03 | 0.447009                    | Fh1       | 3.13E-03 | 0.313402                    |
| Atf7      | 2.33E-03 | 0.272166                    | Rbbp7     | 3.17E-03 | 0.545732                    |
| I7Rn6     | 2.34E-03 | 0.275                       | Lrpap1    | 3.19E-03 | 0.477109                    |
| Ier2      | 2.35E-03 | 0.390166                    | Shfm1     | 3.21E-03 | 0.410881                    |
| Mrfap1    | 2.35E-03 | 0.594452                    | Zfp36     | 3.23E-03 | 0.582769                    |
| Rab5a     | 2.35E-03 | 0.412274                    | Plp2      | 3.23E-03 | 0.37638                     |
| Impact    | 2.36E-03 | 0.288196                    | Appl1     | 3.23E-03 | 0.291335                    |
| Zswim6    | 2.37E-03 | 0.385601                    | Rnf13     | 3.23E-03 | 0.430968                    |
| Twsg1     | 2.38E-03 | 0.34647                     | Mrpl4     | 3.24E-03 | 0.410917                    |
| Tra2b     | 2.38E-03 | 0.436706                    | Paip1     | 3.25E-03 | 0.338756                    |
| Ddr1      | 2.39E-03 | 0.765851                    | Dnajc1    | 3.26E-03 | 0.513063                    |
| Nrp2      | 2.39E-03 | 0.276834                    | Psma4     | 3.30E-03 | 0.403393                    |
| Pi4k2a    | 2.41E-03 | 0.3087                      | Psmc3     | 3.30E-03 | 0.328366                    |
| Ptma      | 2.44E-03 | 0.465896                    | Utp11l    | 3.48E-03 | 0.308023                    |
| Tmem87b   | 2.45E-03 | 0.261905                    | Ndufs8    | 3.49E-03 | 0.381733                    |
| Vgll4     | 2.47E-03 | 0.29806                     | Fkbp1a    | 3.51E-03 | 0.309471                    |
| Polr1d    | 2.54E-03 | 0.483064                    | Mme       | 3.52E-03 | 0.358236                    |
| Psmc6     | 2.55E-03 | 0.297988                    | Prpf38b   | 3.53E-03 | 0.457614                    |
| Camk1     | 2.55E-03 | 0.430615                    | Sptlc2    | 3.54E-03 | 0.279384                    |
| Mum1      | 2.59E-03 | 0.364717                    | Usp22     | 3.54E-03 | 0.270387                    |



| Gene Name | p-value  | log <sub>2</sub> FoldChange | Gene Name | p-value  | log <sub>2</sub> FoldChange |
|-----------|----------|-----------------------------|-----------|----------|-----------------------------|
| Rdx       | 3.62E-03 | 0.464885                    | Lamtor3   | 4.68E-03 | 0.433095                    |
| Fdx1      | 3.64E-03 | 0.527408                    | Dusp3     | 4.68E-03 | 0.440598                    |
| Usp14     | 3.69E-03 | 0.404576                    | Setd5     | 4.69E-03 | 0.27648                     |
| Map4      | 3.70E-03 | 0.413687                    | Samd4b    | 4.72E-03 | 0.399988                    |
| Tecr      | 3.71E-03 | 0.57214                     | Pdlim5    | 4.72E-03 | 0.338903                    |
| Psmb4     | 3.76E-03 | 0.484147                    | Psma7     | 4.72E-03 | 0.326725                    |
| Tnfaip1   | 3.77E-03 | 0.339029                    | Mid1ip1   | 4.73E-03 | 0.30091                     |
| Ywhab     | 3.78E-03 | 0.412564                    | Rbpj      | 4.74E-03 | 0.401337                    |
| Mlf2      | 3.80E-03 | 0.778458                    | Pbxip1    | 4.76E-03 | 0.419154                    |
| Fas       | 3.80E-03 | 0.47146                     | Zfr       | 4.78E-03 | 0.394555                    |
| Ifi35     | 3.82E-03 | 0.425226                    | Tsc22d4   | 4.80E-03 | 0.399326                    |
| Actn1     | 3.86E-03 | 0.399851                    | Frmpd1os  | 4.85E-03 | 0.339159                    |
| Glg1      | 3.91E-03 | 0.271614                    | Trnau1ap  | 4.92E-03 | 0.313566                    |
| Pfdn2     | 3.92E-03 | 0.375553                    | Uqcrq     | 4.93E-03 | 0.388712                    |
| Hspb8     | 3.93E-03 | 0.553828                    | Psma1     | 5.01E-03 | 0.273554                    |
| Diablo    | 3.95E-03 | 0.373037                    | Arid4b    | 5.04E-03 | 0.364344                    |
| Tbcb      | 3.96E-03 | 0.416763                    | Ssbp2     | 5.06E-03 | 0.312914                    |
| Srp72     | 4.08E-03 | 0.33921                     | Tax1bp1   | 5.09E-03 | 0.489624                    |
| Tuba1b    | 4.08E-03 | 0.398203                    | Rabac1    | 5.10E-03 | 0.398779                    |
| Rlim      | 4.09E-03 | 0.3549                      | Spg21     | 5.13E-03 | 0.389645                    |
| Rela      | 4.12E-03 | 0.489607                    | Aprt      | 5.15E-03 | 0.390515                    |
| Rbm47     | 4.15E-03 | 0.349972                    | Arnt      | 5.18E-03 | 0.26798                     |
| Raly      | 4.21E-03 | 0.529642                    | Cetn3     | 5.22E-03 | 0.397765                    |
| Barx2     | 4.21E-03 | 0.453948                    | Aldh7a1   | 5.23E-03 | 0.366097                    |
| Ufl1      | 4.26E-03 | 0.28847                     | Bmpr2     | 5.25E-03 | 0.258692                    |
| Hmgb1     | 4.29E-03 | 0.409707                    | Mrpl17    | 5.32E-03 | 0.469478                    |
| Car12     | 4.30E-03 | 0.286643                    | Ube2e1    | 5.34E-03 | 0.424902                    |
| Zfp131    | 4.31E-03 | 0.281612                    | Auts2     | 5.43E-03 | 0.507572                    |
| Hnrnp3    | 4.31E-03 | 0.386571                    | Ndufb2    | 5.43E-03 | 0.470279                    |
| Fli1      | 4.32E-03 | 0.303539                    | Bag3      | 5.46E-03 | 0.531048                    |
| Aff4      | 4.32E-03 | 0.582175                    | Ppp3cb    | 5.52E-03 | 0.304524                    |
| Rabgef1   | 4.37E-03 | 0.349583                    | Myh9      | 5.52E-03 | 0.397634                    |
| Itpr1     | 4.45E-03 | 0.320611                    | Cep57     | 5.52E-03 | 0.338667                    |
| Snx4      | 4.45E-03 | 0.291609                    | Dync1i2   | 5.53E-03 | 0.46765                     |
| Ifnar2    | 4.50E-03 | 0.459009                    | Elf2      | 5.53E-03 | 0.377302                    |
| Crip2     | 4.53E-03 | 0.483296                    | Sqstm1    | 5.63E-03 | 0.479893                    |
| Ankrd12   | 4.54E-03 | 0.276734                    | Smim10l1  | 5.63E-03 | 0.449089                    |
| Ubap2l    | 4.60E-03 | 0.320384                    | Uqcrc2    | 5.71E-03 | 0.349458                    |
| Sf3b1     | 4.61E-03 | 0.345633                    | Otud6b    | 5.74E-03 | 0.258086                    |
| Txnrd1    | 4.61E-03 | 0.294791                    | Abhd16a   | 5.80E-03 | 0.541678                    |

| Gene Name | p-value  | log <sub>2</sub> FoldChange | Gene Name     | p-value  | log <sub>2</sub> FoldChange |
|-----------|----------|-----------------------------|---------------|----------|-----------------------------|
| Vkorc1    | 5.80E-03 | 0.474267                    | Ergic3        | 7.66E-03 | 0.382088                    |
| Ppp2ca    | 5.81E-03 | 0.454109                    | Nop10         | 7.67E-03 | 0.295383                    |
| Lactb2    | 5.84E-03 | 0.260992                    | Vamp8         | 7.69E-03 | 0.592721                    |
| Efhd2     | 5.87E-03 | 0.406152                    | Hp1bp3        | 7.73E-03 | 0.331586                    |
| Glrx      | 5.87E-03 | 0.287745                    | Oxct1         | 7.77E-03 | 0.349622                    |
| Sdcbp     | 5.89E-03 | 0.571738                    | Enah          | 7.78E-03 | 0.636148                    |
| Clip1     | 6.05E-03 | 0.343722                    | Ddx6          | 7.78E-03 | 0.42594                     |
| Fam92a    | 6.07E-03 | 0.254861                    | Mat2a         | 7.84E-03 | 0.41729                     |
| Psmg4     | 6.13E-03 | 0.300962                    | Ppib          | 7.87E-03 | 0.255544                    |
| Hras      | 6.16E-03 | 0.340019                    | Mtfr1         | 7.89E-03 | 0.275613                    |
| G3bp1     | 6.21E-03 | 0.307568                    | Dek           | 7.90E-03 | 0.355849                    |
| Smg1      | 6.21E-03 | 0.353707                    | S100a13       | 8.07E-03 | 0.448458                    |
| Gtf2b     | 6.29E-03 | 0.26256                     | Cbx1          | 8.15E-03 | 0.327888                    |
| Bptf      | 6.36E-03 | 0.302757                    | Tob1          | 8.27E-03 | 0.438421                    |
| Npepps    | 6.41E-03 | 0.343506                    | Cltc          | 8.28E-03 | 0.55294                     |
| Ptprk     | 6.42E-03 | 0.285477                    | Rab21         | 8.37E-03 | 0.419256                    |
| Atp6v0b   | 6.43E-03 | 0.581864                    | Esyt2         | 8.38E-03 | 0.310513                    |
| Ewsr1     | 6.46E-03 | 0.47337                     | Iqgap1        | 8.45E-03 | 0.486743                    |
| Pea15a    | 6.50E-03 | 0.309605                    | Tmed2         | 8.49E-03 | 0.493177                    |
| Dph3      | 6.53E-03 | 0.459327                    | Smox          | 8.50E-03 | 0.275591                    |
| Dda1      | 6.57E-03 | 0.366425                    | Hs2st1        | 8.61E-03 | 0.291262                    |
| Zcrb1     | 6.73E-03 | 0.337742                    | Huwe1         | 8.65E-03 | 0.255481                    |
| Ldhb      | 6.85E-03 | 0.271493                    | Rtp4          | 8.69E-03 | 0.494957                    |
| Toporsos  | 6.89E-03 | 0.499572                    | Emc4          | 8.74E-03 | 0.368836                    |
| Qk        | 6.97E-03 | 0.517277                    | 1110065P20Rik | 8.76E-03 | 0.30843                     |
| Atp9a     | 7.02E-03 | 0.438063                    | Pttg1ip       | 8.85E-03 | 0.42988                     |
| Acyp1     | 7.16E-03 | 0.50942                     | Ostc          | 8.92E-03 | 0.313047                    |
| Adh5      | 7.16E-03 | 0.36641                     | Stx12         | 9.02E-03 | 0.328684                    |
| Anxa7     | 7.18E-03 | 0.496098                    | Romo1         | 9.31E-03 | 0.378105                    |
| Cdc73     | 7.25E-03 | 0.252457                    | Mga           | 9.34E-03 | 0.362629                    |
| H2-T23    | 7.28E-03 | 0.432773                    | Il10rb        | 9.39E-03 | 0.368216                    |
| Luzp1     | 7.42E-03 | 0.254343                    | Ndfip1        | 9.50E-03 | 0.385322                    |
| Ppm1b     | 7.43E-03 | 0.331579                    | Ube2n         | 9.51E-03 | 0.353994                    |
| Nfx1      | 7.45E-03 | 0.271672                    | Upf3b         | 9.65E-03 | 0.386996                    |
| Las1l     | 7.52E-03 | 0.252821                    | Gch1          | 9.66E-03 | 0.436072                    |
| Tmem183a  | 7.52E-03 | 0.34377                     | Ubr4          | 9.68E-03 | 0.28081                     |
| Dapl1     | 7.56E-03 | 0.399177                    | Armc1         | 9.68E-03 | 0.27976                     |
| Drap1     | 7.57E-03 | 0.308176                    | Yrdc          | 9.73E-03 | 0.365076                    |
| Pcmd1     | 7.62E-03 | 0.331984                    | Golph3        | 9.80E-03 | 0.472334                    |
| Birc3     | 7.64E-03 | 0.330461                    | Atrx          | 9.83E-03 | 0.264018                    |

| <b>Gene Name</b> | <b>p-value</b> | <b>log<sub>2</sub>FoldChange</b> |
|------------------|----------------|----------------------------------|
| Meis1            | 9.89E-03       | 0.291256                         |
| Sub1             | 9.90E-03       | 0.275019                         |
| Etf1             | 9.90E-03       | 0.355422                         |
| Chic2            | 9.97E-03       | 0.536628                         |

### Cluster 9

| Gene Name | p-value  | log <sub>2</sub> FoldChange | Gene Name     | p-value  | log <sub>2</sub> FoldChange |
|-----------|----------|-----------------------------|---------------|----------|-----------------------------|
| Cbr2      | 6.65E-25 | 0.276077                    | Pax9          | 1.23E-06 | 0.445836                    |
| Clmn      | 1.07E-24 | 0.266229                    | Spint2        | 3.54E-06 | 0.638601                    |
| Cxcl17    | 1.80E-21 | 0.697562                    | Azgp1         | 7.94E-06 | 0.322388                    |
| Pglyrp1   | 2.26E-19 | 1.558193                    | Cd24a         | 9.93E-06 | 0.564337                    |
| Gjb2      | 3.58E-17 | 0.561178                    | 1810011O10Rik | 1.48E-05 | 0.490424                    |
| Cyp2f2    | 7.34E-17 | 0.519772                    | Cryab         | 1.63E-05 | 0.714799                    |
| Ceacam1   | 8.60E-15 | 0.426604                    | Smim22        | 1.86E-05 | 0.260106                    |
| Edn1      | 2.02E-13 | 0.530644                    | Ier3          | 2.59E-05 | 0.343837                    |
| Palmd     | 1.64E-12 | 0.403256                    | Elf5          | 3.36E-05 | 0.366767                    |
| Foxq1     | 9.75E-12 | 0.332088                    | Map3k1        | 3.62E-05 | 0.428951                    |
| Arg1      | 2.33E-11 | 0.598792                    | Slc12a2       | 3.77E-05 | 0.412779                    |
| Krt8      | 4.04E-11 | 1.349869                    | Sil1          | 5.06E-05 | 0.254956                    |
| Cldn3     | 5.38E-11 | 0.640503                    | Anxa1         | 5.46E-05 | 0.318852                    |
| Wfdc18    | 1.10E-10 | 3.527273                    | BC037156      | 7.16E-05 | 1.444825                    |
| Epcam     | 1.25E-10 | 0.708696                    | Smarca2       | 8.98E-05 | 0.258669                    |
| Krt18     | 1.54E-10 | 1.351642                    | Atf3          | 9.60E-05 | 0.43579                     |
| Hspb8     | 2.60E-10 | 0.304559                    | Dhrs7         | 1.55E-04 | 0.36529                     |
| Phlda1    | 4.46E-10 | 1.20632                     | Rab3d         | 1.64E-04 | 0.263042                    |
| Ddr1      | 7.83E-10 | 0.295608                    | Syne4         | 1.70E-04 | 0.278437                    |
| Dcpp2     | 9.49E-10 | 4.449622                    | Lrrc26        | 1.96E-04 | 0.43431                     |
| Bglap3    | 1.04E-09 | 1.539436                    | Cracr2b       | 2.03E-04 | 0.409261                    |
| Pdk4      | 1.60E-09 | 0.70429                     | Rab4a         | 2.31E-04 | 0.276296                    |
| Krt23     | 2.26E-09 | 0.537955                    | Fos           | 2.31E-04 | 0.354551                    |
| Pla2g7    | 3.95E-09 | 0.429599                    | Cd9           | 2.93E-04 | 0.310229                    |
| Slc5a8    | 1.00E-08 | 0.255287                    | Neat1         | 3.23E-04 | 0.644808                    |
| Atp1b1    | 4.84E-08 | 0.720354                    | Rcn1          | 3.26E-04 | 0.303217                    |
| Enc1      | 6.86E-08 | 0.288017                    | Cited4        | 3.72E-04 | 0.364123                    |
| Lbp       | 7.28E-08 | 0.370265                    | Tmem176b      | 3.85E-04 | 0.251766                    |
| Dcpp3     | 1.14E-07 | 3.980858                    | Btg2          | 9.05E-04 | 0.391413                    |
| Barx2     | 1.40E-07 | 0.390783                    | Nucb2         | 9.75E-04 | 0.401645                    |
| Tmem176a  | 1.91E-07 | 0.565549                    | Folr1         | 1.04E-03 | 0.462258                    |
| Dcpp1     | 2.44E-07 | 3.558847                    | Taldo1        | 1.72E-03 | 0.297974                    |
| Etv1      | 2.69E-07 | 0.367707                    | Plet1         | 2.27E-03 | 0.278222                    |
| Gmcs      | 4.22E-07 | 0.288199                    | Fxyd3         | 2.79E-03 | 0.425557                    |
| Nupr1     | 5.11E-07 | 0.756362                    | Gm17056       | 3.37E-03 | 0.264665                    |
| Glul      | 1.00E-06 | 0.605025                    | Foxo3         | 3.45E-03 | 0.283783                    |
| Chka      | 1.02E-06 | 0.396596                    | Hist1h1c      | 8.49E-03 | 0.686322                    |
| Sox9      | 1.21E-06 | 0.255741                    |               |          |                             |
